# Supplementary material
Source: publisher figshare collection journal article supplement (https://gsajournals.figshare.com/ndownloader/files/31976096)
Supplement: Supplementary file 1 [file 31976096]

## Sheet: Raw Data
Location	Year	PlotId	name_pretty	Pop	x	y	ASI	EV	Final_PH	GDM	GY	P_conc
HOH	2019	1	P080	ED	1	1	0	5	191.667	68.0008	5.70629	2678.2
HOH	2019	2	WALL.010	WA	2	1	4	5	136.667	63.1335	1.94578	3137.5
HOH	2019	3	D105	EF	3	1	NA	NA	NA	70.1836	5.00573	2955.5
HOH	2019	4	S058	ED	4	1	NA	NA	NA	68.2435	3.69823	2777.3
HOH	2019	5	F147	EF	5	1	1	5	181.667	NA	NA	3189
HOH	2019	6	P081	ED	6	1	5	5	178.333	64.0489	1.32741	2951.8
HOH	2019	7	F040	EF	7	1	0	7	156.667	75.7381	4.43144	2953.7
HOH	2019	8	F048	EF	8	1	3	5	168.333	76.9572	3.59339	3142.9
HOH	2019	9	P206	ED	9	1	2	5	136.667	74.7925	3.37813	3067.8
HOH	2019	10	SATU.182	SM	10	1	8	5	203.333	67.1564	0.343169	2798.9
HOH	2019	11	CAMP.004	CG	11	1	2	5	123.333	75.5535	0.690055	3048.9
HOH	2019	12	GELB.106	GB	12	1	5	7	175	67.2414	0.267172	3001.1
HOH	2019	13	F124	EF	13	1	0	5	162.333	75.4879	3.53435	2861.3
HOH	2019	14	WALL.293	WA	14	1	12	7	138.333	62.5135	0.465934	2852.6
HOH	2019	15	WALL.104	WA	15	1	10	7	181.667	61.7225	0.776057	2849.8
HOH	2019	16	S050	ED	16	1	2	5	181.667	72.7873	5.44049	2357.5
HOH	2019	17	WALL.317	WA	17	1	3	7	156.667	67.1134	3.10556	2902.8
HOH	2019	18	SATU.255	SM	18	1	19	3	173.333	100	NA	NA
HOH	2019	19	STGA.158	RT	19	1	1	3	138.333	68.4048	0.481	3160.4
HOH	2019	20	F088	EF	20	1	2	7	172.333	71.172	4.648	2824.5
HOH	2019	21	SATU.269	SM	21	1	6	5	133.333	71.0819	1.03163	2544.4
HOH	2019	22	P223	ED	22	1	-1	5	151.667	64.7887	3.96388	2993.5
HOH	2019	23	CAMP.001	CG	23	1	-1	7	155	77.2341	0.631904	3481.1
HOH	2019	24	P122	ED	24	1	3	5	170	68.2544	2.98306	2426.3
HOH	2019	25	P335	ED	25	1	-2	5	171.667	66.0674	0.53944	2603.7
HOH	2019	26	GELB.A216	GB	26	1	3	7	160	72.0765	0.966546	2823.9
HOH	2019	27	P410	ED	27	1	0	3	195	54.9478	0.885117	2840.3
HOH	2019	28	STRE.201	SF	28	1	1	3	160	71.1682	0.786883	2689.6
HOH	2019	29	F136	EF	29	1	2	7	165	69.2604	3.76222	3216.3
HOH	2019	30	P075	ED	30	1	4	5	166.667	69.5287	5.25289	2718.2
HOH	2019	31	SATU.264	SM	31	1	3	5	167.333	69.9865	1.90457	3115.5
HOH	2019	32	F104	EF	32	1	3	5	161.667	71.9353	3.24308	3078.6
HOH	2019	33	D102	EF	33	1	3	7	136.667	68.8134	0.226167	2923.8
HOH	2019	34	CAMP.104	CG	34	1	6	5	136.667	69.034	1.81985	3232.3
HOH	2019	35	WALL.222	WA	35	1	4	NA	123.333	67.2393	0.768097	2731.8
HOH	2019	36	SATU.290	SM	36	1	1	3	151.667	70.4716	1.25087	2959.6
HOH	2019	37	F252	EF	37	1	9	5	175	69.0016	1.28067	2669.5
HOH	2019	38	STRE.142	SF	38	1	1	NA	184.333	70.6887	0.661646	2927.2
HOH	2019	39	STRE.210	SF	39	1	3	5	176.667	76.3262	0.420048	2857.6
HOH	2019	40	P330	ED	40	1	1	5	175	62.7883	6.33931	2525.3
HOH	2019	41	STRE.220	SF	41	1	0	9	158.333	68.5011	1.58454	2972.1
HOH	2019	42	L046	EF	42	1	1	7	160	71.0584	3.88808	2740
HOH	2019	43	CAMP.126	CG	43	1	3	7	153.333	76.7359	1.16945	3245.9
HOH	2019	44	EP1	EF	44	1	5	5	152.333	69.3141	1.5256	3510.3
HOH	2019	45	STGA.183	RT	45	1	0	7	121.667	68.75	0.330458	3526.7
HOH	2019	46	GELB.A119	GB	45	2	9	7	110	70.2774	0.720812	3229.3
HOH	2019	47	VD03	ED	44	2	0	5	156.667	69.6978	5.57037	2379.9
HOH	2019	48	WALL.105	WA	43	2	5	5	128.333	69.6272	0.42403	3365.2
HOH	2019	49	GELB.130	GB	42	2	1	3	123.333	76.7783	0.280241	3242
HOH	2019	50	STRE.307	SF	41	2	2	NA	161.667	67.1964	1.34135	2813
HOH	2019	51	GELB.A121	GB	40	2	8	NA	153.333	66.4026	0.598066	2647.5
HOH	2019	52	S072	ED	39	2	-1	5	150	75.3491	5.16493	2879.7
HOH	2019	53	D107	EF	38	2	5	5	136.667	63.9847	2.62412	2853.8
HOH	2019	54	P087	ED	37	2	2	3	145	70.4606	4.63219	2318.4
HOH	2019	55	STRE.208	SF	36	2	-1	NA	155	72.2143	1.32068	2481.3
HOH	2019	56	F161	EF	35	2	3	NA	183.333	64.7107	4.13167	2797.4
HOH	2019	57	SATU.196	SM	34	2	2	NA	120	71.7554	2.76808	2666.8
HOH	2019	58	GELB.109	GB	33	2	4	5	131.667	100	NA	NA
HOH	2019	59	SATU.106	SM	32	2	1	5	123.333	74.4526	1.01305	2914.4
HOH	2019	60	SATU.257	SM	31	2	0	3	91.6667	78.3137	0.548196	2603.7
HOH	2019	61	L059	EF	30	2	3	3	168.333	74.3672	1.54572	2838.7
HOH	2019	62	P066	ED	29	2	1	5	165	70.4929	3.77419	2543.3
HOH	2019	63	SATU.163	SM	28	2	8	5	180	62.8301	1.67369	2771.4
HOH	2019	64	GELB.A115	GB	27	2	7	7	200	62.2544	0.579692	2998.5
HOH	2019	65	P006	ED	26	2	8	5	155	67.0993	2.19169	2653.2
HOH	2019	66	P064	ED	25	2	NA	NA	95	100	NA	NA
HOH	2019	67	S058	ED	24	2	0	5	136.667	71.861	5.02859	2323.7
HOH	2019	68	F103	EF	23	2	1	3	151.667	72.225	0.834921	3385.7
HOH	2019	69	STRE.165	SF	22	2	5	NA	139	65.1318	0.520186	3289.3
HOH	2019	70	P182	ED	21	2	2	5	150	66.9189	6.90391	2454.4
HOH	2019	71	SATU.120	SM	20	2	NA	1	137.5	57.9436	0.323422	2944.9
HOH	2019	72	F201	EF	19	2	2	5	180	72.1707	3.95327	3230.3
HOH	2019	73	SATU.224	SM	18	2	4	5	170	67.4566	3.30088	2936
HOH	2019	74	S046	ED	17	2	0	5	161.667	69.72	4.87401	2632.2
HOH	2019	75	WALL.260	WA	16	2	12	3	148.333	64.0381	0.406749	2635.9
HOH	2019	76	GELB.162	GB	15	2	8	7	170	63.9196	2.2636	2585.6
HOH	2019	77	STRE.167	SF	14	2	3	5	153.333	70.154	0.777073	2855.9
HOH	2019	78	P159	ED	13	2	3	5	150	66.0084	2.93638	2738.8
HOH	2019	79	GELB.A106	GB	12	2	1	5	166.667	68.1448	2.20562	3032.4
HOH	2019	80	WALL.141	WA	11	2	7	5	146.667	65.8861	0.664901	2739.6
HOH	2019	81	S066	ED	10	2	0	5	160	68.5545	4.67759	2618.2
HOH	2019	82	STRE.205	SF	9	2	2	7	145	74.2746	3.03622	3048.1
HOH	2019	83	SATU.170	SM	8	2	NA	1	NA	41.8588	0.0971124	3578.3
HOH	2019	84	F242	EF	7	2	4	5	195	64.87	4.11438	2733.4
HOH	2019	85	P271	ED	6	2	1	5	208.333	61.8814	6.60068	2372.8
HOH	2019	86	F195	EF	5	2	1	5	163.333	71.8919	3.21608	2508.1
HOH	2019	87	P074	ED	4	2	3	3	165	60.9621	2.67685	3068
HOH	2019	88	STGA.104	RT	3	2	1	5	118.333	73.7674	1.36273	2595.3
HOH	2019	89	WALL.163	WA	2	2	3	3	130	67.8587	1.00917	3022.4
HOH	2019	90	F138	EF	1	2	2	3	146.667	69.0436	2.34541	2965.8
HOH	2019	91	F087	EF	1	3	1	3	150	76.5976	1.86285	2680.1
HOH	2019	92	F259	EF	2	3	3	5	146.667	74.3117	1.7192	3020.5
HOH	2019	93	SATU.129	SM	3	3	1	5	163.333	60.4967	2.36361	3082.2
HOH	2019	94	GELB.A212	GB	4	3	1	5	148.333	67.8699	0.866924	3071
HOH	2019	95	P250	ED	5	3	1	3	156.667	63.0493	4.04976	2761.6
HOH	2019	96	GELB.124	GB	6	3	-6	7	188.333	69.1193	2.3989	2976.2
HOH	2019	97	F054	EF	7	3	2	5	158.333	74.8524	3.70494	2682.7
HOH	2019	98	FV2	EF	8	3	1	3	148.333	66.8773	1.53093	3033.7
HOH	2019	99	F023	EF	9	3	4	7	170	66.1876	4.71796	2761.9
HOH	2019	100	FV7	EF	10	3	2	5	121.667	74.2392	2.85103	3005.3
HOH	2019	101	SATU.223	SM	11	3	NA	NA	110	100	NA	NA
HOH	2019	102	P290	ED	12	3	0	5	170	64.4587	6.61969	2801.2
HOH	2019	103	F052	EF	13	3	2	5	158.333	71.4257	3.04321	3132.8
HOH	2019	104	P063	ED	14	3	4	5	161.667	63.9404	5.99346	2459.5
HOH	2019	105	SATU.165	SM	15	3	4	NA	140	70.8167	0.562757	3003
HOH	2019	106	P420	ED	16	3	3	3	160	69.0913	4.63188	2322.1
HOH	2019	107	F037	EF	17	3	2	5	181.667	72.5648	4.2812	3160.4
HOH	2019	108	L016	EF	18	3	5	3	165	65.8616	3.18452	2773.7
HOH	2019	109	S036	ED	19	3	2	5	145	73.324	5.19635	2574.4
HOH	2019	110	F066	EF	20	3	5	3	160	72.7318	1.37403	3044.1
HOH	2019	111	SATU.130	SM	21	3	5	5	155	67.1785	2.52043	2827.8
HOH	2019	112	GELB.166	GB	22	3	7	5	157.333	63.665	0.864995	2968.8
HOH	2019	113	WALL.218	WA	23	3	7	5	145	75.5197	0.297296	2842
HOH	2019	114	WALL.277	WA	24	3	5	5	125	68.4425	1.76125	3237.3
HOH	2019	115	SATU.270	SM	25	3	-2	5	166.667	67.2459	6.0973	2868.7
HOH	2019	116	STRE.109	SF	26	3	2	7	171.667	67.0272	0.527727	3034.8
HOH	2019	117	F055	EF	27	3	0	7	176.667	65.5398	5.76084	3383.3
HOH	2019	118	F005	EF	28	3	3	7	176.667	73.0159	2.55263	2893.7
HOH	2019	119	STRE.163	SF	29	3	1	5	121.667	66.2255	2.15365	2928.4
HOH	2019	120	SATU.225	SM	30	3	5	1	100	100	NA	NA
HOH	2019	121	GELB.A125	GB	31	3	2	5	113.333	69.0156	0.447566	3232.9
HOH	2019	122	SATU.151	SM	32	3	NA	1	126.667	56.4479	0.246301	3184.6
HOH	2019	123	SATU.013	SM	33	3	3	3	138.333	69.4616	2.92074	3239.6
HOH	2019	124	SATU.002	SM	34	3	NA	NA	NA	100	NA	NA
HOH	2019	125	WALL.012	WA	35	3	7	NA	125	68.8596	0.442538	3170.9
HOH	2019	126	SATU.248	SM	36	3	0	5	128.333	69.3177	1.77222	2761.8
HOH	2019	127	P102	ED	37	3	-4	5	148.333	72.1269	5.02941	3022.8
HOH	2019	128	P154	ED	38	3	0	5	138.333	70.8494	5.22821	2444.4
HOH	2019	129	SATU.014	SM	39	3	1	3	113.333	70.1778	1.03629	3337.8
HOH	2019	130	D167	EF	40	3	0	5	173.333	75.5398	3.70233	3476.6
HOH	2019	131	CAMP.137	CG	41	3	6	NA	151.667	69.0754	0.297945	3616.5
HOH	2019	132	SATU.167	SM	42	3	9	3	125	69.5108	0.501289	3112
HOH	2019	133	WALL.172	WA	43	3	7	7	150	55.5716	0.687606	3327.9
HOH	2019	134	SATU.280	SM	44	3	1	5	143.333	62.5976	1.70036	2977.1
HOH	2019	135	SATU.194	SM	45	3	NA	1	110	100	NA	NA
HOH	2019	136	WALL.174	WA	45	4	4	7	156.667	70.6309	1.4178	3110.9
HOH	2019	137	SATU.278	SM	44	4	2	NA	208.333	70.815	5.57172	3069.3
HOH	2019	138	F145	EF	43	4	0	5	193.333	71.2986	3.78417	3250.2
HOH	2019	139	SATU.152	SM	42	4	8	3	146.667	64.6439	2.60817	3096.3
HOH	2019	140	SATU.116	SM	41	4	3	5	113.333	72.1763	1.04018	2996.6
HOH	2019	141	WALL.257	WA	40	4	7	3	131.667	74.5241	0.796539	2906
HOH	2019	142	S028	ED	39	4	0	5	160	70.688	4.58824	2545.2
HOH	2019	143	SATU.004	SM	38	4	-1	5	120	71.4031	3.22361	2837
HOH	2019	144	STRE.179	SF	37	4	-1	5	158.333	77.0629	0.0919618	3351.6
HOH	2019	145	GELB.121	GB	36	4	3	9	236.667	73.7916	8.00332	3025.4
HOH	2019	146	F077	EF	35	4	1	3	150	72.8454	1.13918	3113.4
HOH	2019	147	WALL.258	WA	34	4	6	7	190	65.7302	0.620712	2946.9
HOH	2019	148	P040	ED	33	4	1	5	174	64.1544	3.72053	2723
HOH	2019	149	STRE.119	SF	32	4	7	5	131.667	66.6079	1.05818	3141.3
HOH	2019	150	F151	EF	31	4	4	3	151.667	70.8072	3.58685	2737.8
HOH	2019	151	STRE.174	SF	30	4	1	NA	160	70.0536	0.745371	3101.4
HOH	2019	152	L045	EF	29	4	5	5	188.333	65.2274	3.98518	2563.8
HOH	2019	153	STRE.215	SF	28	4	-1	5	168.333	71.6931	1.8682	3066.6
HOH	2019	154	SATU.186	SM	27	4	3	3	146.667	71.002	1.80913	2910.6
HOH	2019	155	F099	EF	26	4	2	NA	181.667	66.7964	4.89451	2902.4
HOH	2019	156	F109	EF	25	4	6	3	148.333	67.0184	1.25928	2817.4
HOH	2019	157	P129	ED	24	4	3	3	136.667	70.3623	2.968	3056.6
HOH	2019	158	L023	EF	23	4	4	5	170	62.1588	2.8881	2747.2
HOH	2019	159	STRE.155	SF	22	4	3	5	145	74.3615	0.374162	3159.3
HOH	2019	160	STRE.190	SF	21	4	4	5	130	71.9261	0.577447	3100.7
HOH	2019	161	F108	EF	20	4	3	5	143.333	69.9144	3.6923	3129.5
HOH	2019	162	STRE.192	SF	19	4	2	5	130	72.0172	0.887852	2589.8
HOH	2019	163	P272	ED	18	4	0	3	196.667	61.4537	3.57599	2295.9
HOH	2019	164	GELB.A217	GB	17	4	3	5	171.667	71.4286	0.849762	3306.4
HOH	2019	165	STGA.173	RT	16	4	5	5	108.333	NA	NA	2961.9
HOH	2019	166	F090	EF	15	4	4	3	164	72.9303	2.23714	2985.9
HOH	2019	167	P317	ED	14	4	3	5	160	72.8097	6.1182	2767.7
HOH	2019	168	GELB.164	GB	13	4	2	7	166.667	72.8184	1.98734	3298.8
HOH	2019	169	P140	ED	12	4	-1	5	191.667	67.5601	5.56278	2805
HOH	2019	170	P213	ED	11	4	3	3	160	64.6138	3.64799	2569.8
HOH	2019	171	D146	EF	10	4	1	5	150	67.2533	3.52385	3148.9
HOH	2019	172	P085	ED	9	4	2	5	153.333	68.4033	2.91193	3310.2
HOH	2019	173	GELB.149	GB	8	4	2	5	166.667	NA	NA	3161.2
HOH	2019	174	STGA.128	RT	7	4	3	5	151.667	66.9905	0.62424	2938.5
HOH	2019	175	F169	EF	6	4	0	7	170.667	71.4966	3.84711	3053.6
HOH	2019	176	WALL.156	WA	5	4	2	5	160	75.809	0.702244	3372.1
HOH	2019	177	WALL.149	WA	4	4	9	5	138.333	65.7967	0.159886	3022.2
HOH	2019	178	F030	EF	3	4	2	5	153.333	66.2861	5.35614	2934
HOH	2019	179	GELB.A122	GB	2	4	1	5	148.333	66.2796	0.247112	3415.3
HOH	2019	180	L007	EF	1	4	5	5	183.333	62.5063	2.06344	2306
HOH	2019	181	F139.STRE	EF	1	5	0	5	154.667	69.7965	1.04311	2802.2
HOH	2019	182	SATU.282	SM	2	5	1	3	144.667	62.2467	3.22417	3244.2
HOH	2019	183	SATU.159	SM	3	5	-1	5	123.333	72.9412	2.40925	2932.8
HOH	2019	184	P362	ED	4	5	0	5	114.333	78.4641	2.63705	2860.7
HOH	2019	185	WALL.269	WA	5	5	3	5	152.667	75.8765	1.82647	3158.4
HOH	2019	186	SATU.218	SM	6	5	4	3	120	68.2905	1.34601	3134.6
HOH	2019	187	GELB.A203	GB	7	5	1	7	166.667	71.0009	1.5167	2538
HOH	2019	188	SATU.008	SM	8	5	3	3	128.333	68.5787	0.445762	3294.4
HOH	2019	189	F050	EF	9	5	1	5	156.667	71.721	4.48723	3042.2
HOH	2019	190	D150	EF	10	5	1	5	168.333	74.1432	3.18877	2883.5
HOH	2019	191	STGA.150	RT	11	5	2	5	150	78.3564	0.385253	3275
HOH	2019	192	WALL.113	WA	12	5	1	3	131.667	70.7886	0.578107	3085.6
HOH	2019	193	SATU.247	SM	13	5	NA	1	NA	100	NA	NA
HOH	2019	194	L037	EF	14	5	1	5	163.333	70.1294	4.73817	3124
HOH	2019	195	SATU.162	SM	15	5	4	5	110	69.4533	2.66828	2576.3
HOH	2019	196	P106	ED	16	5	2	5	158.333	70.7283	4.57659	2521.6
HOH	2019	197	WALL.196	WA	17	5	9	5	145	62.4771	0.231998	2989.6
HOH	2019	198	F117	EF	18	5	6	5	146.667	60.0922	0.761168	3117.9
HOH	2019	199	GELB.138	GB	19	5	3	3	170	67.466	0.950146	2707.1
HOH	2019	200	GELB.143	GB	20	5	0	7	148.333	68.1302	1.94784	3242.3
HOH	2019	201	SATU.126	SM	21	5	3	NA	118.333	64.4912	1.56939	2972.3
HOH	2019	202	STGA.172	RT	22	5	3	7	136.667	73.877	1.39283	3187.8
HOH	2019	203	SATU.277	SM	23	5	4	1	106.667	60.4982	0.345243	3032.9
HOH	2019	204	WALL.165	WA	24	5	1	3	140	72.1358	1.17665	3141
HOH	2019	205	SATU.242	SM	25	5	NA	1	130	100	NA	NA
HOH	2019	206	SATU.123	SM	26	5	6	3	103.333	69.2308	0.370038	2862.8
HOH	2019	207	WALL.296	WA	27	5	4	5	136.667	66.0178	2.35288	3284.1
HOH	2019	208	F082	EF	28	5	3	3	180	69.3766	3.57902	3149.2
HOH	2019	209	STGA.180	RT	29	5	2	5	110	78.7448	0.157227	2477.1
HOH	2019	210	S018	ED	30	5	1	5	165	57.5922	2.73141	3242.5
HOH	2019	211	WALL.151	WA	31	5	9	3	131.667	66.9284	0.259348	3022.4
HOH	2019	212	P353	ED	32	5	1	5	128.333	68.3388	7.20052	2507.3
HOH	2019	213	WALL.225	WA	33	5	12	5	148.333	46.5216	0.563842	3494
HOH	2019	214	P304	ED	34	5	2	5	153.333	73.0568	5.40389	2767.3
HOH	2019	215	GELB.133	GB	35	5	6	7	188.333	68.9525	2.21924	2671
HOH	2019	216	STRE.156	SF	36	5	2	5	145	74.0349	0.868059	3050.7
HOH	2019	217	CAMP.301	CG	37	5	4	5	155	73.9949	0.144783	2938.6
HOH	2019	218	GELB.A102	GB	38	5	5	NA	181.667	65.324	2.065	2729.5
HOH	2019	219	P120	ED	39	5	5	5	172.667	62.1817	2.33534	2594.9
HOH	2019	220	STGA.101	RT	40	5	3	5	111.667	73.202	0.248887	2993.7
HOH	2019	221	P383	ED	41	5	3	3	165	63.5453	5.36788	2126
HOH	2019	222	SATU.281	SM	42	5	5	3	145	65.5427	2.29072	2742
HOH	2019	223	F047	EF	43	5	1	5	166.667	72.3181	2.57368	2989
HOH	2019	224	P165	ED	44	5	3	5	168.333	68.3276	3.65234	2759.3
HOH	2019	225	P354	ED	45	5	1	5	200	73.0034	4.35222	2560.4
HOH	2019	226	F162	EF	45	6	0	5	186.667	69.268	6.97725	2614.7
HOH	2019	227	SATU.140	SM	44	6	6	3	120	75.6402	0.806072	2875.5
HOH	2019	228	STRE.146	SF	43	6	4	7	145	66.565	2.63176	2886.1
HOH	2019	229	WALL.271	WA	42	6	1	5	164.333	68.4823	0.520009	2907.5
HOH	2019	230	L050	EF	41	6	-2	5	176.667	65.864	4.30059	2897.8
HOH	2019	231	L047	EF	40	6	0	3	168.333	71.163	3.42306	2656.3
HOH	2019	232	L056	EF	39	6	0	3	146.667	67.2429	2.5921	2935
HOH	2019	233	F045	EF	38	6	1	5	153.333	69.8089	5.20297	3196.6
HOH	2019	234	F207	EF	37	6	3	5	170	73.0621	3.0971	2990.4
HOH	2019	235	WALL.316	WA	36	6	6	7	160	65.3583	2.25018	2697.2
HOH	2019	236	P133	ED	35	6	0	5	183.333	73.8745	4.61654	2940.9
HOH	2019	237	P422	ED	34	6	5	5	155	68.5019	5.26928	2491.7
HOH	2019	238	CAMP.107	CG	33	6	1	3	145	65.8309	0.378199	3516.7
HOH	2019	239	SATU.212	SM	32	6	7	3	143.333	65.7118	1.02499	3367.1
HOH	2019	240	P184	ED	31	6	2	5	130	65.8946	5.62597	2623
HOH	2019	241	WALL.304	WA	30	6	8	5	163.333	60.0837	0.541755	3266.6
HOH	2019	242	WALL.185	WA	29	6	7	5	141.667	76.8525	0.19623	3078.7
HOH	2019	243	D105	EF	28	6	4	5	150	69.5963	4.62769	2670.4
HOH	2019	244	P344	ED	27	6	2	5	178.333	58.7657	1.35533	2723.4
HOH	2019	245	P312	ED	26	6	1	5	151.667	62.7298	6.35955	2702.9
HOH	2019	246	P033	ED	25	6	4	5	146.667	68.9408	4.7367	3020.3
HOH	2019	247	P130	ED	24	6	-3	5	167.333	71.144	7.69825	2818.6
HOH	2019	248	F106	EF	23	6	2	3	171.667	66.9029	2.87582	2969.2
HOH	2019	249	P105	ED	22	6	-2	5	168.333	75.9142	4.54372	2861
HOH	2019	250	GELB.129	GB	21	6	6	7	168.667	61.5719	0.601147	2901.8
HOH	2019	251	P096	ED	20	6	3	3	133.333	66.3539	4.72385	2658.4
HOH	2019	252	P108	ED	19	6	2	5	153.333	70.1923	3.82045	2414.7
HOH	2019	253	CAMP.117	CG	18	6	2	NA	150.333	74.8866	1.49886	3654.6
HOH	2019	254	P245	ED	17	6	0	5	158.333	72.5899	5.99919	2659.9
HOH	2019	255	P409	ED	16	6	4	5	177.333	60.6466	5.35095	2279.6
HOH	2019	256	P385	ED	15	6	3	5	158.333	72.0339	2.60054	2914.3
HOH	2019	257	SATU.245	SM	14	6	-2	NA	88.6667	100	NA	NA
HOH	2019	258	F179	EF	13	6	3	5	163.667	74.9828	2.5003	3211.5
HOH	2019	259	GELB.158	GB	12	6	8	7	195	67.789	1.4221	3006.9
HOH	2019	260	WALL.215	WA	11	6	11	NA	160	76.5769	0.359146	2941.9
HOH	2019	261	P024	ED	10	6	3	5	165	62.082	5.34226	2707.5
HOH	2019	262	F186	EF	9	6	2	5	161.667	71.0257	2.3564	2750
HOH	2019	263	STGA.171	RT	8	6	2	5	120	72.5909	1.04325	3588.5
HOH	2019	264	L041	EF	7	6	0	5	168.333	74.539	2.94255	2999
HOH	2019	265	STRE.212	SF	6	6	8	NA	141.667	111.063	0.557352	2794.9
HOH	2019	266	WALL.134	WA	5	6	1	5	147.667	72.6494	1.01019	3285.6
HOH	2019	267	SATU.135	SM	4	6	3	7	112.333	67.19	5.28584	3137.2
HOH	2019	268	GELB.A219	GB	3	6	2	7	171.667	66.2224	1.62477	NA
HOH	2019	269	P351	ED	2	6	1	5	181	62.6222	5.06823	2411.8
HOH	2019	270	GELB.104	GB	1	6	1	5	139.667	69.3385	1.6016	3001.7
HOH	2019	271	P194	ED	1	7	2	5	151.667	69.1767	5.09602	2622.3
HOH	2019	272	STGA.151	RT	2	7	1	7	121	72.4474	1.14527	3277.6
HOH	2019	273	WALL.254	WA	3	7	3	5	147.667	100	NA	3096.5
HOH	2019	274	F137	EF	4	7	0	5	172	69.0153	3.02264	2622.8
HOH	2019	275	P065	ED	5	7	2	3	192.667	66.5323	3.34336	2315.9
HOH	2019	276	SATU.240	SM	6	7	3	3	146.667	63.3226	4.08262	2684.3
HOH	2019	277	P289	ED	7	7	0	5	180	64.3064	6.6211	2952.5
HOH	2019	278	WALL.189	WA	8	7	4	3	174.667	69.8502	1.67443	3371.2
HOH	2019	279	STRE.216	SF	9	7	1	5	138.333	70.1475	1.00568	3272.7
HOH	2019	280	P060	ED	10	7	5	3	153.333	70.4762	3.32695	2808
HOH	2019	281	WALL.228	WA	11	7	0	3	158.333	70.5637	1.09597	2755.4
HOH	2019	282	SATU.183	SM	12	7	2	3	187	59.7758	2.45798	3507.3
HOH	2019	283	L051	EF	13	7	-1	5	155	75.0758	4.20262	2897.8
HOH	2019	284	GELB.148	GB	14	7	4	NA	161.667	58.6963	0.349047	2761.9
HOH	2019	285	WALL.143	WA	15	7	10	5	131.667	57.6264	0.239918	3493.7
HOH	2019	286	SATU.241	SM	16	7	3	NA	161.667	69.1951	2.47234	2995
HOH	2019	287	WALL.175	WA	17	7	9	NA	131.667	70.2711	0.79746	3410.2
HOH	2019	288	WALL.301	WA	18	7	4	5	170	31.8216	0.556241	4389.1
HOH	2019	289	F154	EF	19	7	1	5	173.333	69.6854	4.06614	2820.9
HOH	2019	290	P135	ED	20	7	2	5	165	69.6563	5.0329	2926.1
HOH	2019	291	P110	ED	21	7	-1	5	175	76.9669	2.7989	2789.9
HOH	2019	292	F266	EF	22	7	5	5	190	57.3266	2.20937	3157.6
HOH	2019	293	L060	EF	23	7	2	5	178.333	70.789	3.86437	2831.5
HOH	2019	294	SATU.127	SM	24	7	0	5	150	67.6053	3.4188	3220.6
HOH	2019	295	WALL.207	WA	25	7	5	5	153.333	73.3796	0.803507	3298.7
HOH	2019	296	SATU.105	SM	26	7	NA	1	NA	100	NA	NA
HOH	2019	297	SATU.139	SM	27	7	4	5	190	69.098	4.99417	3137.3
HOH	2019	298	WALL.182	WA	28	7	1	5	145	67.1313	0.940173	3407.3
HOH	2019	299	P360	ED	29	7	3	5	162.333	75.946	4.29968	2903.7
HOH	2019	300	WALL.184	WA	30	7	8	5	125	63.6489	0.533696	3666.7
HOH	2019	301	F101	EF	31	7	0	5	161.667	75.2446	3.19414	3144.4
HOH	2019	302	WALL.108	WA	32	7	7	7	136.667	68.3097	1.14145	3209.8
HOH	2019	303	STRE.214	SF	33	7	0	5	161.667	72.5093	0.684488	2750.5
HOH	2019	304	CAMP.302	CG	34	7	1	7	191.667	78.2899	1.96286	3400.3
HOH	2019	305	WALL.219	WA	35	7	4	5	133.333	77.8184	0.714373	3119.6
HOH	2019	306	P415	ED	36	7	5	5	166.667	63.4209	2.78714	2435.5
HOH	2019	307	SATU.134	SM	37	7	1	3	143.333	77.3876	1.73916	2715.6
HOH	2019	308	SATU.243	SM	38	7	2	5	170	68.4953	3.04815	3156.5
HOH	2019	309	WALL.128	WA	39	7	8	5	170	68.9519	1.52039	3215.6
HOH	2019	310	GELB.110	GB	40	7	4	5	118.333	75.0062	1.61063	2816.1
HOH	2019	311	STRE.172	SF	41	7	1	5	141.667	78.7879	2.54564	2680.2
HOH	2019	312	SATU.235	SM	42	7	11	5	143.333	59.2548	1.1448	2619.8
HOH	2019	313	SATU.292	SM	43	7	NA	NA	NA	100	NA	NA
HOH	2019	314	P053	ED	44	7	0	5	153.333	65.5336	5.61197	2260.4
HOH	2019	315	STGA.108	RT	45	7	0	5	125.667	73.8468	0.835823	3461.5
HOH	2019	316	F260	EF	45	8	2	5	168.333	74.5438	2.11729	2899.4
HOH	2019	317	P042	ED	44	8	1	5	156.667	62.9181	6.2831	3086.3
HOH	2019	318	SATU.228	SM	43	8	3	5	135.667	74.2268	0.898268	2750.2
HOH	2019	319	SATU.141	SM	42	8	9	5	148.333	63.5753	0.413239	2731.8
HOH	2019	320	SATU.169	SM	41	8	1	5	131.667	66.3501	3.26652	3307.2
HOH	2019	321	STRE.158	SF	40	8	2	5	146.667	82.3374	1.32563	2846
HOH	2019	322	WALL.270	WA	39	8	3	3	103.333	72.9221	0.187531	2945.7
HOH	2019	323	D171	EF	38	8	1	5	141.667	75.7049	3.4558	2962.2
HOH	2019	324	WALL.297	WA	37	8	6	7	150	67.1749	2.17915	2833.5
HOH	2019	325	L035	EF	36	8	4	5	141.667	70.8611	4.49637	2882.4
HOH	2019	326	WALL.150	WA	35	8	6	5	133.333	73.5968	0.155289	2972.6
HOH	2019	327	SATU.203	SM	34	8	NA	1	150	100	NA	NA
HOH	2019	328	WALL.192	WA	33	8	3	5	131.667	63.0752	0.818085	3184
HOH	2019	329	GELB.A220	GB	32	8	3	5	135	71.5497	0.354648	2867.1
HOH	2019	330	P069	ED	31	8	NA	NA	NA	100	NA	NA
HOH	2019	331	S067	ED	30	8	0	5	133.333	71.2739	2.54483	2757.5
HOH	2019	332	GELB.A213	GB	29	8	6	NA	166.667	71.4853	1.53753	2918.9
HOH	2019	333	F062	EF	28	8	8	3	160	70.324	0.802631	3138.3
HOH	2019	334	CAMP.130	CG	27	8	4	3	123.333	69.5706	1.34712	2818.1
HOH	2019	335	WALL.169	WA	26	8	10	5	156.667	100	NA	NA
HOH	2019	336	D152	EF	25	8	1	5	153.333	72.1871	2.27113	3509
HOH	2019	337	F096	EF	24	8	3	3	163.333	NA	NA	3040.2
HOH	2019	338	P209	ED	23	8	-1	5	140	69.7887	4.41925	2943.4
HOH	2019	339	F182	EF	22	8	2	5	176.667	72.6217	4.09489	3178.8
HOH	2019	340	P083	ED	21	8	5	5	151.667	58.7782	2.34731	2481.7
HOH	2019	341	SATU.137	SM	20	8	3	3	130	68.6261	0.167791	3060.1
HOH	2019	342	WALL.122	WA	19	8	1	3	125	75.5314	0.256177	3211.6
HOH	2019	343	WALL.178	WA	18	8	5	7	150	57.8718	0.886886	2951.5
HOH	2019	344	WALL.268	WA	17	8	1	7	133.333	72.8016	1.80815	3039.8
HOH	2019	345	GELB.122	GB	16	8	2	NA	140	74.0095	0.23387	2750.8
HOH	2019	346	GELB.135	GB	15	8	5	7	150	73.303	0.59632	3060.2
HOH	2019	347	WALL.179	WA	14	8	12	7	156.667	62.5668	0.601684	2900.5
HOH	2019	348	P261	ED	13	8	2	5	186.667	85.6814	2.98057	2848.1
HOH	2019	349	STRE.211	SF	12	8	3	3	140	63.0386	0.42488	3104
HOH	2019	350	P396	ED	11	8	2	3	181.667	65.8381	6.14785	2202.2
HOH	2019	351	F121	EF	10	8	4	5	175.667	72.3524	2.35495	3290.5
HOH	2019	352	WALL.251	WA	9	8	5	5	166.667	67.3414	2.45594	3303.6
HOH	2019	353	P219	ED	8	8	0	5	171.667	67.673	5.77747	2484.8
HOH	2019	354	GELB.116	GB	7	8	4	5	160	67.6731	0.279039	3153.8
HOH	2019	355	L043	EF	6	8	0	5	176.667	72.9667	4.06181	3186.1
HOH	2019	356	P127	ED	5	8	2	3	173.333	70.6325	4.30069	2575
HOH	2019	357	L012	EF	4	8	4	5	201.333	62.9847	5.37008	2943
HOH	2019	358	D142	EF	3	8	5	7	186	67.6089	2.20957	3026.9
HOH	2019	359	CAMP.306	CG	2	8	2	3	134.333	63.5959	0.831198	2849.9
HOH	2019	360	SATU.256	SM	1	8	6	5	176	68.3991	5.22717	3132.6
HOH	2019	361	P212	ED	1	9	2	5	179.333	72.4516	3.59976	2959.1
HOH	2019	362	F105	EF	2	9	3	5	160	67.2602	3.75245	3235.7
HOH	2019	363	F134	EF	3	9	4	3	148.667	72.6424	1.55104	2522.2
HOH	2019	364	STRE.130	SF	4	9	5	5	140	75.3241	1.15961	3069.1
HOH	2019	365	SATU.263	SM	5	9	4	5	114	68.7882	1.21606	2863
HOH	2019	366	STRE.198	SF	6	9	6	5	161.667	71.7576	0.601449	3250.5
HOH	2019	367	WALL.001	WA	7	9	3	3	123.333	70.7788	2.31081	3297.8
HOH	2019	368	STGA.168	RT	8	9	3	5	128.333	73.7457	0.389008	3261
HOH	2019	369	SATU.161	SM	9	9	2	3	136.667	73.4223	1.62618	2785.5
HOH	2019	370	SATU.238	SM	10	9	0	1	115	61.5995	0.167859	2794.7
HOH	2019	371	P239	ED	11	9	0	5	176.667	70.3676	3.0787	2792.4
HOH	2019	372	P072	ED	12	9	-1	5	173.333	71.7175	3.29542	2727.1
HOH	2019	373	WALL.213	WA	13	9	7	5	135	69.9496	0.419931	2810.1
HOH	2019	374	SATU.176	SM	14	9	4	7	159.333	66.6589	5.10152	2687.2
HOH	2019	375	SATU.128	SM	15	9	14	3	164	67.3263	0.731163	2897.5
HOH	2019	376	STGA.115	RT	16	9	1	5	135.667	72.8494	0.993059	3011.1
HOH	2019	377	L054	EF	17	9	1	5	169	NA	NA	3180.9
HOH	2019	378	SATU.149	SM	18	9	12	NA	152	78.5024	0.644636	2964.6
HOH	2019	379	F034	EF	19	9	3	7	170.333	76.3885	3.58555	3312.1
HOH	2019	380	SATU.237	SM	20	9	4	5	157.667	67.3436	2.14164	3047.6
HOH	2019	381	F217	EF	21	9	0	5	140	73.5903	2.19949	2995.9
HOH	2019	382	P357	ED	22	9	2	5	162.667	71.7934	6.05793	2632.5
HOH	2019	383	WALL.197	WA	23	9	1	5	142	74.3552	0.341538	3391
HOH	2019	384	WALL.014	WA	24	9	0	3	164.667	75.3712	1.98955	3012.9
HOH	2019	385	P284	ED	25	9	1	3	187.667	57.4051	1.82022	2597
HOH	2019	386	P048	ED	26	9	2	5	142.667	72.6862	4.37462	2527.8
HOH	2019	387	STRE.197	SF	27	9	-1	5	160	75.3033	3.95455	3152.6
HOH	2019	388	SATU.233	SM	28	9	NA	1	NA	100	NA	NA
HOH	2019	389	STGA.161	RT	29	9	2	5	135	72.2621	1.24893	3059.7
HOH	2019	390	SATU.229	SM	30	9	NA	1	NA	100	NA	NA
HOH	2019	391	STRE.209	SF	31	9	8	5	166.667	67.4478	0.221454	3027.9
HOH	2019	392	WALL.216	WA	32	9	NA	3	158.333	61.6743	0.134656	2739
HOH	2019	393	F148	EF	33	9	5	3	172	61.2465	0.361967	3111.7
HOH	2019	394	F173	EF	34	9	3	5	163	73.4058	2.96511	3267.2
HOH	2019	395	STGA.182	RT	35	9	4	7	103.333	73.5187	0.472235	3205.9
HOH	2019	396	STRE.219	SF	36	9	8	3	130	69.4915	0.280514	3633.9
HOH	2019	397	WALL.191	WA	37	9	7	5	155.333	68.5555	0.903333	2920.7
HOH	2019	398	STGA.136	RT	38	9	5	3	104.333	65.4018	0.147045	2751.9
HOH	2019	399	P034	ED	39	9	3	5	175	72.3072	4.33229	2674.5
HOH	2019	400	SATU.104	SM	40	9	NA	3	95	100	NA	NA
HOH	2019	401	P115	ED	41	9	4	5	157.667	67.2562	1.27731	2597
HOH	2019	402	F043	EF	42	9	2	5	158.333	70.0433	3.45816	3296
HOH	2019	403	P188	ED	43	9	0	3	144.333	69.0394	2.39164	2752.7
HOH	2019	404	F060	EF	44	9	2	5	145.667	72.583	3.31983	2912.2
HOH	2019	405	F110	EF	45	9	1	5	137.333	75.9899	2.77021	3409.4
HOH	2019	406	CAMP.141	CG	45	10	2	5	162.667	100	NA	NA
HOH	2019	407	STRE.138	SF	44	10	2	3	136	72.3937	0.207649	3298.2
HOH	2019	408	STRE.303	SF	43	10	3	7	135	68.5371	0.597072	2876.9
HOH	2019	409	WALL.154	WA	42	10	1	5	158	75.0224	1.18698	3054.1
HOH	2019	410	STRE.213	SF	41	10	2	5	115.333	100	NA	NA
HOH	2019	411	STRE.306	SF	40	10	-2	3	121	78.861	0.136824	2963.2
HOH	2019	412	GELB.157	GB	39	10	8	5	158.333	67.3008	2.74475	2646
HOH	2019	413	P136	ED	38	10	1	5	145.667	66.6418	4.73268	2250.3
HOH	2019	414	S064	ED	37	10	1	5	146.667	67.3999	3.89774	2256.5
HOH	2019	415	STGA.303	RT	36	10	4	7	126.667	75.195	1.01739	3032.6
HOH	2019	416	F056	EF	35	10	4	5	136	71.0667	3.04331	3304.2
HOH	2019	417	WALL.303	WA	34	10	10	NA	133.333	60.4092	1.20698	2802.9
HOH	2019	418	GELB.155	GB	33	10	5	5	131.667	67.4491	0.36164	2752
HOH	2019	419	P342	ED	32	10	3	5	172.667	61.8367	5.85079	2652.4
HOH	2019	420	F198	EF	31	10	6	3	136.667	74.2188	0.317656	2764.1
HOH	2019	421	WALL.309	WA	30	10	5	5	123.667	70.4797	0.698924	3111
HOH	2019	422	F240	EF	29	10	1	5	169	71.2614	2.31968	2866.8
HOH	2019	423	SATU.258	SM	28	10	12	3	135.333	66.9628	0.603558	3181.8
HOH	2019	424	F084	EF	27	10	0	5	164.667	76.2805	4.16619	2895.7
HOH	2019	425	P150	ED	26	10	2	3	163.667	68.8104	4.78668	2508
HOH	2019	426	P104	ED	25	10	-3	5	173.333	78.1288	4.01204	2409.6
HOH	2019	427	F012	EF	24	10	1	5	147.667	75.9281	3.42992	2690.7
HOH	2019	428	WALL.318	WA	23	10	3	3	156.667	69.6362	0.89703	3268.1
HOH	2019	429	WALL.006	WA	22	10	3	5	149.333	69.6721	0.751762	2929.3
HOH	2019	430	P167	ED	21	10	1	3	201.667	55.0432	3.50946	2285.4
HOH	2019	431	STRE.127	SF	20	10	2	5	166.333	71.7172	1.29808	2671
HOH	2019	432	STRE.187	SF	19	10	3	7	163.333	75.1272	0.369501	3064.7
HOH	2019	433	SATU.217	SM	18	10	-1	3	105.333	75.7097	2.06309	2865
HOH	2019	434	F159	EF	17	10	4	5	160	74.043	1.89081	3000.5
HOH	2019	435	STRE.176	SF	16	10	2	5	160	74.9489	1.60341	3023.9
HOH	2019	436	GELB.A127	GB	15	10	3	7	211.667	72.665	1.31572	3088.2
HOH	2019	437	WALL.195	WA	14	10	9	5	191.333	67.7807	1.45491	2994
HOH	2019	438	P352	ED	13	10	1	5	146.667	67.5107	6.77673	2614.1
HOH	2019	439	F262	EF	12	10	5	5	181	64.6024	3.49488	3052.4
HOH	2019	440	STRE.305	SF	11	10	2	7	159	72.9339	0.553933	2942
HOH	2019	441	P001	ED	10	10	5	5	160	62.2315	5.14551	2535.6
HOH	2019	442	F160	EF	9	10	2	3	136	72.7088	0.822821	2944.7
HOH	2019	443	P092	ED	8	10	2	3	146.667	68.2667	2.47433	2894.1
HOH	2019	444	F142	EF	7	10	1	3	128.333	75.1047	2.83808	2951.3
HOH	2019	445	P299	ED	6	10	4	3	122.333	62.1628	3.83648	2882.9
HOH	2019	446	F094	EF	5	10	1	3	135.667	72.1006	0.507348	3227.2
HOH	2019	447	SATU.268	SM	4	10	3	3	140.333	65.4134	1.63533	2936.4
HOH	2019	448	P275	ED	3	10	2	5	188.333	60.7589	6.32379	3052.8
HOH	2019	449	WALL.209	WA	2	10	7	NA	134	69.7608	1.34941	3282
HOH	2019	450	WALL.168	WA	1	10	5	5	129.667	72.9456	2.86141	2833.1
HOH	2019	451	P420	ED	1	11	3	3	172	68.9546	4.17141	2527.8
HOH	2019	452	STRE.119	SF	2	11	7	3	126	68.3992	0.649337	3104.8
HOH	2019	453	CAMP.303	CG	3	11	4	NA	144.333	68.6332	0.478717	2975
HOH	2019	454	WALL.285	WA	4	11	3	5	114.333	72.0868	1.68143	3204.5
HOH	2019	455	SATU.278	SM	5	11	2	5	195.333	72.5954	4.46207	3222.9
HOH	2019	456	GELB.157	GB	6	11	5	5	168.667	66.9552	2.35046	2774.5
HOH	2019	457	STRE.201	SF	7	11	0	3	147	100	NA	NA
HOH	2019	458	D152	EF	8	11	2	3	140.333	72.9524	3.12564	3435.7
HOH	2019	459	STRE.158	SF	9	11	3	5	150.667	77.794	1.57883	3146.4
HOH	2019	460	SATU.280	SM	10	11	2	5	120.667	60.5665	1.70323	2753.2
HOH	2019	461	P272	ED	11	11	-1	3	201.667	57.8116	2.83075	2410.4
HOH	2019	462	GELB.138	GB	12	11	2	3	151	71.7719	0.590204	2796.7
HOH	2019	463	SATU.104	SM	13	11	NA	NA	94.6667	100	NA	NA
HOH	2019	464	SATU.004	SM	14	11	1	NA	122.667	75.3566	1.90815	2890.3
HOH	2019	465	WALL.156	WA	15	11	4	5	163.333	74.2337	0.505037	3267.1
HOH	2019	466	F005	EF	16	11	3	7	185	72.968	4.63687	2769.6
HOH	2019	467	WALL.006	WA	17	11	2	5	147.667	74.072	0.647389	3239
HOH	2019	468	F056	EF	18	11	2	5	153	71.0545	2.895	3461.6
HOH	2019	469	P357	ED	19	11	1	5	160	30.4269	2.53826	3061.3
HOH	2019	470	GELB.A125	GB	20	11	1	5	128.667	71.6046	0.589186	2917.8
HOH	2019	471	F121	EF	21	11	2	3	155	73.4789	1.17187	3095.2
HOH	2019	472	STRE.179	SF	22	11	2	3	147.667	100	NA	NA
HOH	2019	473	SATU.255	SM	23	11	19	3	182	43.2597	0.22733	2830.5
HOH	2019	474	WALL.268	WA	24	11	1	5	136.333	73.3713	1.51206	3202.3
HOH	2019	475	P108	ED	25	11	1	5	158	70.3135	4.37303	2544
HOH	2019	476	P223	ED	26	11	-1	5	161.667	67.5551	3.96121	3109.3
HOH	2019	477	CAMP.302	CG	27	11	3	NA	161.333	74.5329	1.06992	3295.2
HOH	2019	478	CAMP.126	CG	28	11	1	5	156	78.7186	1.28574	3391.9
HOH	2019	479	P385	ED	29	11	4	5	156.667	73.9615	3.29942	3030.2
HOH	2019	480	WALL.195	WA	30	11	12	5	167	66.8291	0.837926	2991.4
HOH	2019	481	F207	EF	31	11	2	5	162.667	71.2166	3.52629	3023.3
HOH	2019	482	F160	EF	32	11	4	5	137.667	73.2384	1.30316	3115.1
HOH	2019	483	STGA.136	RT	33	11	6	5	124	100	NA	NA
HOH	2019	484	WALL.149	WA	34	11	10	5	120.333	100	NA	NA
HOH	2019	485	STRE.109	SF	35	11	2	5	151	73.8659	1.32872	2987.4
HOH	2019	486	FV7	EF	36	11	2	3	124.667	74.3976	2.98124	2936.3
HOH	2019	487	SATU.269	SM	37	11	7	3	140.333	73.5453	1.43536	2928.5
HOH	2019	488	GELB.A220	GB	38	11	1	5	155	70.1654	0.856603	2986.8
HOH	2019	489	STGA.182	RT	39	11	3	5	116.667	73.9873	0.665023	3331.6
HOH	2019	490	GELB.A216	GB	40	11	4	5	152.667	75.0227	0.902773	3025.7
HOH	2019	491	P396	ED	41	11	3	3	185.333	69.2808	5.36545	2352.1
HOH	2019	492	STRE.165	SF	42	11	3	5	159.333	NA	NA	2739.3
HOH	2019	493	P092	ED	43	11	2	3	158	71.4176	2.40058	2928.9
HOH	2019	494	WALL.297	WA	44	11	5	5	143.667	68.2497	2.36769	3019.3
HOH	2019	495	WALL.318	WA	45	11	3	3	159.667	70.9566	0.68485	3135.5
HOH	2019	496	F045	EF	45	12	1	5	167	71.3725	4.73628	2887.6
HOH	2019	497	WALL.128	WA	44	12	9	5	166	64.4772	0.783506	3385.1
HOH	2019	498	F052	EF	43	12	1	5	144	72.265	3.99939	3033.6
HOH	2019	499	GELB.129	GB	42	12	8	7	174.333	68.7225	0.416115	2765.3
HOH	2019	500	SATU.248	SM	41	12	2	5	119.667	69.3271	1.87657	2856
HOH	2019	501	F198	EF	40	12	8	3	150	73.6872	0.218605	3174.3
HOH	2019	502	STRE.187	SF	39	12	3	5	155	77.0282	0.291552	3283.2
HOH	2019	503	WALL.172	WA	38	12	8	5	150	62.763	0.333585	2988.8
HOH	2019	504	F040	EF	37	12	0	5	156.667	78.258	3.80778	3073.3
HOH	2019	505	P080	ED	36	12	1	5	183.333	71.0907	5.46213	2765.5
HOH	2019	506	WALL.184	WA	35	12	8	5	136.333	67.6443	1.14409	3641.8
HOH	2019	507	P362	ED	34	12	1	5	117	80.0455	3.39713	2950.4
HOH	2019	508	SATU.290	SM	33	12	2	3	139	73.4593	1.67634	3132
HOH	2019	509	F266	EF	32	12	7	5	166.667	58.7725	2.25784	2858.3
HOH	2019	510	P275	ED	31	12	2	5	212.667	60.2484	6.34426	2588.1
HOH	2019	511	S028	ED	30	12	0	5	178.667	70.7444	2.86314	2640.3
HOH	2019	512	STGA.172	RT	29	12	3	7	126.333	73.3316	1.2635	3118.9
HOH	2019	513	SATU.243	SM	28	12	2	5	144	67.3077	1.37375	3162.3
HOH	2019	514	WALL.179	WA	27	12	11	5	136.667	65.2605	0.956066	2968
HOH	2019	515	STGA.115	RT	26	12	2	5	145	69.4783	0.133861	2902.9
HOH	2019	516	STGA.161	RT	25	12	4	7	140.333	71.1125	1.58901	2937.3
HOH	2019	517	F099	EF	24	12	2	5	182.667	67.3423	4.3483	3194.3
HOH	2019	518	L012	EF	23	12	4	5	198	63.5887	3.42605	3087.8
HOH	2019	519	WALL.251	WA	22	12	2	5	165	68.9786	2.44506	3348.7
HOH	2019	520	P102	ED	21	12	-3	5	151.667	NA	4.6036	2881
HOH	2019	521	P096	ED	20	12	1	3	134.333	67.7924	5.00229	2698.3
HOH	2019	522	SATU.242	SM	19	12	NA	1	119.333	68.7915	0.173355	2526.1
HOH	2019	523	GELB.148	GB	18	12	4	3	142.667	67.3315	0.4445	2866.2
HOH	2019	524	F145	EF	17	12	0	5	178.667	72.4174	5.35853	3145.9
HOH	2019	525	P069	ED	16	12	-1	3	189	69.6578	0.18053	3160.9
HOH	2019	526	WALL.304	WA	15	12	13	5	144	63.1807	0.267255	3006.6
HOH	2019	527	F151	EF	14	12	4	3	155	72.1615	3.43886	2828.8
HOH	2019	528	STGA.104	RT	13	12	1	5	107.333	75.9437	0.531353	3334.6
HOH	2019	529	SATU.186	SM	12	12	3	5	130.667	72.1665	1.30453	2853
HOH	2019	530	WALL.175	WA	11	12	7	NA	114.667	69.7996	0.608769	3165.2
HOH	2019	531	WALL.316	WA	10	12	7	7	166	65.7715	1.48084	2857.1
HOH	2019	532	SATU.170	SM	9	12	NA	1	92.6667	47.8692	0.136746	3140
HOH	2019	533	SATU.013	SM	8	12	2	3	152	70.5044	2.31231	2923.1
HOH	2019	534	P024	ED	7	12	0	5	156	62.4201	4.7562	2797.7
HOH	2019	535	STRE.211	SF	6	12	3	3	132.667	58.3041	0.277042	3247
HOH	2019	536	L050	EF	5	12	-2	3	181.333	63.9779	4.63392	2960.1
HOH	2019	537	WALL.163	WA	4	12	6	3	128	62.1951	0.524512	3127.9
HOH	2019	538	L060	EF	3	12	1	5	160	70.6168	3.03947	2508.1
HOH	2019	539	STRE.163	SF	2	12	2	5	138	64.5216	2.1291	2947.5
HOH	2019	540	SATU.135	SM	1	12	3	5	175.667	67.7585	4.17268	2894.9
HOH	2019	541	F012	EF	1	13	0	5	145.333	73.9975	1.15966	3079.1
HOH	2019	542	WALL.219	WA	2	13	5	5	132.333	75.5344	0.779641	3167.2
HOH	2019	543	GELB.133	GB	3	13	7	5	186.333	68.1519	1.866	2549.4
HOH	2019	544	WALL.113	WA	4	13	2	3	130.333	64.629	0.255285	3150.8
HOH	2019	545	STRE.176	SF	5	13	3	5	135.333	71.9431	1.92436	3070.8
HOH	2019	546	SATU.128	SM	6	13	8	NA	163	69.4697	0.937956	2729.9
HOH	2019	547	P159	ED	7	13	6	3	149.333	66.5515	3.4213	2702.3
HOH	2019	548	STRE.209	SF	8	13	5	3	203.333	69.5753	0.250935	3318.6
HOH	2019	549	F104	EF	9	13	2	5	153.333	71.6408	3.8015	2851.5
HOH	2019	550	P344	ED	10	13	6	3	190	56.5461	3.16865	2505.7
HOH	2019	551	F260	EF	11	13	2	3	165	74.056	2.33918	2901.8
HOH	2019	552	F023	EF	12	13	3	5	166.667	69.5068	3.76704	2827.6
HOH	2019	553	STGA.173	RT	13	13	3	5	110	71.8588	1.16639	3003.9
HOH	2019	554	WALL.108	WA	14	13	3	5	159	68.8263	1.42574	3263.9
HOH	2019	555	WALL.317	WA	15	13	2	NA	153	68.7341	2.21805	2922.5
HOH	2019	556	STGA.151	RT	16	13	2	5	133.333	78.5594	0.95633	3176.2
HOH	2019	557	F110	EF	17	13	0	5	146.333	74.7769	2.65234	3625.3
HOH	2019	558	D171	EF	18	13	1	5	146.667	74.4833	3.46112	2893.9
HOH	2019	559	P087	ED	19	13	1	3	143.667	71.6094	4.54433	2368.7
HOH	2019	560	F147	EF	20	13	2	5	155.667	72.6706	3.9597	3050.5
HOH	2019	561	SATU.218	SM	21	13	5	3	122.667	69.0758	1.63698	2936.1
HOH	2019	562	F034	EF	22	13	2	5	172	75.9082	4.64318	3350.9
HOH	2019	563	P075	ED	23	13	5	5	178	71.2289	5.05891	2607.4
HOH	2019	564	F137	EF	24	13	1	5	175.667	72.1128	2.70134	3132.3
HOH	2019	565	STRE.155	SF	25	13	2	5	151	76.2752	0.581598	3089.9
HOH	2019	566	F201	EF	26	13	2	5	161.667	70.8972	4.32827	3144.7
HOH	2019	567	P219	ED	27	13	1	5	167.333	70.1777	5.1818	2666.7
HOH	2019	568	SATU.141	SM	28	13	7	5	163	67.8353	2.32539	2611.9
HOH	2019	569	STRE.219	SF	29	13	8	5	147.667	67.887	0.808082	3203.3
HOH	2019	570	WALL.104	WA	30	13	17	5	166.667	60.5606	0.30361	3302.3
HOH	2019	571	F159	EF	31	13	3	5	142.667	74.359	2.23275	3006.1
HOH	2019	572	P083	ED	32	13	6	5	157	60.5369	2.06956	2586.5
HOH	2019	573	WALL.215	WA	33	13	4	NA	159.667	77.8273	0.674244	3189.6
HOH	2019	574	SATU.165	SM	34	13	5	NA	135	69.3859	0.251524	3275.3
HOH	2019	575	P065	ED	35	13	2	5	193	68.4607	4.24148	2616.1
HOH	2019	576	WALL.169	WA	36	13	7	5	171.667	72.719	0.267242	2811.2
HOH	2019	577	WALL.168	WA	37	13	4	5	136	74.893	3.0087	2784
HOH	2019	578	WALL.174	WA	38	13	1	5	143.333	68.1758	0.721073	3212.2
HOH	2019	579	WALL.154	WA	39	13	0	5	162	75.038	1.09055	2751.5
HOH	2019	580	STRE.127	SF	40	13	3	5	157.667	72.9422	0.638244	2722.6
HOH	2019	581	SATU.223	SM	41	13	0	NA	77	100	NA	NA
HOH	2019	582	P066	ED	42	13	0	3	173	74.1634	3.38729	2611
HOH	2019	583	F105	EF	43	13	4	5	160.667	70.2234	3.65208	2936.5
HOH	2019	584	WALL.191	WA	44	13	7	5	165.333	69.234	1.3631	2888.4
HOH	2019	585	GELB.149	GB	45	13	2	5	160	73.7374	0.171562	2866.8
HOH	2019	586	D142	EF	45	14	4	7	188	69.0197	1.57871	2878.6
HOH	2019	587	WALL.269	WA	44	14	4	5	137.333	76.284	0.338065	3149.9
HOH	2019	588	F103	EF	43	14	1	3	151.667	73.5294	1.53199	3609.2
HOH	2019	589	CAMP.130	CG	42	14	4	3	124	72.4704	0.735574	2661.1
HOH	2019	590	SATU.228	SM	41	14	4	5	142	76.9303	1.6549	2594.4
HOH	2019	591	GELB.A115	GB	40	14	6	7	211	71.3857	0.199642	2791.2
HOH	2019	592	GELB.158	GB	39	14	7	7	186	NA	NA	2782.7
HOH	2019	593	STGA.171	RT	38	14	4	5	123	75.1472	0.705131	3534.9
HOH	2019	594	GELB.A106	GB	37	14	2	5	170	71.3357	2.8287	3172
HOH	2019	595	P127	ED	36	14	1	5	178.333	74.8608	4.13082	2537.3
HOH	2019	596	P053	ED	35	14	0	5	174.667	66.9339	5.23077	2221.1
HOH	2019	597	F136	EF	34	14	2	7	171	70.8755	3.87925	3165.2
HOH	2019	598	CAMP.303	CG	33	14	2	NA	155.667	70.4828	0.322341	3389.8
HOH	2019	599	P085	ED	32	14	2	3	155	70.017	2.77792	3117.7
HOH	2019	600	SATU.264	SM	31	14	2	3	157	70.5243	2.44414	3338.7
HOH	2019	601	WALL.189	WA	30	14	2	3	146	67.2045	0.501905	3112.3
HOH	2019	602	L056	EF	29	14	3	5	163.333	68.6606	2.92048	2861.3
HOH	2019	603	L051	EF	28	14	0	5	167.333	75.4248	4.93165	3033.5
HOH	2019	604	STRE.138	SF	27	14	5	3	165.333	70.5624	0.42949	2956.6
HOH	2019	605	F162	EF	26	14	1	5	189.333	67.4548	6.83868	2932.4
HOH	2019	606	D150	EF	25	14	0	5	161	75.6793	3.62239	2872.8
HOH	2019	607	STRE.167	SF	24	14	1	5	150.667	75.3468	0.56598	3052.4
HOH	2019	608	P184	ED	23	14	1	3	136.667	68.1366	3.88583	2566.5
HOH	2019	609	GELB.121	GB	22	14	3	9	216.667	73.9498	8.44531	3024.6
HOH	2019	610	F030	EF	21	14	0	5	165	68.0079	4.81723	2902.7
HOH	2019	611	SATU.182	SM	20	14	6	5	212.333	71.5968	0.324453	2772.2
HOH	2019	612	P290	ED	19	14	0	5	198.667	67.2162	7.50839	2879.3
HOH	2019	613	SATU.183	SM	18	14	3	3	188.667	63.1254	2.52018	3008.8
HOH	2019	614	P410	ED	17	14	2	3	213.333	55.9314	1.43212	2604.6
HOH	2019	615	STRE.208	SF	16	14	0	NA	150.667	73.1164	0.669625	3038.3
HOH	2019	616	P006	ED	15	14	5	5	156.667	67.5952	2.55668	2742.7
HOH	2019	617	STRE.305	SF	14	14	2	7	170.333	70.4705	0.492589	2800.4
HOH	2019	618	P342	ED	13	14	2	3	196.667	61.9496	5.86425	2609.9
HOH	2019	619	P353	ED	12	14	0	5	134.333	67.3147	6.38817	2453
HOH	2019	620	S046	ED	11	14	-1	3	166.333	71.1589	5.44662	2475.2
HOH	2019	621	SATU.152	SM	10	14	8	3	143	64.8591	3.10643	2791.6
HOH	2019	622	SATU.137	SM	9	14	1	3	159.333	67.2835	0.417942	3289.5
HOH	2019	623	WALL.182	WA	8	14	1	5	161	68.796	1.60616	3288.2
HOH	2019	624	SATU.194	SM	7	14	NA	1	NA	100	NA	NA
HOH	2019	625	P261	ED	6	14	-2	5	188.333	67.8331	3.22072	2683.6
HOH	2019	626	WALL.141	WA	5	14	6	5	170.667	68.1493	0.714432	2848.9
HOH	2019	627	WALL.296	WA	4	14	3	5	150	62.6959	1.59237	2944.8
HOH	2019	628	F195	EF	3	14	1	3	162.333	74.2662	2.66554	3013.8
HOH	2019	629	WALL.134	WA	2	14	3	5	148.667	74.2103	0.720087	3316
HOH	2019	630	GELB.A213	GB	1	14	6	NA	159	65.6848	0.552957	2852.8
HOH	2019	631	SATU.292	SM	1	15	NA	NA	105	100	NA	NA
HOH	2019	632	P034	ED	2	15	3	5	188.667	70.9172	4.2756	2581.4
HOH	2019	633	GELB.135	GB	3	15	3	7	158.333	67.0688	1.78895	2897.1
HOH	2019	634	P074	ED	4	15	3	3	168.333	62.669	2.36074	2766.5
HOH	2019	635	SATU.162	SM	5	15	2	3	106.667	69.9421	1.7285	2401.2
HOH	2019	636	P250	ED	6	15	3	3	154	63.6202	4.76695	2605.3
HOH	2019	637	P122	ED	7	15	4	5	160	69.9904	2.45958	2386.1
HOH	2019	638	GELB.116	GB	8	15	4	5	160.667	71.0983	0.533948	3062.7
HOH	2019	639	STGA.303	RT	9	15	4	7	120	74.7308	1.09144	3162.6
HOH	2019	640	STRE.307	SF	10	15	3	5	151.667	66.765	0.738866	2861.1
HOH	2019	641	SATU.130	SM	11	15	6	5	160	67.5809	3.76257	2725.9
HOH	2019	642	STGA.108	RT	12	15	0	NA	121.667	72.6967	1.05277	3369.7
HOH	2019	643	WALL.192	WA	13	15	3	5	140	69.0116	0.948449	3070.8
HOH	2019	644	GELB.155	GB	14	15	4	5	134	68.4642	0.389562	2639.6
HOH	2019	645	P312	ED	15	15	1	5	153.333	64.3997	6.79631	2802.2
HOH	2019	646	GELB.A119	GB	16	15	7	5	149	71.7669	1.61224	3423.1
HOH	2019	647	WALL.001	WA	17	15	1	5	135	72.1417	2.70399	3444
HOH	2019	648	STRE.215	SF	18	15	1	7	176.667	74.0835	2.04285	2923
HOH	2019	649	GELB.A122	GB	19	15	0	5	140	70.6821	0.597499	3356.7
HOH	2019	650	STGA.150	RT	20	15	2	5	150	77.8536	0.662923	3383.3
HOH	2019	651	P105	ED	21	15	-3	3	160	78.2039	3.62905	2728.9
HOH	2019	652	STRE.192	SF	22	15	1	3	117.5	71.0577	0.306733	2747.2
HOH	2019	653	STRE.174	SF	23	15	2	NA	146.667	71.8568	0.452578	2837.4
HOH	2019	654	SATU.217	SM	24	15	-1	3	100	76.6292	2.12263	2837.7
HOH	2019	655	STRE.172	SF	25	15	2	NA	149	80.0358	3.65377	2616
HOH	2019	656	SATU.277	SM	26	15	4	NA	95	65.2406	0.343275	2878.4
HOH	2019	657	SATU.212	SM	27	15	6	3	170.667	69.3078	1.24662	3346.7
HOH	2019	658	S067	ED	28	15	1	3	154	72.0078	5.44511	2760
HOH	2019	659	F109	EF	29	15	4	3	151	68.2418	2.1611	2680.1
HOH	2019	660	WALL.271	WA	30	15	1	5	135.667	72.7814	0.223439	3047.1
HOH	2019	661	SATU.233	SM	31	15	NA	1	NA	100	NA	NA
HOH	2019	662	P120	ED	32	15	5	5	171.667	62.2744	4.12713	2519.7
HOH	2019	663	STRE.306	SF	33	15	-2	3	161.667	79.5739	1.29546	2797
HOH	2019	664	SATU.149	SM	34	15	3	NA	155.667	79.3783	1.98684	2766.9
HOH	2019	665	SATU.159	SM	35	15	0	5	125.667	74.2489	2.42052	2803
HOH	2019	666	SATU.240	SM	36	15	4	5	134.667	63.8919	4.18609	2680.3
HOH	2019	667	SATU.176	SM	37	15	4	7	166.667	68.6982	4.8841	2607.9
HOH	2019	668	F161	EF	38	15	4	5	208.333	64.6448	4.08081	2647.3
HOH	2019	669	P317	ED	39	15	2	5	158.333	76.8321	4.82454	2812.2
HOH	2019	670	STGA.101	RT	40	15	2	3	131.667	71.2638	0.258688	3095.8
HOH	2019	671	F117	EF	41	15	6	5	164	62.0579	1.20692	2950.9
HOH	2019	672	GELB.A121	GB	42	15	7	5	173.667	62.3928	0.255083	2698.8
HOH	2019	673	WALL.165	WA	43	15	3	NA	141.667	71.6588	0.252717	3072.9
HOH	2019	674	STRE.156	SF	44	15	0	5	140.667	76.8356	1.29711	2918.2
HOH	2019	675	F148	EF	45	15	1	3	198.333	67.5566	0.987564	3139.9
HOH	2019	676	F252	EF	45	16	8	5	184.333	69.4663	1.34765	2987
HOH	2019	677	GELB.A127	GB	44	16	4	7	213.333	85.1052	1.51275	2854.4
HOH	2019	678	STRE.146	SF	43	16	3	5	147.333	71.6708	3.42037	2859.6
HOH	2019	679	SATU.151	SM	42	16	NA	1	93.3333	57.8704	0.27093	2747.4
HOH	2019	680	F084	EF	41	16	1	5	163.333	75.0658	4.20406	2899.5
HOH	2019	681	P284	ED	40	16	1	3	189.667	60.0193	0.208467	2376.1
HOH	2019	682	WALL.270	WA	39	16	6	3	135	75.4527	0.188003	2750.8
HOH	2019	683	F087	EF	38	16	2	5	136.333	78.8162	2.42478	2683.1
HOH	2019	684	F173	EF	37	16	1	5	174	73.4325	3.00192	3186.8
HOH	2019	685	S066	ED	36	16	1	5	158	72.4439	4.02534	2526.1
HOH	2019	686	P154	ED	35	16	1	5	152.333	72.2967	5.56504	2391.8
HOH	2019	687	CAMP.001	CG	34	16	0	5	165	78.1044	0.880367	3504.9
HOH	2019	688	L054	EF	33	16	3	5	168.333	70.234	2.52011	3241.4
HOH	2019	689	SATU.161	SM	32	16	1	3	133.667	74.0503	1.96196	2598.9
HOH	2019	690	WALL.012	WA	31	16	7	NA	135	65.0805	0.690179	3188.4
HOH	2019	691	SATU.116	SM	30	16	2	5	100	72.4442	0.494915	3406
HOH	2019	692	SATU.281	SM	29	16	6	5	124	66.9421	2.56366	2827.3
HOH	2019	693	WALL.218	WA	28	16	3	3	150.667	74.2054	0.304118	3336.5
HOH	2019	694	F096	EF	27	16	3	3	167.333	68.0886	3.23171	3070.9
HOH	2019	695	P064	ED	26	16	NA	1	NA	100	NA	NA
HOH	2019	696	WALL.257	WA	25	16	5	5	143.333	74.6854	0.865106	3006.2
HOH	2019	697	L041	EF	24	16	0	5	170	75.9549	3.18339	3114.9
HOH	2019	698	F106	EF	23	16	4	3	159	68.1219	2.67606	3088.6
HOH	2019	699	STRE.198	SF	22	16	3	5	156.667	76.4979	0.496854	2873.3
HOH	2019	700	P383	ED	21	16	1	5	151.667	69.0282	5.12845	2286.9
HOH	2019	701	F138	EF	20	16	3	3	125	69.5407	2.05887	2938.8
HOH	2019	702	L046	EF	19	16	2	5	154.667	70.9686	3.53554	2725.6
HOH	2019	703	GELB.A102	GB	18	16	8	NA	200	67.5258	0.994204	2601.5
HOH	2019	704	P129	ED	17	16	3	5	148.667	69.3809	3.89978	2560.6
HOH	2019	705	F182	EF	16	16	3	5	163.333	73.1322	3.56776	3314.3
HOH	2019	706	SATU.129	SM	15	16	3	5	155	61.1518	1.6246	2750.8
HOH	2019	707	P422	ED	14	16	3	5	167.333	68.5988	4.23952	2483.4
HOH	2019	708	GELB.143	GB	13	16	0	NA	170	66.1529	0.464614	2899
HOH	2019	709	F154	EF	12	16	2	5	141.667	69.7805	3.93853	2921.2
HOH	2019	710	P001	ED	11	16	5	5	161.667	64.0552	5.20694	2475.5
HOH	2019	711	P304	ED	10	16	1	5	150	73.3014	5.35907	2782.7
HOH	2019	712	CAMP.137	CG	9	16	4	3	156.333	68.1695	0.208599	3524.9
HOH	2019	713	F054	EF	8	16	1	5	159	75.4196	2.80159	2951
HOH	2019	714	P271	ED	7	16	1	5	192.667	60.4827	6.25522	2625.5
HOH	2019	715	WALL.105	WA	6	16	3	5	138.333	72.1331	0.556988	3541
HOH	2019	716	SATU.106	SM	5	16	1	5	132	71.8151	1.59585	2817.1
HOH	2019	717	P165	ED	4	16	3	5	164	66.1086	3.10204	3165.3
HOH	2019	718	WALL.228	WA	3	16	6	3	167.667	68.4344	0.889875	2928
HOH	2019	719	SATU.263	SM	2	16	4	5	111.667	68.2609	2.06102	2720
HOH	2019	720	D107	EF	1	16	4	5	141.667	62.8315	2.07082	3149.4
HOH	2019	721	F088	EF	1	17	3	7	176.667	70.8743	3.73862	2838.8
HOH	2019	722	SATU.203	SM	2	17	NA	1	NA	100	NA	NA
HOH	2019	723	D102	EF	3	17	3	5	136.667	67.9796	1.67071	2921.9
HOH	2019	724	L037	EF	4	17	0	5	173.333	70.0939	4.2054	3044.5
HOH	2019	725	P415	ED	5	17	5	5	181.667	61.4027	1.87872	2542.9
HOH	2019	726	P081	ED	6	17	3	5	164.333	64.4805	1.08188	2899.3
HOH	2019	727	P072	ED	7	17	0	5	160	73.842	3.04857	2686.1
HOH	2019	728	WALL.197	WA	8	17	2	5	124.333	76.9336	0.373641	2922.2
HOH	2019	729	STGA.180	RT	9	17	2	5	117	74.0161	0.259673	3258.8
HOH	2019	730	SATU.008	SM	10	17	3	3	121.667	67.9907	0.144707	2949.3
HOH	2019	731	SATU.229	SM	11	17	NA	1	88.3333	100	NA	NA
HOH	2019	732	F217	EF	12	17	0	5	136.667	70.5603	0.601527	3145.7
HOH	2019	733	SATU.282	SM	13	17	2	NA	140	63.6127	2.32144	3059.2
HOH	2019	734	P330	ED	14	17	2	5	172.667	61.7197	5.26952	2612.3
HOH	2019	735	WALL.260	WA	15	17	9	3	142.667	66.0526	0.294595	2790.1
HOH	2019	736	CAMP.004	CG	16	17	2	3	116.667	78.8798	0.600933	3052.9
HOH	2019	737	WALL.222	WA	17	17	2	NA	136.667	69.0166	0.318512	2698.9
HOH	2019	738	STRE.210	SF	18	17	4	3	166.667	75.3471	0.521653	2978.1
HOH	2019	739	L045	EF	19	17	3	5	183	65.3516	4.80247	2514.9
HOH	2019	740	F062	EF	20	17	9	3	153	68.6708	1.08363	3144.2
HOH	2019	741	CAMP.301	CG	21	17	3	5	160	70.3486	0.320907	3323.1
HOH	2019	742	P110	ED	22	17	-2	5	165	76.7259	3.20395	2684.8
HOH	2019	743	WALL.014	WA	23	17	2	3	160.667	73.2844	0.768753	3138.6
HOH	2019	744	F043	EF	24	17	1	5	169	69.6085	4.30644	2907.9
HOH	2019	745	SATU.270	SM	25	17	-1	5	184.333	66.787	7.1127	2738.3
HOH	2019	746	STRE.142	SF	26	17	0	NA	165.667	75.1278	0.416208	3001.8
HOH	2019	747	GELB.A217	GB	27	17	3	5	143.333	68.1153	0.24056	2799.4
HOH	2019	748	STRE.303	SF	28	17	3	7	141.667	78.0917	2.07607	2944
HOH	2019	749	STRE.205	SF	29	17	2	7	136.667	100	NA	NA
HOH	2019	750	D146	EF	30	17	0	5	155	68.3516	1.63474	3095.9
HOH	2019	751	CAMP.141	CG	31	17	3	5	182.333	100	NA	NA
HOH	2019	752	F259	EF	32	17	13	5	158.333	75.872	1.12796	3267
HOH	2019	753	F047	EF	33	17	3	5	153.333	74.3018	2.95585	3094.4
HOH	2019	754	SATU.245	SM	34	17	-4	NA	100	66.8031	0.244611	2800.1
HOH	2019	755	GELB.A219	GB	35	17	3	5	177.333	69.8529	1.82386	2836.5
HOH	2019	756	F094	EF	36	17	3	3	150	74.6156	1.07372	3173.3
HOH	2019	757	SATU.237	SM	37	17	4	5	155	67.3151	2.00554	2990.1
HOH	2019	758	P140	ED	38	17	-2	5	203.333	68.9928	6.90572	2582.9
HOH	2019	759	S036	ED	39	17	1	5	157.333	75.0069	4.65756	2676.1
HOH	2019	760	P167	ED	40	17	1	3	198.333	59.6182	0.785569	2392.6
HOH	2019	761	CAMP.306	CG	41	17	3	3	126	66.89	0.837798	2836.2
HOH	2019	762	GELB.A203	GB	42	17	1	7	176.667	74.3569	1.57525	2597.4
HOH	2019	763	GELB.124	GB	43	17	-5	NA	172.333	71.9287	3.11679	3059.9
HOH	2019	764	F139.STRE	EF	44	17	2	NA	137.333	NA	NA	2660.3
HOH	2019	765	SATU.238	SM	45	17	NA	NA	95	100	NA	NA
HOH	2019	766	P245	ED	45	18	1	5	166.667	73.97	5.80159	2397.8
HOH	2019	767	P206	ED	44	18	0	5	140	75.3601	4.31436	2823.6
HOH	2019	768	FV2	EF	43	18	0	3	140	70.1318	1.88292	3059.3
HOH	2019	769	SATU.224	SM	42	18	5	NA	151.667	70.6645	0.808874	3039.5
HOH	2019	770	P106	ED	41	18	0	5	171.667	72.988	5.56971	2298.6
HOH	2019	771	WALL.122	WA	40	18	3	3	138.333	100	NA	NA
HOH	2019	772	STRE.220	SF	39	18	-2	7	156.667	73.8253	2.20725	2842.1
HOH	2019	773	GELB.109	GB	38	18	3	5	135.667	73.0629	0.36568	2709.3
HOH	2019	774	WALL.151	WA	37	18	3	3	125	74.1247	0.536292	2821.8
HOH	2019	775	STRE.212	SF	36	18	7	3	135	71.9911	0.429787	2567.1
HOH	2019	776	P354	ED	35	18	2	5	164	76.6216	5.01616	2467.5
HOH	2019	777	P040	ED	34	18	2	3	171.667	62.4785	3.82316	2725.2
HOH	2019	778	P188	ED	33	18	0	3	161.667	67.3805	2.57506	2728.9
HOH	2019	779	L043	EF	32	18	1	5	179	72.4973	4.55404	3004.4
HOH	2019	780	EP1	EF	31	18	4	5	166.667	65.7995	2.82028	3910.5
HOH	2019	781	SATU.105	SM	30	18	NA	1	NA	100	NA	NA
HOH	2019	782	WALL.277	WA	29	18	5	5	125.667	71.571	1.98717	3485.7
HOH	2019	783	SATU.120	SM	28	18	NA	1	113.333	100	NA	NA
HOH	2019	784	P136	ED	27	18	0	5	153.333	67.1594	5.59852	2419.9
HOH	2019	785	F142	EF	26	18	2	3	151.667	77.7778	2.55422	3035.2
HOH	2019	786	STGA.158	RT	25	18	9	3	120	70.4077	0.271304	2958.4
HOH	2019	787	SATU.196	SM	24	18	4	3	121.667	75.075	1.65703	2640
HOH	2019	788	F082	EF	23	18	3	5	173.333	69.4017	2.27094	3125.1
HOH	2019	789	P130	ED	22	18	0	5	181	72.1786	7.63842	2614.3
HOH	2019	790	P115	ED	21	18	3	5	178.333	66.3361	2.49346	2441.4
HOH	2019	791	L035	EF	20	18	0	5	153	69.5819	5.09258	2802.7
HOH	2019	792	F240	EF	19	18	0	5	194.333	68.4173	2.7384	2977.1
HOH	2019	793	P133	ED	18	18	-1	5	176.667	73.7801	4.78907	2699.8
HOH	2019	794	CAMP.104	CG	17	18	5	5	131	68.2182	2.18207	3299.2
HOH	2019	795	SATU.123	SM	16	18	4	3	104.333	71.3884	0.487583	2675.5
HOH	2019	796	P063	ED	15	18	5	5	166.667	64.5315	5.96368	2454.8
HOH	2019	797	WALL.293	WA	14	18	12	5	133.333	66.4514	0.746471	2914.7
HOH	2019	798	L023	EF	13	18	3	5	181	72.0632	2.89922	2888.7
HOH	2019	799	F262	EF	12	18	3	5	153.333	66.9306	3.85476	3207.6
HOH	2019	800	S018	ED	11	18	2	5	181.667	59.346	4.23058	2804.4
HOH	2019	801	SATU.169	SM	10	18	3	5	137.333	66.1333	3.11819	3380.1
HOH	2019	802	GELB.104	GB	9	18	2	5	145	71.8556	1.39891	2772.5
HOH	2019	803	P104	ED	8	18	-1	5	178.333	75.4709	4.92749	2595.3
HOH	2019	804	F060	EF	7	18	1	5	171.667	71.1661	4.44124	2858.1
HOH	2019	805	SATU.235	SM	6	18	12	5	142.667	60.0888	0.478206	2626.5
HOH	2019	806	WALL.150	WA	5	18	9	5	140	74.4129	0.200419	3084.3
HOH	2019	807	P360	ED	4	18	0	5	178.333	73.8639	5.0518	2285.8
HOH	2019	808	P352	ED	3	18	1	5	150.667	66.3826	6.54887	NA
HOH	2019	809	SATU.127	SM	2	18	0	5	144	66.9019	3.58215	2962
HOH	2019	810	STRE.130	SF	1	18	1	5	138.333	74.1139	1.54824	2585.5
HOH	2019	811	P212	ED	1	19	4	5	158.333	70.634	3.17688	2895.5
HOH	2019	812	L016	EF	2	19	5	NA	146.667	62.1676	2.25886	2745.5
HOH	2019	813	SATU.002	SM	3	19	NA	NA	NA	100	NA	2584.8
HOH	2019	814	P351	ED	4	19	1	5	181.667	64.137	4.20311	3287.4
HOH	2019	815	D167	EF	5	19	1	5	176.667	71.9952	1.25572	3390.1
HOH	2019	816	SATU.241	SM	6	19	6	NA	168.333	65.7369	2.52583	3040.7
HOH	2019	817	P289	ED	7	19	2	5	174	64.6004	5.94851	3040.6
HOH	2019	818	GELB.166	GB	8	19	5	5	165	64.8479	0.962019	2868.2
HOH	2019	819	P033	ED	9	19	0	5	143.333	68.584	5.53107	2791.6
HOH	2019	820	F048	EF	10	19	4	5	166.667	78.581	3.73115	3225.7
HOH	2019	821	F108	EF	11	19	3	3	145	70.0074	3.94492	3053.8
HOH	2019	822	STRE.197	SF	12	19	-1	5	160	75.9953	2.69264	3006
HOH	2019	823	SATU.134	SM	13	19	1	3	144.333	77.0758	0.834987	2465.4
HOH	2019	824	F179	EF	14	19	4	5	160	73.5092	2.38795	3003.5
HOH	2019	825	WALL.216	WA	15	19	13	3	156.667	56.9631	0.234403	3070
HOH	2019	826	P299	ED	16	19	3	3	120	63.0645	3.82654	2926
HOH	2019	827	GELB.110	GB	17	19	3	5	111.667	100	NA	NA
HOH	2019	828	SATU.163	SM	18	19	7	5	193.333	62.0273	1.49796	2812.6
HOH	2019	829	WALL.185	WA	19	19	6	5	150.667	71.7785	0.244765	2773.7
HOH	2019	830	F066	EF	20	19	3	3	146.333	73.1848	1.69533	2952.3
HOH	2019	831	STRE.190	SF	21	19	3	5	133.333	71.9098	0.803472	3121.6
HOH	2019	832	WALL.225	WA	22	19	8	5	153.333	56.6803	1.3096	3436.7
HOH	2019	833	GELB.164	GB	23	19	3	7	168.667	73.8581	1.95527	3044.3
HOH	2019	834	P042	ED	24	19	1	5	155	63.8743	5.95543	2886
HOH	2019	835	STGA.128	RT	25	19	4	5	139.333	NA	NA	2729.4
HOH	2019	836	STGA.183	RT	26	19	2	5	126.667	70.9942	0.779517	3178.5
HOH	2019	837	SATU.140	SM	27	19	7	5	127.333	79.0401	0.609136	2762.7
HOH	2019	838	S072	ED	28	19	-2	5	156.667	73.7152	3.20882	2574.2
HOH	2019	839	SATU.014	SM	29	19	2	3	115	70.9633	0.983197	3048.9
HOH	2019	840	P135	ED	30	19	0	5	143.333	72.9045	1.18846	2942.9
HOH	2019	841	SATU.225	SM	31	19	NA	1	83.3333	100	NA	NA
HOH	2019	842	L007	EF	32	19	6	5	175	66.4139	1.17121	2529.5
HOH	2019	843	GELB.A212	GB	33	19	3	5	133.333	74.9466	0.620433	2680.8
HOH	2019	844	F050	EF	34	19	2	5	149	73.9797	4.19428	3022.7
HOH	2019	845	SATU.167	SM	35	19	3	3	131.667	72.7229	1.66026	2942.9
HOH	2019	846	P209	ED	36	19	0	5	135	68.5039	4.41828	2556.6
HOH	2019	847	P150	ED	37	19	1	3	161	69.0853	5.53028	2471.6
HOH	2019	848	P060	ED	38	19	4	3	162.667	72.7006	4.64884	2491.1
HOH	2019	849	F186	EF	39	19	2	5	154.333	76.2183	1.19459	2961.4
HOH	2019	850	F169	EF	40	19	1	5	155	71.9263	4.59298	2916.2
HOH	2019	851	P194	ED	41	19	1	5	140.667	71.1305	4.11359	2614.8
HOH	2019	852	SATU.256	SM	42	19	1	5	156.667	68.875	5.32209	3007
HOH	2019	853	SATU.258	SM	43	19	4	3	116.667	68.5942	0.458895	2893
HOH	2019	854	SATU.268	SM	44	19	3	3	143.333	66.934	2.5532	2616.9
HOH	2019	855	S050	ED	45	19	1	5	181.667	73.5129	6.12987	2243.2
HOH	2019	856	F242	EF	45	20	3	5	203.333	NA	NA	2984.5
HOH	2019	857	WALL.010	WA	44	20	6	5	134	66.1943	1.34474	3138.1
HOH	2019	858	WALL.207	WA	43	20	6	5	147.667	73.0512	1.58984	3014.6
HOH	2019	859	WALL.196	WA	42	20	11	5	150.667	46.6245	0.111588	2627.7
HOH	2019	860	L059	EF	41	20	3	5	153.333	74.123	2.76788	2758.2
HOH	2019	861	P409	ED	40	20	3	3	167.333	62.8142	6.11486	2309.3
HOH	2019	862	STRE.216	SF	39	20	2	5	156.667	73.4198	0.686597	3226.4
HOH	2019	863	WALL.285	WA	38	20	2	7	117.667	73.6977	0.431746	2592.1
HOH	2019	864	S064	ED	37	20	1	5	138.333	70.2116	5.25347	2418.3
HOH	2019	865	CAMP.107	CG	36	20	4	NA	146.667	100	NA	NA
HOH	2019	866	CAMP.117	CG	35	20	0	NA	123.333	79.7935	1.73258	3407.4
HOH	2019	867	WALL.213	WA	34	20	7	3	130	69.9885	0.882205	2693.5
HOH	2019	868	P048	ED	33	20	4	5	143.333	71.4611	4.70857	2415.4
HOH	2019	869	F037	EF	32	20	1	5	186.667	75.6802	3.54259	2932.9
HOH	2019	870	F134	EF	31	20	3	3	135	74.0124	1.13609	2832.5
HOH	2019	871	P182	ED	30	20	0	5	142.333	67.9974	3.62098	2540.4
HOH	2019	872	STGA.168	RT	29	20	3	5	126.667	73.6411	0.742303	2875.2
HOH	2019	873	WALL.301	WA	28	20	1	5	176.667	32.1672	0.632675	2929.4
HOH	2019	874	STRE.214	SF	27	20	1	NA	175	75.9509	0.823181	2604.8
HOH	2019	875	WALL.309	WA	26	20	4	5	150	71.61	1.13657	3060.5
HOH	2019	876	P213	ED	25	20	5	5	159.333	67.8571	3.8475	2514.2
HOH	2019	877	VD03	ED	24	20	1	5	153.333	68.96	5.69966	2442.9
HOH	2019	878	F077	EF	23	20	0	3	150	72.6412	1.21081	3097.6
HOH	2019	879	STRE.213	SF	22	20	0	5	126.667	NA	NA	3049
HOH	2019	880	F101	EF	21	20	1	5	167.333	77.1347	3.10158	2900.5
HOH	2019	881	P335	ED	20	20	-2	3	156.667	63.8997	3.80012	2698.8
HOH	2019	882	WALL.209	WA	19	20	2	NA	148.333	67.3603	0.83931	3124.5
HOH	2019	883	WALL.178	WA	18	20	3	5	150	54.9923	1.52567	2730.7
HOH	2019	884	WALL.303	WA	17	20	6	NA	150.667	68.3624	1.47674	2704.2
HOH	2019	885	GELB.162	GB	16	20	8	5	170	64.3832	0.857263	2620.1
HOH	2019	886	WALL.143	WA	15	20	7	5	130	60.5016	0.760807	2825.4
HOH	2019	887	GELB.106	GB	14	20	4	5	178.333	71.0178	0.771727	3271.5
HOH	2019	888	WALL.258	WA	13	20	15	5	190	69.7587	0.518772	2894.8
HOH	2019	889	P239	ED	12	20	1	5	196.667	70.6684	3.93411	2770.6
HOH	2019	890	WALL.254	WA	11	20	5	5	145	74.2571	0.7922	3107.1
HOH	2019	891	SATU.257	SM	10	20	0	3	105	77.0913	1.35167	2787.7
HOH	2019	892	SATU.139	SM	9	20	5	7	207.333	69.1069	5.52636	2835.7
HOH	2019	893	F124	EF	8	20	2	3	153.667	77.1862	3.20966	2909.7
HOH	2019	894	GELB.130	GB	7	20	1	5	144	68.5494	0.177543	2982.8
HOH	2019	895	L047	EF	6	20	0	3	167.333	70.3112	3.20432	2674.9
HOH	2019	896	SATU.247	SM	5	20	NA	1	NA	100	NA	NA
HOH	2019	897	F055	EF	4	20	NA	NA	NA	NA	NA	2539.2
HOH	2019	898	GELB.122	GB	3	20	NA	NA	NA	NA	NA	2226.1
HOH	2019	899	F090	EF	2	20	3	5	162.667	72.6324	1.67732	2885.3
HOH	2019	900	SATU.126	SM	1	20	3	5	128.333	71.5335	1.62441	2994
HOH	2020	3001	WALL.219	WA	1	1	5	6	128	83.1329	1.23591	3768.5
HOH	2020	3002	P115	ED	2	1	3	5	148.667	NA	NA	NA
HOH	2020	3003	STGA.115	RT	3	1	5	6	119.667	80.3225	0.551548	NA
HOH	2020	3004	STRE.190	SF	4	1	4	5	99.3333	68.3299	0.134382	NA
HOH	2020	3005	P159	ED	5	1	8	3	97.3333	72.9405	0.244351	NA
HOH	2020	3006	SATU.186	SM	6	1	10	3	95.6667	82.2967	0.0576077	NA
HOH	2020	3007	F082	EF	7	1	4	4	147.333	73.7424	1.96032	NA
HOH	2020	3008	CAMP.107	CG	8	1	2	2	119.333	74.6479	0.199061	NA
HOH	2020	3009	F148	EF	9	1	0	4	145.667	NA	NA	NA
HOH	2020	3010	SATU.248	SM	10	1	5	3	88	77.0588	0.241451	NA
HOH	2020	3011	SATU.123	SM	11	1	9	2	76.3333	NA	NA	NA
HOH	2020	3012	P129	ED	12	1	4	2	86.3333	71.082	0.393321	NA
HOH	2020	3013	P120	ED	13	1	10	3	132.667	65.7604	0.366066	NA
HOH	2020	3014	GELB.135	GB	14	1	13	5	111	67.7985	0.224865	NA
HOH	2020	3015	D150	EF	15	1	3	4	131.667	76.4324	2.02673	NA
HOH	2020	3016	WALL.197	WA	16	1	2	4	79.6667	80.5769	0.0993782	NA
HOH	2020	3017	F259	EF	17	1	3	5	123	81.4024	1.79085	NA
HOH	2020	3018	STRE.214	SF	18	1	6	5	147	81.0844	0.244605	NA
HOH	2020	3019	WALL.222	WA	19	1	NA	2	84.6667	NA	NA	NA
HOH	2020	3020	GELB.104	GB	20	1	6	6	98.3333	75.7973	0.443414	NA
HOH	2020	3021	WALL.151	WA	21	1	6	3	97.6667	72.103	0.218712	NA
HOH	2020	3022	P033	ED	22	1	4	5	118.333	69.3548	2.05175	NA
HOH	2020	3023	STRE.205	SF	23	1	6	5	110.333	80.8602	0.499985	NA
HOH	2020	3024	WALL.143	WA	24	1	13	5	119.333	52.7701	0.0888296	NA
HOH	2020	3025	GELB.166	GB	25	1	10	5	125.333	77.6596	0.0517731	NA
HOH	2020	3026	SATU.141	SM	26	1	NA	2	98.3333	NA	NA	NA
HOH	2020	3027	WALL.270	WA	27	1	14	2	93	81.5789	0.0353509	NA
HOH	2020	3028	EP1	EF	28	1	5	4	107.333	66.3513	0.560668	NA
HOH	2020	3029	WALL.251	WA	29	1	14	4	138.667	NA	NA	NA
HOH	2020	3030	D171	EF	30	1	1	7	122	81.0108	2.69496	NA
HOH	2020	3031	WALL.301	WA	30	2	12	4	125	NA	NA	NA
HOH	2020	3032	F050	EF	29	2	1	4	138.333	76.8149	1.09589	NA
HOH	2020	3033	P317	ED	28	2	3	4	107	70.7057	2.09053	NA
HOH	2020	3034	P299	ED	27	2	6	3	103.333	NA	NA	NA
HOH	2020	3035	S064	ED	26	2	4	4	123	58.5083	1.0746	NA
HOH	2020	3036	P409	ED	25	2	5	3	125.667	67.1109	1.11851	NA
HOH	2020	3037	GELB.133	GB	24	2	5	6	143	NA	NA	NA
HOH	2020	3038	SATU.212	SM	23	2	7	3	113.333	72.907	0.238163	NA
HOH	2020	3039	WALL.178	WA	22	2	14	4	139.667	NA	NA	NA
HOH	2020	3040	F252	EF	21	2	6	4	116.667	68.4701	1.22562	NA
HOH	2020	3041	F062	EF	20	2	5	3	117	79.0394	1.58342	NA
HOH	2020	3042	P092	ED	19	2	5	3	123.333	67.3964	1.33333	NA
HOH	2020	3043	WALL.228	WA	18	2	10	3	98.6667	80.7087	0.0551509	NA
HOH	2020	3044	CAMP.004	CG	17	2	7	3	83	NA	NA	NA
HOH	2020	3045	WALL.296	WA	16	2	9	5	103.333	71.8487	0.13771	NA
HOH	2020	3046	P357	ED	15	2	4	5	129.667	73.293	1.84576	NA
HOH	2020	3047	WALL.108	WA	14	2	8	4	111.667	71.1465	0.177866	NA
HOH	2020	3048	SATU.135	SM	13	2	5	4	129	69.9713	1.96853	NA
HOH	2020	3049	SATU.013	SM	12	2	17	2	95	67.8049	0.116398	NA
HOH	2020	3050	F145	EF	11	2	3	4	132.667	70.7869	2.71822	NA
HOH	2020	3051	P063	ED	10	2	6	3	116.333	65.0252	2.11549	NA
HOH	2020	3052	STRE.197	SF	9	2	-1	3	110.667	77.8322	0.424185	NA
HOH	2020	3053	WALL.014	WA	8	2	4	2	100	NA	NA	NA
HOH	2020	3054	FV7	EF	7	2	3	3	92.6667	79.7564	0.478538	NA
HOH	2020	3055	WALL.154	WA	6	2	4	3	129.667	79.2368	0.923109	NA
HOH	2020	3056	L054	EF	5	2	4	3	124.667	75.1373	0.807726	NA
HOH	2020	3057	F182	EF	4	2	4	6	142.333	81.9358	1.76981	3924.9
HOH	2020	3058	WALL.303	WA	3	2	6	5	128.333	53.2278	0.236864	NA
HOH	2020	3059	WALL.001	WA	2	2	7	3	119	NA	NA	NA
HOH	2020	3060	F117	EF	1	2	5	5	138	68.6128	0.600362	NA
HOH	2020	3061	WALL.215	WA	1	3	5	3	114.333	69.7039	0.137084	NA
HOH	2020	3062	WALL.150	WA	2	3	9	3	114.333	67.5336	0.158704	NA
HOH	2020	3063	WALL.168	WA	3	3	5	4	97.3333	69.4458	0.481491	NA
HOH	2020	3064	GELB.121	GB	4	3	6	8	160.667	74.7255	2.72623	NA
HOH	2020	3065	CAMP.001	CG	5	3	3	4	145.333	79.242	0.624691	NA
HOH	2020	3066	STGA.172	RT	6	3	4	7	109.333	81.8124	0.889028	3756.3
HOH	2020	3067	P024	ED	7	3	7	4	153.333	64.6537	1.03015	NA
HOH	2020	3068	P344	ED	8	3	11	3	161.333	36.4978	0.437366	NA
HOH	2020	3069	F134	EF	9	3	4	5	124.667	81.7751	1.7459	NA
HOH	2020	3070	GELB.129	GB	10	3	7	6	154.667	62.0172	0.065118	NA
HOH	2020	3071	P140	ED	11	3	5	2	130.667	39.9032	0.458887	NA
HOH	2020	3072	WALL.318	WA	12	3	12	2	111.333	70.6122	0.114156	NA
HOH	2020	3073	STRE.176	SF	13	3	1	4	110.333	68.3755	0.617659	NA
HOH	2020	3074	F048	EF	14	3	3	3	126	79.6598	1.43786	NA
HOH	2020	3075	F169	EF	15	3	0	5	127.333	77.6411	2.32276	NA
HOH	2020	3076	F121	EF	16	3	5	5	144.333	75.1608	1.4744	NA
HOH	2020	3077	P184	ED	17	3	2	3	83.3333	66.504	0.9765	NA
HOH	2020	3078	STGA.151	RT	18	3	4	5	90	NA	NA	NA
HOH	2020	3079	WALL.149	WA	19	3	12	4	101.333	54.872	0.214916	NA
HOH	2020	3080	WALL.293	WA	20	3	16	2	97.3333	NA	NA	NA
HOH	2020	3081	P330	ED	21	3	5	3	150.333	57.736	1.08351	NA
HOH	2020	3082	F077	EF	22	3	3	3	112.667	78.9812	1.23474	NA
HOH	2020	3083	SATU.140	SM	23	3	8	2	86.3333	72.6027	0.0484018	NA
HOH	2020	3084	S050	ED	24	3	4	3	131.667	69.6615	2.27909	NA
HOH	2020	3085	WALL.134	WA	25	3	6	3	102	67.1694	0.221659	NA
HOH	2020	3086	SATU.243	SM	26	3	5	4	123.333	66.776	0.706713	NA
HOH	2020	3087	P213	ED	27	3	7	3	99.6667	65.7113	0.54869	NA
HOH	2020	3088	P351	ED	28	3	4	4	145.333	62.7302	2.15374	NA
HOH	2020	3089	GELB.122	GB	29	3	10	5	112.667	73.6173	0.24171	NA
HOH	2020	3090	P422	ED	30	3	6	4	122	67.669	0.921426	NA
HOH	2020	3091	P284	ED	30	4	5	4	165.333	58.2795	3.15487	NA
HOH	2020	3092	WALL.207	WA	29	4	5	4	119.667	76.0539	0.597023	NA
HOH	2020	3093	SATU.163	SM	28	4	9	3	134.333	59.7613	0.58566	NA
HOH	2020	3094	GELB.A219	GB	27	4	13	4	125.333	58.7179	0.210406	NA
HOH	2020	3095	F105	EF	26	4	4	6	135.333	67.3971	2.33868	NA
HOH	2020	3096	STGA.182	RT	25	4	6	7	89	81.4052	0.641745	NA
HOH	2020	3097	SATU.256	SM	24	4	3	4	95.6667	72.9241	1.53505	NA
HOH	2020	3098	GELB.110	GB	23	4	2	5	97	81.433	0.237513	NA
HOH	2020	3099	WALL.185	WA	22	4	6	3	116.667	74.9107	0.161058	NA
HOH	2020	3100	STRE.305	SF	21	4	4	7	123	76.7474	0.48223	NA
HOH	2020	3101	GELB.138	GB	20	4	5	3	121.333	58.4081	0.105135	NA
HOH	2020	3102	P289	ED	19	4	2	4	140	45.698	0.623778	NA
HOH	2020	3103	D107	EF	18	4	6	5	100.667	65.5713	0.450256	NA
HOH	2020	3104	CAMP.306	CG	17	4	14	2	87	66.3921	0.095162	NA
HOH	2020	3105	GELB.162	GB	16	4	13	6	119.333	50.4218	0.153787	NA
HOH	2020	3106	L060	EF	15	4	10	3	136.667	71.9915	0.41995	NA
HOH	2020	3107	F066	EF	14	4	3	4	123.333	81.221	1.28465	NA
HOH	2020	3108	P105	ED	13	4	3	3	126.667	75.6938	1.78385	NA
HOH	2020	3109	SATU.218	SM	12	4	NA	2	63.6667	NA	NA	NA
HOH	2020	3110	P135	ED	11	4	3	6	133	68.288	1.47616	NA
HOH	2020	3111	F201	EF	10	4	1	5	160.667	68.4567	1.92477	NA
HOH	2020	3112	D105	EF	9	4	5	6	123.333	71.4729	0.521752	NA
HOH	2020	3113	WALL.216	WA	8	4	NA	2	127.667	NA	NA	NA
HOH	2020	3114	D146	EF	7	4	36	4	130.333	70.7865	0.651236	NA
HOH	2020	3115	P102	ED	6	4	-1	5	140	71.7716	0.772741	NA
HOH	2020	3116	S018	ED	5	4	5	4	153.667	54.9146	0.430164	NA
HOH	2020	3117	P362	ED	4	4	3	4	122.667	81.1014	2.07079	NA
HOH	2020	3118	F110	EF	3	4	1	5	122	78.9455	1.9118	NA
HOH	2020	3119	P304	ED	2	4	2	4	123.667	79.7772	1.81626	3179.3
HOH	2020	3120	WALL.269	WA	1	4	2	5	129.667	77.1548	1.37593	NA
HOH	2020	3121	SATU.264	SM	1	5	7	3	124.667	75.7846	0.323347	NA
HOH	2020	3122	SATU.263	SM	2	5	4	3	86.6667	76.9678	0.88513	NA
HOH	2020	3123	P106	ED	3	5	2	3	121.667	70.8223	2.96391	NA
HOH	2020	3124	CAMP.130	CG	4	5	3	4	95.6667	82.1893	0.704088	3495.6
HOH	2020	3125	STRE.156	SF	5	5	1	5	107.333	62.9308	0.35451	NA
HOH	2020	3126	S066	ED	6	5	4	3	137.667	64.8697	1.11143	NA
HOH	2020	3127	F103	EF	7	5	3	5	142	80.5141	1.83706	NA
HOH	2020	3128	STGA.303	RT	8	5	5	7	113.333	80.9418	0.693401	NA
HOH	2020	3129	SATU.149	SM	9	5	12	2	96.6667	NA	NA	NA
HOH	2020	3130	P481	ED	10	5	6	4	147	64.3632	0.967594	NA
HOH	2020	3131	F056	EF	11	5	2	5	98.6667	77.9225	1.82988	NA
HOH	2020	3132	FV2	EF	12	5	2	5	88	76.0949	0.971479	NA
HOH	2020	3133	WALL.128	WA	13	5	10	3	114	72.0339	0.235311	NA
HOH	2020	3134	P271	ED	14	5	4	4	149.333	65.4064	2.18348	NA
HOH	2020	3135	P072	ED	15	5	7	4	127	67.6502	0.538947	NA
HOH	2020	3136	SATU.268	SM	16	5	9	2	98.3333	67.0195	0.227866	NA
HOH	2020	3137	P360	ED	17	5	7	4	114.333	64.1925	0.897625	NA
HOH	2020	3138	P127	ED	18	5	5	4	115.667	66.9804	0.608405	NA
HOH	2020	3139	SATU.235	SM	19	5	16	2	105.333	60.221	0.0782873	NA
HOH	2020	3140	L046	EF	20	5	3	4	122.667	76.0547	1.63898	NA
HOH	2020	3141	WALL.271	WA	21	5	3	4	115.333	75.8059	0.392927	NA
HOH	2020	3142	STRE.219	SF	22	5	9	5	117	NA	NA	NA
HOH	2020	3143	P335	ED	23	5	6	3	125	66.1494	1.09918	NA
HOH	2020	3144	GELB.157	GB	24	5	6	5	141	66.5878	1.26073	NA
HOH	2020	3145	STGA.150	RT	25	5	4	6	103.667	78.1421	0.0755373	NA
HOH	2020	3146	GELB.A216	GB	26	5	5	4	122.333	73.8	0.27306	NA
HOH	2020	3147	F012	EF	27	5	0	4	133.333	NA	NA	NA
HOH	2020	3148	P353	ED	28	5	0	5	106.333	77.4104	3.63184	NA
HOH	2020	3149	D102	EF	29	5	4	4	80	78.885	0.670523	NA
HOH	2020	3150	WALL.165	WA	30	5	8	3	121.333	61.3164	0.330087	NA
HOH	2020	3151	STGA.104	RT	30	6	1	5	87	76.7136	0.163656	NA
HOH	2020	3152	GELB.A102	GB	29	6	2	7	122.333	70.076	0.199717	NA
HOH	2020	3153	SATU.004	SM	28	6	4	3	103.333	76.6842	1.36626	NA
HOH	2020	3154	GELB.A121	GB	27	6	9	4	164.333	NA	NA	NA
HOH	2020	3155	SATU.182	SM	26	6	NA	2	103.667	NA	NA	NA
HOH	2020	3156	WALL.006	WA	25	6	4	4	111.333	75.09	0.454295	NA
HOH	2020	3157	L043	EF	24	6	1	4	121.333	78.7848	2.09305	NA
HOH	2020	3158	P182	ED	23	6	5	3	116.667	70.3512	1.61339	NA
HOH	2020	3159	WALL.189	WA	22	6	9	2	120.667	61.4796	0.30125	NA
HOH	2020	3160	SATU.228	SM	21	6	NA	2	93.3333	NA	NA	NA
HOH	2020	3161	WALL.195	WA	20	6	12	7	128.333	NA	NA	NA
HOH	2020	3162	SATU.269	SM	19	6	18	2	78.3333	NA	NA	NA
HOH	2020	3163	P034	ED	18	6	NA	NA	NA	NA	NA	NA
HOH	2020	3164	STRE.303	SF	17	6	NA	NA	NA	NA	NA	NA
HOH	2020	3165	L012	EF	16	6	8	5	138	64.5694	1.39039	NA
HOH	2020	3166	F094	EF	15	6	2	5	122	79.4534	1.62085	NA
HOH	2020	3167	SATU.126	SM	14	6	5	4	99	73.0087	0.586503	NA
HOH	2020	3168	F043	EF	13	6	2	5	138.667	74.6193	2.39777	NA
HOH	2020	3169	STRE.212	SF	12	6	NA	3	87.6667	NA	NA	NA
HOH	2020	3170	L016	EF	11	6	5	4	111.333	68.8511	0.967359	NA
HOH	2020	3171	SATU.128	SM	10	6	13	2	126.333	NA	NA	NA
HOH	2020	3172	STGA.161	RT	9	6	5	7	112	NA	NA	NA
HOH	2020	3173	F195	EF	8	6	2	7	137.333	81.9168	2.20902	NA
HOH	2020	3174	SATU.282	SM	7	6	4	2	94.3333	68.4116	0.336357	NA
HOH	2020	3175	P001	ED	6	6	9	3	149.667	64.1678	0.953961	NA
HOH	2020	3176	P223	ED	5	6	4	4	128	64.3738	1.93658	3276.5
HOH	2020	3177	P074	ED	4	6	4	3	145.333	67.5352	1.8212	NA
HOH	2020	3178	L056	EF	3	6	0	5	152	79.9468	3.18188	NA
HOH	2020	3179	P080	ED	2	6	4	4	154.667	71.7819	2.51476	NA
HOH	2020	3180	F104	EF	1	6	2	4	140.667	69.1745	1.84696	NA
HOH	2020	3181	F055	EF	1	7	0	6	143.667	73.6427	3.28937	3467.8
HOH	2020	3182	SATU.137	SM	2	7	17	3	113.667	73.0104	0.0888293	NA
HOH	2020	3183	F101	EF	3	7	1	5	129	83.0633	2.45314	3408
HOH	2020	3184	GELB.A220	GB	4	7	3	6	145	77.4577	0.512512	NA
HOH	2020	3185	P066	ED	5	7	3	3	149	74.4927	2.09324	NA
HOH	2020	3186	WALL.260	WA	6	7	17	3	115.667	51.2695	0.12561	NA
HOH	2020	3187	WALL.113	WA	7	7	5	2	100.333	75.8399	0.36024	NA
HOH	2020	3188	P194	ED	8	7	3	4	112.333	75.7438	2.75834	NA
HOH	2020	3189	SATU.008	SM	9	7	8	3	83.6667	74.7049	0.0971164	NA
HOH	2020	3190	S067	ED	10	7	4	5	129	72.2368	2.03949	NA
HOH	2020	3191	D167	EF	11	7	2	5	151.333	76.0631	2.17033	NA
HOH	2020	3192	P239	ED	12	7	4	5	162.333	71.9046	2.11759	NA
HOH	2020	3193	P136	ED	13	7	5	3	132.333	68.1126	3.54639	NA
HOH	2020	3194	GELB.149	GB	14	7	6	4	131.667	74.5989	0.113142	NA
HOH	2020	3195	F262	EF	15	7	2	5	123	67.5041	2.40765	NA
HOH	2020	3196	S036	ED	16	7	6	2	119	76.258	1.51753	NA
HOH	2020	3197	D152	EF	17	7	2	3	109.667	79.1321	0.924527	NA
HOH	2020	3198	GELB.A217	GB	18	7	6	5	137.333	75.2381	0.194365	NA
HOH	2020	3199	F087	EF	19	7	4	6	135	81.7841	1.25539	NA
HOH	2020	3200	F124	EF	20	7	0	5	114.333	81.7071	1.96914	NA
HOH	2020	3201	STGA.101	RT	21	7	6	6	100.333	80.8135	0.507778	NA
HOH	2020	3202	F159	EF	22	7	3	6	124	74.0516	2.12405	NA
HOH	2020	3203	P110	ED	23	7	5	2	106	71.8091	0.343487	NA
HOH	2020	3204	P396	ED	24	7	3	3	111.667	63.5903	1.11177	NA
HOH	2020	3205	SATU.183	SM	25	7	21	2	123.667	56.9231	0.0711538	NA
HOH	2020	3206	STRE.174	SF	26	7	3	5	98	76.8946	0.16276	NA
HOH	2020	3207	P040	ED	27	7	2	3	122	69.5993	2.02534	NA
HOH	2020	3208	SATU.237	SM	28	7	10	4	114.333	69.5458	0.180819	NA
HOH	2020	3209	WALL.285	WA	29	7	7	5	97.6667	76.0205	1.53815	NA
HOH	2020	3210	L035	EF	30	7	4	4	123	73.9873	2.68574	NA
HOH	2020	3211	P096	ED	30	8	2	3	113	68.7538	1.99615	NA
HOH	2020	3212	L037	EF	29	8	3	5	144.333	74.1397	1.91651	NA
HOH	2020	3213	SATU.224	SM	28	8	9	2	114.333	73.3894	0.118646	NA
HOH	2020	3214	P130	ED	27	8	3	4	135.333	68.5961	2.38257	NA
HOH	2020	3215	CAMP.141	CG	26	8	1	4	136	NA	NA	NA
HOH	2020	3216	WALL.175	WA	25	8	6	6	135.333	66.3786	1.00232	NA
HOH	2020	3217	F137	EF	24	8	2	5	127.667	70.2221	1.26985	NA
HOH	2020	3218	WALL.225	WA	23	8	3	3	106.333	41.7187	0.263523	NA
HOH	2020	3219	SATU.152	SM	22	8	13	2	101.667	55.2501	0.22008	NA
HOH	2020	3220	STRE.215	SF	21	8	6	5	130	79.7714	0.255269	NA
HOH	2020	3221	P060	ED	20	8	13	3	114.333	NA	NA	NA
HOH	2020	3222	F160	EF	19	8	3	5	122	82.8343	1.04647	NA
HOH	2020	3223	F173	EF	18	8	5	5	136	77.8045	1.82841	NA
HOH	2020	3224	SATU.014	SM	17	8	2	2	91	67.7804	0.457517	NA
HOH	2020	3225	P081	ED	16	8	6	4	127	69.4272	0.617902	NA
HOH	2020	3226	CAMP.303	CG	15	8	3	3	92.3333	69.883	0.184025	NA
HOH	2020	3227	P006	ED	14	8	4	4	149.333	79.3345	2.33772	NA
HOH	2020	3228	F054	EF	13	8	1	6	151.333	81.799	2.19221	NA
HOH	2020	3229	STRE.163	SF	12	8	5	4	113	66.9935	0.626389	NA
HOH	2020	3230	GELB.A203	GB	11	8	2	5	133.667	75.821	0.348777	NA
HOH	2020	3231	P312	ED	10	8	2	3	124.667	60.2512	2.82378	NA
HOH	2020	3232	GELB.A119	GB	9	8	8	4	117.333	75.6714	0.344305	NA
HOH	2020	3233	WALL.277	WA	8	8	6	4	92.3333	69.0577	0.684822	NA
HOH	2020	3234	P342	ED	7	8	7	2	131.333	57.6247	1.19475	NA
HOH	2020	3235	P150	ED	6	8	5	2	120	NA	NA	NA
HOH	2020	3236	SATU.176	SM	5	8	4	4	97.6667	69.2741	1.16842	NA
HOH	2020	3237	F217	EF	4	8	2	5	126.667	81.051	1.26169	NA
HOH	2020	3238	STGA.168	RT	3	8	3	5	88	82.5485	0.126574	NA
HOH	2020	3239	F136	EF	2	8	2	5	149	76.9815	1.58197	NA
HOH	2020	3240	F260	EF	1	8	2	4	134.667	79.0399	1.81528	2870.5
HOH	2020	3241	F040	EF	1	9	0	6	140.333	82.8643	2.02189	NA
HOH	2020	3242	F162	EF	2	9	1	4	133.667	66.8725	2.70834	NA
HOH	2020	3243	F138	EF	3	9	2	6	105.667	73.5333	2.37267	3691
HOH	2020	3244	P415	ED	4	9	9	4	117.333	58.7264	0.187925	NA
HOH	2020	3245	CAMP.301	CG	5	9	2	4	128.667	68.7124	0.121392	NA
HOH	2020	3246	WALL.218	WA	6	9	6	4	116.667	1275.84	0.999407	NA
HOH	2020	3247	S072	ED	7	9	1	4	147.333	76.4706	2.17559	NA
HOH	2020	3248	F047	EF	8	9	3	5	118	76.2741	2.17508	NA
HOH	2020	3249	F142	EF	9	9	2	5	136	78.5807	2.15311	NA
HOH	2020	3250	SATU.106	SM	10	9	4	3	101.667	70.935	0.315661	NA
HOH	2020	3251	STRE.208	SF	11	9	5	3	112.333	72.0971	0.106944	NA
HOH	2020	3252	P206	ED	12	9	4	4	117.667	77.8452	2.1122	NA
HOH	2020	3253	GELB.A127	GB	13	9	17	6	160	NA	NA	NA
HOH	2020	3254	STRE.165	SF	14	9	3	6	124.667	75.7905	0.284214	NA
HOH	2020	3255	S028	ED	15	9	4	4	136.333	66.1781	1.23312	NA
HOH	2020	3256	SATU.258	SM	16	9	7	2	98.6667	67.6806	0.111673	NA
HOH	2020	3257	GELB.148	GB	17	9	5	6	141.667	69.415	0.316995	NA
HOH	2020	3258	F088	EF	18	9	4	7	169.667	76.9242	2.40132	NA
HOH	2020	3259	CAMP.117	CG	19	9	3	5	118	72.089	0.508227	NA
HOH	2020	3260	F005	EF	20	9	2	7	157.333	74.0821	3.41395	NA
HOH	2020	3261	SATU.129	SM	21	9	3	3	134.667	61.6752	1.45451	NA
HOH	2020	3262	P167	ED	22	9	6	3	161.333	47.8873	1.21474	NA
HOH	2020	3263	CAMP.137	CG	23	9	7	3	119	57.3854	0.0803396	NA
HOH	2020	3264	P048	ED	24	9	6	3	119	70.7583	1.21233	NA
HOH	2020	3265	WALL.191	WA	25	9	10	3	112.667	57.7849	0.225361	NA
HOH	2020	3266	P383	ED	26	9	2	4	129.667	63.5437	2.11177	NA
HOH	2020	3267	F266	EF	27	9	12	5	120.667	NA	NA	NA
HOH	2020	3268	GELB.158	GB	28	9	8	6	156	78.1818	0.110758	NA
HOH	2020	3269	F154	EF	29	9	2	5	123.667	80.3937	2.56188	NA
HOH	2020	3270	L045	EF	30	9	5	5	127.667	71.0938	0.940807	NA
HOH	2020	3271	WALL.179	WA	30	10	7	6	123.333	NA	NA	NA
HOH	2020	3272	F037	EF	29	10	3	5	143.667	80.1493	2.53806	NA
HOH	2020	3273	F106	EF	28	10	3	4	134.333	68.0703	2.43692	NA
HOH	2020	3274	L059	EF	27	10	1	4	133.667	77.9034	2.30464	NA
HOH	2020	3275	WALL.172	WA	26	10	9	5	123.667	NA	NA	NA
HOH	2020	3276	GELB.155	GB	25	10	NA	3	98	NA	NA	NA
HOH	2020	3277	STGA.158	RT	24	10	7	7	94.3333	77.3281	0.3222	NA
HOH	2020	3278	L051	EF	23	10	0	6	144	81.4459	2.96599	NA
HOH	2020	3279	F099	EF	22	10	3	7	151.333	70.0485	3.71957	NA
HOH	2020	3280	P245	ED	21	10	3	4	130	72.2721	2.6825	NA
HOH	2020	3281	WALL.012	WA	20	10	6	3	127.667	69.9901	0.383779	NA
HOH	2020	3282	P165	ED	19	10	8	5	138	74.2132	0.717394	NA
HOH	2020	3283	SATU.127	SM	18	10	0	4	120	69.515	2.01594	NA
HOH	2020	3284	SATU.281	SM	17	10	4	5	107.667	71.6736	0.794382	NA
HOH	2020	3285	STRE.211	SF	16	10	11	3	98.3333	NA	NA	NA
HOH	2020	3286	P219	ED	15	10	5	6	152	65.3749	0.746364	NA
HOH	2020	3287	WALL.316	WA	14	10	10	6	153.333	67.6402	0.616653	NA
HOH	2020	3288	GELB.143	GB	13	10	2	6	132	76.7926	0.254695	NA
HOH	2020	3289	P083	ED	12	10	8	4	128.333	64.2314	1.25144	NA
HOH	2020	3290	SATU.290	SM	11	10	5	3	115.333	72.9233	0.190816	NA
HOH	2020	3291	F240	EF	10	10	2	5	121.333	70.5429	0.897071	NA
HOH	2020	3292	F052	EF	9	10	1	6	139.667	77.8447	2.28993	NA
HOH	2020	3293	F147	EF	8	10	2	5	134.667	77.7082	1.55028	NA
HOH	2020	3294	SATU.162	SM	7	10	1	3	152	73.3259	0.966679	NA
HOH	2020	3295	S046	ED	6	10	3	5	121	66.9587	1.20637	NA
HOH	2020	3296	SATU.169	SM	5	10	3	4	105.667	68.7871	1.29205	NA
HOH	2020	3297	STRE.201	SF	4	10	0	4	108.333	79.8563	0.677447	NA
HOH	2020	3298	GELB.A125	GB	3	10	5	5	94.3333	75.402	0.235003	NA
HOH	2020	3299	P188	ED	2	10	3	4	112.667	68.5208	0.479646	NA
HOH	2020	3300	STRE.213	SF	1	10	25	6	106	78.2971	0.230976	NA
HOH	2020	3301	F179	EF	1	11	4	5	154.333	80.2035	1.22711	3309.6
HOH	2020	3302	STRE.167	SF	2	11	7	5	118.333	76.7866	0.282831	NA
HOH	2020	3303	VD03	ED	3	11	5	4	114.667	64.631	0.528897	NA
HOH	2020	3304	P133	ED	4	11	4	3	128.333	72.9162	1.0585	3268.9
HOH	2020	3305	F186	EF	5	11	6	5	115.667	80.2445	0.569736	NA
HOH	2020	3306	WALL.317	WA	6	11	5	4	109.667	74.9203	0.616844	NA
HOH	2020	3307	STRE.172	SF	7	11	4	5	104.333	77.9303	0.744234	NA
HOH	2020	3308	P484	ED	8	11	2	5	136.667	79.1253	2.97379	NA
HOH	2020	3309	D142	EF	9	11	4	6	149	75.2	0.44368	NA
HOH	2020	3310	SATU.278	SM	10	11	7	4	83	73.5912	0.247757	NA
HOH	2020	3311	WALL.104	WA	11	11	11	1	131.333	62.9108	0.0712989	NA
HOH	2020	3312	P290	ED	12	11	2	5	135	63.4957	1.91334	NA
HOH	2020	3313	P272	ED	13	11	2	2	168.667	52.6778	0.912204	NA
HOH	2020	3314	WALL.184	WA	14	11	9	5	113	65.3159	0.179619	NA
HOH	2020	3315	WALL.169	WA	15	11	NA	3	112.667	52.7675	0.0395756	NA
HOH	2020	3316	SATU.277	SM	16	11	10	3	85	56.2731	0.073155	NA
HOH	2020	3317	STRE.158	SF	17	11	1	4	110.333	80.1849	0.351477	NA
HOH	2020	3318	STRE.146	SF	18	11	8	7	131.667	71.1861	1.01796	NA
HOH	2020	3319	GELB.A106	GB	19	11	2	6	128.333	76.8742	1.84626	NA
HOH	2020	3320	L023	EF	20	11	8	4	133	65.2908	0.694259	NA
HOH	2020	3321	SATU.240	SM	21	11	12	3	100.667	64.4611	0.338421	NA
HOH	2020	3322	SATU.139	SM	22	11	5	6	123.667	78.7305	1.27937	NA
HOH	2020	3323	F030	EF	23	11	4	5	117.667	72.6575	3.05282	NA
HOH	2020	3324	F023	EF	24	11	5	6	144	67.6959	1.55024	NA
HOH	2020	3325	WALL.122	WA	25	11	1	3	97.3333	80.1181	NA	NA
HOH	2020	3326	F151	EF	26	11	3	4	114.667	72.6086	1.43523	NA
HOH	2020	3327	P075	ED	27	11	4	4	113.667	71.1168	1.84667	NA
HOH	2020	3328	GELB.130	GB	28	11	4	7	95.3333	82.6725	0.308644	NA
HOH	2020	3329	STGA.108	RT	29	11	3	6	84.6667	NA	NA	NA
HOH	2020	3330	P122	ED	30	11	37	4	137.667	67.1928	0.762638	NA
HOH	2020	3331	WALL.010	WA	30	12	13	4	101	NA	NA	NA
HOH	2020	3332	L050	EF	29	12	3	4	131.333	66.7422	2.31262	NA
HOH	2020	3333	WALL.209	WA	28	12	1	5	128.667	70.66	1.26835	NA
HOH	2020	3334	STGA.173	RT	27	12	5	4	92.3333	76.1783	0.269163	NA
HOH	2020	3335	SATU.161	SM	26	12	13	2	81.6667	62.7907	0.0617442	NA
HOH	2020	3336	WALL.213	WA	25	12	10	2	77.3333	NA	NA	NA
HOH	2020	3337	SATU.270	SM	24	12	5	5	132.667	63.9945	1.25429	NA
HOH	2020	3338	STGA.136	RT	23	12	7	5	102	76.5542	0.464429	NA
HOH	2020	3339	L041	EF	22	12	1	5	156.333	78.4152	2.35246	NA
HOH	2020	3340	F045	EF	21	12	2	5	135	79.2125	2.86353	NA
HOH	2020	3341	P087	ED	20	12	7	3	126.333	68.2595	2.05802	NA
HOH	2020	3342	P352	ED	19	12	2	3	108	66.7158	2.72423	NA
HOH	2020	3343	CAMP.104	CG	18	12	5	4	105	72.3409	0.875325	NA
HOH	2020	3344	P065	ED	17	12	6	4	136	67.2871	1.33901	NA
HOH	2020	3345	STRE.216	SF	16	12	8	5	120.333	73.4774	0.337996	NA
HOH	2020	3346	STRE.307	SF	15	12	6	6	123	77.8581	0.807129	NA
HOH	2020	3347	STRE.130	SF	14	12	7	4	110.667	74.2322	0.872228	NA
HOH	2020	3348	GELB.A122	GB	13	12	6	5	111	58.3942	0.0603406	NA
HOH	2020	3349	F109	EF	12	12	1	4	131.333	72.5643	3.26902	NA
HOH	2020	3350	STRE.127	SF	11	12	7	5	102.333	72.2886	0.279516	NA
HOH	2020	3351	WALL.297	WA	10	12	3	3	93	70.4671	0.319451	NA
HOH	2020	3352	P104	ED	9	12	2	2	110	74.3711	0.602406	NA
HOH	2020	3353	WALL.105	WA	8	12	6	4	90	80.166	0.330017	NA
HOH	2020	3354	F034	EF	7	12	8	5	129.333	75.8772	1.55422	NA
HOH	2020	3355	SATU.245	SM	6	12	5	3	84.6667	76.3412	0.498763	NA
HOH	2020	3356	SATU.130	SM	5	12	12	4	120.667	NA	NA	NA
HOH	2020	3357	GELB.106	GB	4	12	11	6	129.667	NA	NA	NA
HOH	2020	3358	F090	EF	3	12	3	4	134.333	78.9505	1.26716	3442.9
HOH	2020	3359	GELB.109	GB	2	12	10	5	89.3333	77.1712	0.0733127	NA
HOH	2020	3360	WALL.174	WA	1	12	3	5	93.3333	78.8831	0.0999186	NA
HOH	2020	3361	STRE.138	SF	1	13	11	5	115	78.4219	0.107177	NA
HOH	2020	3362	F096	EF	2	13	2	5	132.667	72.2422	2.00231	NA
HOH	2020	3363	SATU.196	SM	3	13	3	2	86.3333	73.7892	0.239815	NA
HOH	2020	3364	P410	ED	4	13	5	2	121	44.9864	0.124463	NA
HOH	2020	3365	SATU.167	SM	5	13	NA	2	79	NA	NA	NA
HOH	2020	3366	F242	EF	6	13	3	4	150.667	63.8026	0.814547	NA
HOH	2020	3367	P261	ED	7	13	7	4	127.333	62.1317	0.348973	NA
HOH	2020	3368	F084	EF	8	13	2	5	134.333	77.6022	1.09031	NA
HOH	2020	3369	GELB.164	GB	9	13	7	6	105.667	76.6013	0.316619	NA
HOH	2020	3370	P209	ED	10	13	2	4	98.3333	65.3311	1.12914	NA
HOH	2020	3371	P053	ED	11	13	3	3	124.333	70.358	1.18084	NA
HOH	2020	3372	F198	EF	12	13	1	3	124	79.3785	1.37722	NA
HOH	2020	3373	P385	ED	13	13	9	5	145.333	71.7274	0.219964	NA
HOH	2020	3374	L047	EF	14	13	1	5	149.667	80.1809	2.38271	NA
HOH	2020	3375	P275	ED	15	13	5	5	158.333	61.2637	0.970008	NA
HOH	2020	3376	SATU.165	SM	16	13	NA	2	57.3333	NA	NA	NA
HOH	2020	3377	GELB.A213	GB	17	13	7	5	122.333	71.1018	0.337734	NA
HOH	2020	3378	S058	ED	18	13	2	3	115.667	70.5882	2.77176	NA
HOH	2020	3379	STRE.306	SF	19	13	7	3	91.6667	63.2017	0.0684685	NA
HOH	2020	3380	WALL.257	WA	20	13	6	4	112.333	73.8659	0.14527	NA
HOH	2020	3381	P250	ED	21	13	4	3	125.667	62.031	1.05453	NA
HOH	2020	3382	STRE.109	SF	22	13	6	6	124	71.7098	0.568898	NA
HOH	2020	3383	F161	EF	23	13	2	5	131.333	65.3394	1.91989	NA
HOH	2020	3384	P212	ED	24	13	37	5	141.333	69.9884	0.869023	NA
HOH	2020	3385	P354	ED	25	13	3	4	151	72.3736	1.01806	NA
HOH	2020	3386	SATU.257	SM	26	13	3	2	83.6667	77.1574	0.101591	NA
HOH	2020	3387	F060	EF	27	13	4	6	125.333	81.4005	2.24665	NA
HOH	2020	3388	SATU.134	SM	28	13	2	2	123	81.5388	1.20949	NA
HOH	2020	3389	L007	EF	29	13	35	4	126.333	64.1043	1.05665	NA
HOH	2020	3390	WALL.254	WA	30	13	5	6	114	68.4806	0.243106	NA
HOH	2020	3391	P108	ED	30	14	5	6	124.333	72.5036	1.37273	NA
HOH	2020	3392	P085	ED	29	14	3	4	125.333	67.5892	1.23012	NA
HOH	2020	3393	STRE.155	SF	28	14	19	4	108.333	NA	NA	NA
HOH	2020	3394	F207	EF	27	14	4	5	111.667	79.5003	1.14348	NA
HOH	2020	3395	WALL.309	WA	26	14	17	4	100.333	NA	NA	NA
HOH	2020	3396	P420	ED	25	14	5	4	123.333	70.5976	1.09779	NA
HOH	2020	3397	F108	EF	24	14	0	4	90.6667	78.0421	1.1173	NA
HOH	2020	3398	F139.STRE	EF	23	14	5	4	96.6667	69.4539	0.159744	NA
HOH	2020	3399	P042	ED	22	14	4	4	127.667	70.9593	1.17201	NA
HOH	2020	3400	P154	ED	21	14	2	5	112.333	67.7573	1.65215	NA
HOH	2020	3401	WALL.175	WA	20	14	8	6	140.667	66.8542	0.948216	NA
HOH	2020	3402	SATU.218	SM	19	14	NA	2	51	NA	NA	NA
HOH	2020	3403	F195	EF	18	14	1	6	135.667	80.3116	1.44561	NA
HOH	2020	3404	WALL.189	WA	17	14	13	3	127.667	67.4926	0.247473	NA
HOH	2020	3405	F094	EF	16	14	2	5	119.667	79.4629	1.52039	NA
HOH	2020	3406	L054	EF	15	14	9	3	125.667	64.0531	0.198565	NA
HOH	2020	3407	STRE.305	SF	14	14	5	7	127.667	78.9062	0.382695	NA
HOH	2020	3408	F043	EF	13	14	1	5	127.667	71.6253	1.71065	NA
HOH	2020	3409	P383	ED	12	14	7	4	135.333	65.1579	1.57465	NA
HOH	2020	3410	F088	EF	11	14	3	5	150	75.8448	1.54723	NA
HOH	2020	3411	F056	EF	10	14	4	5	120.333	77.1853	2.08915	NA
HOH	2020	3412	D171	EF	9	14	1	6	120.333	81.4652	1.92801	NA
HOH	2020	3413	F090	EF	8	14	3	4	124.667	78.784	1.36559	NA
HOH	2020	3414	P065	ED	7	14	3	3	129	NA	NA	NA
HOH	2020	3415	GELB.A119	GB	6	14	7	4	107.333	68.8899	0.535045	NA
HOH	2020	3416	STGA.182	RT	5	14	4	5	86.3333	81.6812	0.262741	NA
HOH	2020	3417	P317	ED	4	14	4	4	110	67.5665	1.35358	3292.2
HOH	2020	3418	EP1	EF	3	14	8	4	109	63.0183	0.24052	NA
HOH	2020	3419	SATU.290	SM	2	14	12	3	101.333	NA	NA	NA
HOH	2020	3420	P105	ED	1	14	5	3	117.333	79.9322	0.261112	NA
HOH	2020	3421	WALL.213	WA	1	15	12	2	85	78.2927	0.0809024	NA
HOH	2020	3422	S050	ED	2	15	5	3	130.333	71.0702	1.8573	NA
HOH	2020	3423	WALL.128	WA	3	15	16	3	102.333	63.5762	0.0540397	NA
HOH	2020	3424	P066	ED	4	15	2	4	128	73.065	1.66588	NA
HOH	2020	3425	P122	ED	5	15	5	4	135	74.2555	0.525976	NA
HOH	2020	3426	STRE.109	SF	6	15	5	6	136	66.3224	0.486364	NA
HOH	2020	3427	WALL.122	WA	7	15	6	3	106.333	74.2888	0.258773	NA
HOH	2020	3428	P385	ED	8	15	8	5	141	75.8665	0.31611	NA
HOH	2020	3429	L059	EF	9	15	4	4	147.667	78.9353	1.29849	NA
HOH	2020	3430	L012	EF	10	15	5	4	146.667	65.4357	1.34579	NA
HOH	2020	3431	P087	ED	11	15	7	3	129.667	69.1375	1.15344	NA
HOH	2020	3432	F154	EF	12	15	2	5	127.333	79.524	2.61369	NA
HOH	2020	3433	D107	EF	13	15	-1	6	123.667	64.4894	1.13071	NA
HOH	2020	3434	F110	EF	14	15	2	5	116	81.5306	1.44717	NA
HOH	2020	3435	P275	ED	15	15	9	5	148.333	NA	NA	NA
HOH	2020	3436	WALL.216	WA	16	15	NA	3	127.333	NA	NA	NA
HOH	2020	3437	P150	ED	17	15	3	2	121	67.1631	1.19326	NA
HOH	2020	3438	STGA.150	RT	18	15	3	5	94.3333	75.7909	0.113686	NA
HOH	2020	3439	P092	ED	19	15	5	3	132.667	68.3172	1.17961	NA
HOH	2020	3440	SATU.282	SM	20	15	2	2	100.667	62.4272	0.255952	NA
HOH	2020	3441	F062	EF	21	15	4	5	123.333	79.1252	1.78823	NA
HOH	2020	3442	SATU.277	SM	22	15	14	3	94.3333	63.6505	0.0848674	NA
HOH	2020	3443	L051	EF	23	15	1	5	136.333	79.7643	2.50992	NA
HOH	2020	3444	WALL.270	WA	24	15	13	2	95.3333	71.7791	0.0394785	NA
HOH	2020	3445	GELB.A216	GB	25	15	6	4	130.667	76.1799	0.427877	NA
HOH	2020	3446	GELB.A122	GB	26	15	5	6	105.333	79.1967	0.149154	NA
HOH	2020	3447	P360	ED	27	15	5	5	138.333	73.8726	1.80372	NA
HOH	2020	3448	F084	EF	28	15	1	7	132.667	79.8545	1.72885	NA
HOH	2020	3449	GELB.A203	GB	29	15	3	6	136	70.8852	0.388687	NA
HOH	2020	3450	WALL.269	WA	30	15	7	6	127.333	76.399	1.19819	NA
HOH	2020	3451	F260	EF	30	16	3	5	140.333	77.7739	1.6864	NA
HOH	2020	3452	F082	EF	29	16	4	5	146.667	73.0991	1.81407	NA
HOH	2020	3453	GELB.110	GB	28	16	3	5	98.6667	81.2835	NA	NA
HOH	2020	3454	P040	ED	27	16	4	3	122.667	68.86	1.87185	NA
HOH	2020	3455	SATU.137	SM	26	16	13	3	120.333	73.1707	0.0841463	NA
HOH	2020	3456	SATU.176	SM	25	16	3	4	119	67.8785	1.1528	NA
HOH	2020	3457	SATU.270	SM	24	16	8	5	133	69.0983	1.63763	NA
HOH	2020	3458	F054	EF	23	16	3	6	127.333	81.4703	1.30896	NA
HOH	2020	3459	STGA.172	RT	22	16	4	6	99.6667	75.8877	0.259283	NA
HOH	2020	3460	SATU.152	SM	21	16	13	2	114.667	61.1982	0.273352	NA
HOH	2020	3461	S064	ED	20	16	5	5	120.667	62.3327	1.2425	NA
HOH	2020	3462	L050	EF	19	16	2	4	130.667	64.325	1.7282	NA
HOH	2020	3463	FV7	EF	18	16	5	3	92.6667	77.0073	0.056472	NA
HOH	2020	3464	P081	ED	17	16	12	5	135.667	NA	NA	NA
HOH	2020	3465	GELB.135	GB	16	16	7	5	124.667	70.0625	0.267405	NA
HOH	2020	3466	VD03	ED	15	16	5	4	115.667	61.2292	0.910274	NA
HOH	2020	3467	F137	EF	14	16	1	6	143.333	71.0886	1.44073	NA
HOH	2020	3468	WALL.228	WA	13	16	12	3	104.333	68.8391	0.0803123	NA
HOH	2020	3469	SATU.281	SM	12	16	6	4	97.3333	71.4109	0.418944	NA
HOH	2020	3470	WALL.014	WA	11	16	6	3	121.667	72.3214	0.149464	NA
HOH	2020	3471	F040	EF	10	16	1	7	124	81.5584	2.0444	NA
HOH	2020	3472	STGA.158	RT	9	16	8	6	106	81.3101	0.249351	NA
HOH	2020	3473	CAMP.130	CG	8	16	4	5	106.333	81.6082	0.659666	NA
HOH	2020	3474	WALL.301	WA	7	16	16	5	135.667	35.3244	0.217245	NA
HOH	2020	3475	P140	ED	6	16	4	4	141.667	44.0339	0.565835	NA
HOH	2020	3476	F103	EF	5	16	1	5	118.333	81.7169	1.08139	NA
HOH	2020	3477	GELB.122	GB	4	16	7	4	121.333	73.8199	0.388785	NA
HOH	2020	3478	P212	ED	3	16	4	5	145.667	75.9926	0.84985	NA
HOH	2020	3479	SATU.162	SM	2	16	1	3	86.3333	74.2556	0.225242	NA
HOH	2020	3480	P136	ED	1	16	5	3	124.333	71.3004	2.53354	2934.7
HOH	2020	3481	P219	ED	1	17	8	5	140.667	69.1674	0.418463	NA
HOH	2020	3482	D150	EF	2	17	3	4	121.333	80.8017	1.73454	3410.6
HOH	2020	3483	F198	EF	3	17	1	4	126.333	80.4295	1.67025	3002.8
HOH	2020	3484	P351	ED	4	17	5	4	155.333	65.5166	1.65429	NA
HOH	2020	3485	GELB.A127	GB	5	17	16	7	165.667	NA	NA	NA
HOH	2020	3486	WALL.271	WA	6	17	4	4	118.667	74.1303	0.363238	NA
HOH	2020	3487	F045	EF	7	17	3	6	134.667	79.5001	2.5546	NA
HOH	2020	3488	F147	EF	8	17	2	5	128	78.5728	1.69586	NA
HOH	2020	3489	P104	ED	9	17	3	3	105	NA	NA	NA
HOH	2020	3490	WALL.309	WA	10	17	14	4	101.333	NA	NA	NA
HOH	2020	3491	STGA.101	RT	11	17	5	5	111.333	76.9833	0.55428	NA
HOH	2020	3492	F101	EF	12	17	1	6	135.333	82.3483	2.35928	NA
HOH	2020	3493	F108	EF	13	17	2	4	104	78.4547	1.19905	NA
HOH	2020	3494	SATU.163	SM	14	17	9	4	134.667	NA	NA	NA
HOH	2020	3495	P108	ED	15	17	6	5	130.667	68.8885	1.14814	NA
HOH	2020	3496	STRE.205	SF	16	17	6	5	103.333	76.8025	0.30977	NA
HOH	2020	3497	P239	ED	17	17	4	6	151	68.0632	1.09582	NA
HOH	2020	3498	GELB.121	GB	18	17	7	8	157	76.3789	1.20042	NA
HOH	2020	3499	F207	EF	19	17	5	5	131.333	77.0165	1.58782	NA
HOH	2020	3500	GELB.148	GB	20	17	3	7	159	69.2446	0.735147	NA
HOH	2020	3501	WALL.006	WA	21	17	6	3	112.667	68.3932	0.338546	NA
HOH	2020	3502	SATU.224	SM	22	17	10	2	110.333	69.6641	0.127718	NA
HOH	2020	3503	P206	ED	23	17	5	3	103	78.8585	1.44837	NA
HOH	2020	3504	WALL.150	WA	24	17	13	3	94.6667	NA	NA	NA
HOH	2020	3505	SATU.167	SM	25	17	NA	2	78.6667	NA	NA	NA
HOH	2020	3506	SATU.141	SM	26	17	NA	3	94	NA	NA	NA
HOH	2020	3507	CAMP.137	CG	27	17	8	4	121.667	NA	NA	NA
HOH	2020	3508	WALL.209	WA	28	17	2	5	125.667	NA	NA	NA
HOH	2020	3509	L047	EF	29	17	1	6	141.333	77.8331	2.64762	NA
HOH	2020	3510	P409	ED	30	17	3	6	129.333	68.7671	1.11174	NA
HOH	2020	3511	F201	EF	30	18	2	5	148.667	69.9084	1.10921	NA
HOH	2020	3512	SATU.126	SM	29	18	5	4	111.667	77.554	0.562266	NA
HOH	2020	3513	SATU.243	SM	28	18	4	5	126.667	69.3592	0.987213	NA
HOH	2020	3514	F151	EF	27	18	5	4	120.667	72.8307	0.984428	NA
HOH	2020	3515	F186	EF	26	18	7	6	119	80.5385	0.553031	NA
HOH	2020	3516	SATU.278	SM	25	18	6	3	104	80.3694	0.225034	NA
HOH	2020	3517	SATU.169	SM	24	18	4	3	102.667	69.8732	0.609062	NA
HOH	2020	3518	WALL.113	WA	23	18	5	3	86.3333	72.905	0.161606	NA
HOH	2020	3519	P102	ED	22	18	1	5	108.333	72.7498	0.710523	NA
HOH	2020	3520	SATU.123	SM	21	18	7	3	57	62.8499	0.0638974	NA
HOH	2020	3521	P354	ED	20	18	3	3	139	72.7712	0.846572	NA
HOH	2020	3522	STRE.197	SF	19	18	5	3	119.333	78.1802	0.173299	NA
HOH	2020	3523	GELB.158	GB	18	18	15	7	142.333	76.9014	0.24993	NA
HOH	2020	3524	F217	EF	17	18	1	6	117	79.0144	0.940271	NA
HOH	2020	3525	SATU.264	SM	16	18	10	3	130.333	72.1546	0.193615	NA
HOH	2020	3526	P396	ED	15	18	5	4	131	63.3769	0.757354	NA
HOH	2020	3527	P129	ED	14	18	8	2	107.333	69.9327	0.335677	NA
HOH	2020	3528	GELB.A121	GB	13	18	5	5	145	NA	NA	NA
HOH	2020	3529	SATU.235	SM	12	18	15	3	119.667	72.1884	0.10708	NA
HOH	2020	3530	L037	EF	11	18	4	6	152	73.7306	1.36402	NA
HOH	2020	3531	L046	EF	10	18	3	5	133	77.5239	1.80372	NA
HOH	2020	3532	S036	ED	9	18	3	4	120	77.7321	0.93408	NA
HOH	2020	3533	F106	EF	8	18	3	5	131	68.7068	1.83676	NA
HOH	2020	3534	F048	EF	7	18	2	5	120.667	81.5712	1.64774	NA
HOH	2020	3535	P284	ED	6	18	5	5	165	57.8506	1.68827	NA
HOH	2020	3536	WALL.165	WA	5	18	9	3	126.667	64.6067	0.0592228	NA
HOH	2020	3537	WALL.303	WA	4	18	4	5	128.333	62.5727	0.44948	NA
HOH	2020	3538	S058	ED	3	18	0	3	131.333	73.2128	2.69057	2927.6
HOH	2020	3539	STGA.108	RT	2	18	1	5	100.333	NA	NA	NA
HOH	2020	3540	F252	EF	1	18	6	5	130.333	66.3838	0.985799	NA
HOH	2020	3541	WALL.318	WA	1	19	10	3	116.333	NA	NA	NA
HOH	2020	3542	STRE.213	SF	2	19	9	7	117.333	79.3584	0.123006	NA
HOH	2020	3543	P001	ED	3	19	9	5	143.667	66.2383	0.347751	NA
HOH	2020	3544	STGA.303	RT	4	19	6	7	125	78.8506	0.588751	3868.1
HOH	2020	3545	STRE.163	SF	5	19	5	6	130	62.3907	0.345228	NA
HOH	2020	3546	F096	EF	6	19	2	6	141	72.7115	2.85756	NA
HOH	2020	3547	P167	ED	7	19	6	4	NA	51.7732	0.824057	NA
HOH	2020	3548	WALL.012	WA	8	19	7	5	127.333	70.742	0.160349	NA
HOH	2020	3549	F023	EF	9	19	5	6	148.667	71.606	1.7997	NA
HOH	2020	3550	S067	ED	10	19	4	4	129.667	74.0361	0.861287	NA
HOH	2020	3551	P289	ED	11	19	6	5	122.667	NA	NA	NA
HOH	2020	3552	P420	ED	12	19	6	5	122	71.7134	1.44981	NA
HOH	2020	3553	SATU.127	SM	13	19	3	5	123.333	69.5431	1.69801	NA
HOH	2020	3554	F087	EF	14	19	5	6	127	79.4134	1.03237	NA
HOH	2020	3555	P120	ED	15	19	9	4	134.667	59.3738	0.524468	NA
HOH	2020	3556	F242	EF	16	19	5	6	169	63.6978	0.65821	NA
HOH	2020	3557	SATU.269	SM	17	19	NA	3	59.3333	NA	NA	NA
HOH	2020	3558	STRE.165	SF	18	19	4	6	127	76.452	0.257388	NA
HOH	2020	3559	CAMP.301	CG	19	19	3	3	123.333	78.2235	0.0677937	NA
HOH	2020	3560	F262	EF	20	19	4	5	129.667	60.6693	1.38225	NA
HOH	2020	3561	F047	EF	21	19	2	5	124.667	75.9376	1.56938	NA
HOH	2020	3562	P353	ED	22	19	1	5	107.667	76.5526	2.43565	NA
HOH	2020	3563	F240	EF	23	19	3	5	121.333	68.9017	0.978405	NA
HOH	2020	3564	SATU.004	SM	24	19	3	3	108.667	75.1292	0.823917	NA
HOH	2020	3565	P063	ED	25	19	9	3	125.333	NA	NA	NA
HOH	2020	3566	WALL.154	WA	26	19	3	4	131	76.9492	0.765645	NA
HOH	2020	3567	STRE.174	SF	27	19	7	6	116.333	77.1752	0.241816	NA
HOH	2020	3568	F182	EF	28	19	4	6	141.667	81.5587	1.67875	NA
HOH	2020	3569	P159	ED	29	19	5	5	108	71.3426	0.636139	NA
HOH	2020	3570	SATU.008	SM	30	19	6	4	101.667	73.5267	0.296558	NA
HOH	2020	3571	SATU.258	SM	30	20	11	3	108	69.1323	0.110612	NA
HOH	2020	3572	P299	ED	29	20	3	3	109	70.8638	1.48105	NA
HOH	2020	3573	P110	ED	28	20	6	3	113.667	80.0435	0.513612	NA
HOH	2020	3574	WALL.218	WA	27	20	6	5	115	73.4783	0.0514348	NA
HOH	2020	3575	STGA.161	RT	26	20	4	7	109.333	80.0988	0.942496	NA
HOH	2020	3576	WALL.001	WA	25	20	9	4	112.667	70.9998	0.655565	NA
HOH	2020	3577	WALL.316	WA	24	20	11	6	153.333	60.4141	0.502444	NA
HOH	2020	3578	SATU.183	SM	23	20	NA	3	100.667	NA	NA	NA
HOH	2020	3579	WALL.222	WA	22	20	NA	3	96	NA	NA	NA
HOH	2020	3580	SATU.228	SM	21	20	NA	3	19.3333	NA	NA	NA
HOH	2020	3581	WALL.149	WA	20	20	17	5	98.3333	NA	NA	NA
HOH	2020	3582	P352	ED	19	20	3	5	114.667	66.7746	3.3276	NA
HOH	2020	3583	F139.STRE	EF	18	20	7	5	104	78.9727	0.189535	NA
HOH	2020	3584	WALL.169	WA	17	20	NA	4	127.333	NA	NA	NA
HOH	2020	3585	P083	ED	16	20	11	5	116.333	61.2004	0.575284	NA
HOH	2020	3586	P060	ED	15	20	11	4	119.667	56.4823	0.122378	NA
HOH	2020	3587	STRE.130	SF	14	20	6	5	121.333	73.7611	0.408145	NA
HOH	2020	3588	STGA.115	RT	13	20	5	6	114	NA	NA	NA
HOH	2020	3589	D142	EF	12	20	3	7	155	73.9596	1.12049	NA
HOH	2020	3590	STRE.216	SF	11	20	9	5	116.333	NA	NA	NA
HOH	2020	3591	P312	ED	10	20	5	5	125.667	60.0036	2.07713	NA
HOH	2020	3592	F034	EF	9	20	8	6	147.333	74.3916	1.28574	NA
HOH	2020	3593	CAMP.141	CG	8	20	-1	4	143.667	69.6653	0.0766318	NA
HOH	2020	3594	P304	ED	7	20	5	5	129.333	78.6252	2.08619	NA
HOH	2020	3595	WALL.191	WA	6	20	8	4	126.333	63.7828	0.306157	NA
HOH	2020	3596	F030	EF	5	20	-1	6	135	71.9939	2.14902	NA
HOH	2020	3597	F005	EF	4	20	3	7	138.333	75.1832	2.14397	3291.5
HOH	2020	3598	D105	EF	3	20	8	6	110.333	70.7878	0.555684	NA
HOH	2020	3599	SATU.165	SM	2	20	NA	2	61.3333	NA	NA	NA
HOH	2020	3600	D152	EF	1	20	2	4	108	76.2534	0.763805	3826.9
HOH	2020	3601	P344	ED	1	21	7	5	147	44.5119	0.638746	NA
HOH	2020	3602	P335	ED	2	21	6	4	132.667	67.8738	0.575796	NA
HOH	2020	3603	WALL.195	WA	3	21	12	6	126	59.375	0.132604	NA
HOH	2020	3604	GELB.109	GB	4	21	9	6	91.6667	76.0116	0.0646098	NA
HOH	2020	3605	P245	ED	5	21	2	4	119	73.9966	1.36154	NA
HOH	2020	3606	SATU.245	SM	6	21	1	4	103.667	79.373	0.914113	NA
HOH	2020	3607	WALL.108	WA	7	21	9	5	113	75.7956	0.466143	NA
HOH	2020	3608	SATU.140	SM	8	21	9	3	87.6667	79.3103	0.0779885	NA
HOH	2020	3609	P415	ED	9	21	9	5	131	63.5351	0.509339	NA
HOH	2020	3610	F105	EF	10	21	3	6	136.667	66.2827	1.87028	NA
HOH	2020	3611	STRE.306	SF	11	21	4	3	84.6667	NA	NA	NA
HOH	2020	3612	F099	EF	12	21	3	7	153.667	70.4427	2.8858	NA
HOH	2020	3613	STGA.168	RT	13	21	3	7	98.3333	79.0979	0.142376	NA
HOH	2020	3614	STGA.173	RT	14	21	3	5	103.333	79.7701	0.142257	NA
HOH	2020	3615	P085	ED	15	21	3	4	121	69.1912	1.29849	NA
HOH	2020	3616	D146	EF	16	21	9	4	116.667	68.9949	0.221934	NA
HOH	2020	3617	P271	ED	17	21	4	5	152.333	64.282	1.74097	NA
HOH	2020	3618	P034	ED	18	21	6	3	165	74.678	1.19983	NA
HOH	2020	3619	SATU.268	SM	19	21	8	3	111.333	70.2923	0.640832	NA
HOH	2020	3620	L023	EF	20	21	10	4	141	63.8721	0.621689	NA
HOH	2020	3621	F138	EF	21	21	3	6	112	72.6453	1.87425	NA
HOH	2020	3622	WALL.185	WA	22	21	10	2	117	72.0755	0.116522	NA
HOH	2020	3623	F104	EF	23	21	3	5	130	70.2431	1.19647	NA
HOH	2020	3624	STRE.158	SF	24	21	1	4	110.667	78.1181	0.552034	NA
HOH	2020	3625	S018	ED	25	21	4	4	140.667	NA	NA	NA
HOH	2020	3626	P135	ED	26	21	3	6	149	75.4713	1.64024	NA
HOH	2020	3627	GELB.133	GB	27	21	7	6	145.333	70.1654	0.721534	NA
HOH	2020	3628	S028	ED	28	21	9	5	NA	68.3491	0.455661	NA
HOH	2020	3629	F173	EF	29	21	4	6	133.667	77.2809	1.98741	NA
HOH	2020	3630	WALL.134	WA	30	21	7	4	107	76.6251	0.219659	NA
HOH	2020	3631	P250	ED	30	22	3	4	131.667	62.6327	1.74015	NA
HOH	2020	3632	WALL.174	WA	29	22	5	5	79	75.8389	0.0619351	NA
HOH	2020	3633	L016	EF	28	22	7	5	121	73.0341	NA	NA
HOH	2020	3634	STRE.190	SF	27	22	7	6	89.3333	NA	NA	NA
HOH	2020	3635	SATU.186	SM	26	22	20	3	82	NA	NA	NA
HOH	2020	3636	STGA.104	RT	25	22	1	5	66.6667	50	0.075	NA
HOH	2020	3637	STRE.303	SF	24	22	7	6	116.667	79.0223	0.696713	NA
HOH	2020	3638	SATU.212	SM	23	22	16	3	114.667	56.0976	0.0476829	NA
HOH	2020	3639	P194	ED	22	22	4	4	124.333	76.1595	1.78721	NA
HOH	2020	3640	F145	EF	21	22	3	5	129	73.5807	2.06149	NA
HOH	2020	3641	SATU.256	SM	20	22	3	5	136	72.456	1.27522	NA
HOH	2020	3642	FV2	EF	19	22	2	5	109.667	76.8414	0.942588	NA
HOH	2020	3643	CAMP.303	CG	18	22	4	3	96	75.0739	0.147645	NA
HOH	2020	3644	P184	ED	17	22	2	4	97	67.0228	1.42647	NA
HOH	2020	3645	D167	EF	16	22	1	5	123.667	76.8388	1.47018	NA
HOH	2020	3646	F055	EF	15	22	1	6	142.333	71.6062	2.64227	NA
HOH	2020	3647	WALL.251	WA	14	22	14	5	136.667	61.3574	0.207593	NA
HOH	2020	3648	SATU.182	SM	13	22	NA	2	101.667	NA	NA	NA
HOH	2020	3649	WALL.179	WA	12	22	7	6	116.667	61.435	0.26417	NA
HOH	2020	3650	P165	ED	11	22	8	6	144	73.4342	0.544637	NA
HOH	2020	3651	GELB.149	GB	10	22	4	5	138.667	81.1633	0.350355	NA
HOH	2020	3652	P133	ED	9	22	4	5	127.667	73.5556	1.96393	NA
HOH	2020	3653	GELB.106	GB	8	22	12	7	127.667	74.6575	0.0410616	NA
HOH	2020	3654	F050	EF	7	22	1	6	140	NA	NA	NA
HOH	2020	3655	P042	ED	6	22	3	5	135.667	72.6914	2.22557	NA
HOH	2020	3656	P130	ED	5	22	2	5	141.333	72.1368	2.46107	NA
HOH	2020	3657	STRE.172	SF	4	22	5	5	119	81.3519	0.648103	NA
HOH	2020	3658	SATU.135	SM	3	22	4	6	139	71.2609	1.89198	NA
HOH	2020	3659	GELB.A106	GB	2	22	2	7	132	78.1575	0.636984	NA
HOH	2020	3660	P290	ED	1	22	2	6	150.667	64.5286	1.90252	NA
HOH	2020	3661	STRE.208	SF	1	23	6	4	112	70.6569	0.105985	NA
HOH	2020	3662	P106	ED	2	23	4	4	110.667	70.5558	2.02613	NA
HOH	2020	3663	P484	ED	3	23	2	6	145.667	80.2192	3.2676	NA
HOH	2020	3664	F179	EF	4	23	6	6	154.333	83.4091	1.82249	NA
HOH	2020	3665	P024	ED	5	23	4	6	147.667	71.4315	1.61316	NA
HOH	2020	3666	CAMP.107	CG	6	23	-1	6	127.667	76.7299	0.773693	NA
HOH	2020	3667	GELB.A102	GB	7	23	1	8	137.667	NA	NA	NA
HOH	2020	3668	F066	EF	8	23	3	5	128	83.9009	1.90455	NA
HOH	2020	3669	GELB.164	GB	9	23	5	6	105.667	80.9582	0.578851	NA
HOH	2020	3670	WALL.105	WA	10	23	4	5	89	79.5316	0.287639	NA
HOH	2020	3671	WALL.257	WA	11	23	4	4	123	78.355	0.178911	NA
HOH	2020	3672	SATU.248	SM	12	23	3	3	100.667	73.7332	0.652539	NA
HOH	2020	3673	P342	ED	13	23	5	3	137	56.6713	1.52068	NA
HOH	2020	3674	F109	EF	14	23	1	5	133.333	73.0484	2.8635	NA
HOH	2020	3675	F159	EF	15	23	3	6	141	72.4055	2.13114	NA
HOH	2020	3676	P261	ED	16	23	3	5	142	65.8394	0.625474	NA
HOH	2020	3677	L043	EF	17	23	0	5	141.333	80.4221	2.12716	NA
HOH	2020	3678	WALL.219	WA	18	23	5	6	119.667	80.8454	1.02943	NA
HOH	2020	3679	GELB.166	GB	19	23	7	6	138	70.5452	0.17166	NA
HOH	2020	3680	GELB.162	GB	20	23	11	7	120.667	NA	NA	NA
HOH	2020	3681	P357	ED	21	23	4	5	126	73.3113	1.22674	NA
HOH	2020	3682	P033	ED	22	23	5	5	121.667	70.0692	2.06587	NA
HOH	2020	3683	GELB.155	GB	23	23	NA	3	87	NA	NA	NA
HOH	2020	3684	SATU.134	SM	24	23	1	2	115.333	80.0863	0.392423	NA
HOH	2020	3685	GELB.A217	GB	25	23	5	6	127	65.1261	0.0521008	NA
HOH	2020	3686	WALL.254	WA	26	23	5	6	93.6667	76.766	0.258446	NA
HOH	2020	3687	F259	EF	27	23	1	5	116	82.1581	1.80748	NA
HOH	2020	3688	STRE.307	SF	28	23	6	7	123	78.691	0.742319	NA
HOH	2020	3689	WALL.178	WA	29	23	NA	5	124.667	67.8161	0.0791188	NA
HOH	2020	3690	F134	EF	30	23	4	6	129	80.9677	1.55053	NA
HOH	2020	3691	WALL.285	WA	30	24	7	6	83.3333	76.7123	1.20311	NA
HOH	2020	3692	WALL.207	WA	29	24	3	5	107.333	81.6412	0.794641	NA
HOH	2020	3693	WALL.010	WA	28	24	9	4	112	NA	NA	NA
HOH	2020	3694	STRE.127	SF	27	24	7	7	109	79.0853	0.495601	NA
HOH	2020	3695	P188	ED	26	24	4	4	126.333	70.9715	0.630464	NA
HOH	2020	3696	STRE.176	SF	25	24	4	5	126.667	59.5448	0.322535	NA
HOH	2020	3697	GELB.A213	GB	24	24	14	5	121	74.3784	0.317348	NA
HOH	2020	3698	F161	EF	23	24	3	5	130.333	66.3336	1.54999	NA
HOH	2020	3699	P072	ED	22	24	6	5	112.667	66.8254	0.466664	NA
HOH	2020	3700	SATU.014	SM	21	24	3	3	104.333	67.7892	0.384139	NA
HOH	2020	3701	F148	EF	20	24	5	6	121.667	66.0831	0.66854	NA
HOH	2020	3702	SATU.106	SM	19	24	6	4	96.6667	77.8302	0.1375	NA
HOH	2020	3703	L056	EF	18	24	1	7	112.667	79.9133	2.38275	NA
HOH	2020	3704	SATU.240	SM	17	24	10	3	98	69.6665	0.308855	NA
HOH	2020	3705	STRE.219	SF	16	24	9	5	125.667	68.3824	0.165257	NA
HOH	2020	3706	SATU.128	SM	15	24	8	3	128	74.1201	0.491664	NA
HOH	2020	3707	F052	EF	14	24	0	6	108.333	79.5247	2.57395	NA
HOH	2020	3708	F160	EF	13	24	4	6	119.667	75.2278	1.43309	NA
HOH	2020	3709	P096	ED	12	24	2	5	115.667	69.9668	1.7585	NA
HOH	2020	3710	WALL.293	WA	11	24	10	4	103	68.2263	0.289962	NA
HOH	2020	3711	WALL.168	WA	10	24	12	5	89	77.344	0.391876	NA
HOH	2020	3712	STRE.167	SF	9	24	2	6	116.333	81.7299	0.487655	NA
HOH	2020	3713	STRE.146	SF	8	24	7	7	116.333	73.6603	1.08649	NA
HOH	2020	3714	GELB.A220	GB	7	24	2	7	140.667	80.545	0.383931	NA
HOH	2020	3715	S072	ED	6	24	-1	6	135.667	80.1044	2.28965	NA
HOH	2020	3716	WALL.197	WA	5	24	6	6	86	74.7331	0.160676	NA
HOH	2020	3717	L041	EF	4	24	1	6	154.667	81.1019	1.99781	NA
HOH	2020	3718	P127	ED	3	24	4	5	149	73.5128	0.675093	2994.7
HOH	2020	3719	CAMP.001	CG	2	24	4	6	106.667	74.9424	0.348482	NA
HOH	2020	3720	P213	ED	1	24	8	5	100.333	72.378	0.53801	NA
HOH	2020	3721	WALL.296	WA	1	25	6	7	112	73.6043	0.251481	NA
HOH	2020	3722	STRE.155	SF	2	25	7	5	113.667	77.2477	0.166083	NA
HOH	2020	3723	F121	EF	3	25	4	7	157	79.3786	1.91964	NA
HOH	2020	3724	P048	ED	4	25	3	5	120.667	79.5084	1.65907	NA
HOH	2020	3725	F117	EF	5	25	3	6	127.667	74.1157	0.696687	NA
HOH	2020	3726	WALL.277	WA	6	25	6	7	96.6667	70.5804	0.746976	NA
HOH	2020	3727	P182	ED	7	25	1	5	122	74.2959	3.31484	NA
HOH	2020	3728	L007	EF	8	25	4	6	136	64.7665	0.484669	NA
HOH	2020	3729	GELB.130	GB	9	25	3	7	117.333	0	0	NA
HOH	2020	3730	STRE.211	SF	10	25	9	3	100.667	55.1429	0.121314	NA
HOH	2020	3731	GELB.138	GB	11	25	3	4	107	67.3209	0.136886	NA
HOH	2020	3732	F162	EF	12	25	3	5	138.333	68.8181	3.01079	NA
HOH	2020	3733	SATU.196	SM	13	25	4	4	101	79.4702	1.33775	NA
HOH	2020	3734	CAMP.117	CG	14	25	0	5	100.333	82.9162	0.590087	NA
HOH	2020	3735	GELB.A125	GB	15	25	4	5	98.3333	73.1886	0.475726	NA
HOH	2020	3736	D102	EF	16	25	3	5	89	75.4294	0.802065	NA
HOH	2020	3737	F266	EF	17	25	6	6	113.667	NA	NA	NA
HOH	2020	3738	WALL.104	WA	18	25	13	2	107	73.4043	0.103989	NA
HOH	2020	3739	F124	EF	19	25	1	6	98.6667	83.2074	2.07741	NA
HOH	2020	3740	P422	ED	20	25	4	4	113.333	73.175	1.08177	NA
HOH	2020	3741	SATU.129	SM	21	25	3	4	108.333	61.9639	1.12878	NA
HOH	2020	3742	WALL.184	WA	22	25	8	5	92	66.7933	0.257154	NA
HOH	2020	3743	GELB.A219	GB	23	25	11	4	124.667	NA	NA	NA
HOH	2020	3744	P080	ED	24	25	5	5	139.333	71.0323	2.68976	NA
HOH	2020	3745	STRE.214	SF	25	25	9	5	131.667	66.9831	0.144014	NA
HOH	2020	3746	P053	ED	26	25	4	4	114	NA	NA	NA
HOH	2020	3747	P223	ED	27	25	6	4	110.333	66.4855	0.860988	NA
HOH	2020	3748	STRE.201	SF	28	25	0	4	90	81.8839	0.805192	NA
HOH	2020	3749	STRE.212	SF	29	25	NA	4	70.3333	NA	NA	NA
HOH	2020	3750	GELB.129	GB	30	25	11	7	153	81.1037	0.114897	NA
HOH	2020	3751	WALL.143	WA	30	26	12	6	106.667	72.1218	0.156264	NA
HOH	2020	3752	P006	ED	29	26	2	6	131.333	79.09	2.0102	NA
HOH	2020	3753	WALL.317	WA	28	26	7	6	125.333	76.331	0.839641	NA
HOH	2020	3754	L045	EF	27	26	17	5	133	71.0563	0.369493	NA
HOH	2020	3755	CAMP.004	CG	26	26	7	6	86	NA	NA	NA
HOH	2020	3756	STRE.138	SF	25	26	6	6	117.333	69.112	0.059897	NA
HOH	2020	3757	P481	ED	24	26	3	6	131.667	73.6224	0.296944	NA
HOH	2020	3758	P272	ED	23	26	3	3	150.333	51.0463	1.67177	NA
HOH	2020	3759	F142	EF	22	26	3	5	109.333	77.2523	1.06866	NA
HOH	2020	3760	SATU.263	SM	21	26	5	4	73.6667	76.4419	0.468844	NA
HOH	2020	3761	F060	EF	20	26	3	6	121.333	81.7722	2.01977	NA
HOH	2020	3762	WALL.215	WA	19	26	5	3	113	78.8543	0.20765	NA
HOH	2020	3763	P362	ED	18	26	5	5	86.6667	80.4899	0.964538	NA
HOH	2020	3764	F136	EF	17	26	2	7	109	76.4778	2.00627	NA
HOH	2020	3765	SATU.139	SM	16	26	3	7	148	78.639	0.823088	NA
HOH	2020	3766	P330	ED	15	26	7	6	143	58.9331	0.753362	NA
HOH	2020	3767	SATU.257	SM	14	26	0	3	76.6667	80.2863	0.476365	NA
HOH	2020	3768	STRE.156	SF	13	26	0	6	95	77.1282	0.273805	NA
HOH	2020	3769	CAMP.104	CG	12	26	7	5	97	71.7468	0.937492	NA
HOH	2020	3770	WALL.172	WA	11	26	6	7	122.667	60.0976	0.12921	NA
HOH	2020	3771	P074	ED	10	26	6	5	139.667	71.0415	1.44925	NA
HOH	2020	3772	STGA.136	RT	9	26	3	5	101.333	80.6767	0.354978	NA
HOH	2020	3773	F169	EF	8	26	0	7	126.667	80.7054	2.32028	NA
HOH	2020	3774	L060	EF	7	26	4	6	146.333	74.2581	0.553223	NA
HOH	2020	3775	F012	EF	6	26	0	6	125	81.7935	0.977432	NA
HOH	2020	3776	SATU.013	SM	5	26	16	6	115	NA	NA	NA
HOH	2020	3777	P115	ED	4	26	4	7	137.333	78.2116	1.36479	3272.6
HOH	2020	3778	P154	ED	3	26	2	6	103.667	74.9298	1.71964	NA
HOH	2020	3779	S046	ED	2	26	5	7	119.333	71.4027	1.34594	3517.7
HOH	2020	3780	P075	ED	1	26	3	6	129.333	75.5696	1.71921	3191.6
HOH	2020	3781	SATU.130	SM	1	27	6	5	114	71.3235	0.31739	NA
HOH	2020	3782	WALL.297	WA	2	27	4	6	110.667	73.0205	0.480718	NA
HOH	2020	3783	STRE.215	SF	3	27	2	6	140.667	79.4389	0.410434	NA
HOH	2020	3784	CAMP.306	CG	4	27	5	3	102	72.254	0.255298	NA
HOH	2020	3785	SATU.161	SM	5	27	12	2	87.3333	NA	NA	NA
HOH	2020	3786	WALL.260	WA	6	27	16	6	110.333	75.7407	0.0934136	NA
HOH	2020	3787	WALL.151	WA	7	27	4	4	87	76.6601	0.324528	NA
HOH	2020	3788	GELB.104	GB	8	27	3	6	105	NA	NA	NA
HOH	2020	3789	GELB.157	GB	9	27	8	6	123	67.5268	0.812573	NA
HOH	2020	3790	S066	ED	10	27	3	4	111.667	69.2324	0.940407	NA
HOH	2020	3791	SATU.149	SM	11	27	NA	2	83	NA	NA	NA
HOH	2020	3792	GELB.143	GB	12	27	0	7	100.333	74.3948	0.42281	NA
HOH	2020	3793	SATU.237	SM	13	27	7	5	125.333	70.1203	0.421891	NA
HOH	2020	3794	F037	EF	14	27	1	5	130.667	80.771	3.09218	NA
HOH	2020	3795	P209	ED	15	27	1	5	118.667	66.1503	0.405722	NA
HOH	2020	3796	P410	ED	16	27	3	3	135.667	49.0083	0.570947	NA
HOH	2020	3797	F077	EF	17	27	2	5	106.333	80.7039	1.77414	NA
HOH	2020	3798	STGA.151	RT	18	27	6	7	86.3333	81.3545	0.352536	NA
HOH	2020	3799	L035	EF	19	27	2	4	103.667	76.9386	0.8553	NA
HOH	2020	3800	WALL.225	WA	20	27	4	3	93.3333	NA	NA	NA
EWE	2020	5001	CAMP.004	CG	1	1	1	7	130	83.36	0.456396	3561.9
EWE	2020	5002	F084	EF	2	1	-1	8	170	81.51	2.41365	3353.8
EWE	2020	5003	SATU.228	SM	3	1	1	3	100	75.99	0.0307759	2999.5
EWE	2020	5004	P410	ED	4	1	2	4	200	56.6	1.0354	3455.2
EWE	2020	5005	F161	EF	5	1	0	6	170	70.73	2.08276	2986.7
EWE	2020	5006	GELB.164	GB	6	1	3	8	165	81.59	1.05713	3263.3
EWE	2020	5007	P130	ED	7	1	0	6	190	80.46	4.06578	2750.8
EWE	2020	5008	P219	ED	8	1	1	6	195	73.01	3.76756	2950.4
EWE	2020	5009	SATU.137	SM	9	1	5	6	185	73.79	0.0582941	3417.8
EWE	2020	5010	P271	ED	10	1	0	7	200	74.77	4.90554	2515.4
EWE	2020	5011	P154	ED	11	1	1	6	170	80.5	4.10255	2871.7
EWE	2020	5012	WALL.165	WA	12	1	1	5	165	80.48	0.194225	3708.4
EWE	2020	5013	S036	ED	13	1	0	5	160	82.59	4.08256	3187.7
EWE	2020	5014	P006	ED	14	1	1	7	180	80.69	2.3735	2681.7
EWE	2020	5015	SATU.186	SM	15	1	5	6	130	83.33	0.428594	3468.2
EWE	2020	5016	STRE.211	SF	16	1	3	5	160	64.36	0.725015	3440
EWE	2020	5017	F252	EF	17	1	2	7	165	73.92	1.97342	3471.7
EWE	2020	5018	SATU.224	SM	18	1	2	6	145	79.39	0.21647	3290.8
EWE	2020	5019	D152	EF	19	1	1	6	155	83.31	2.41307	3470.2
EWE	2020	5020	F266	EF	20	1	3	7	170	64.21	1.17815	3322.2
EWE	2020	5021	WALL.197	WA	21	1	1	7	125	83.25	0.200355	3706.4
EWE	2020	5022	P409	ED	22	1	0	7	190	73.16	6.07582	2783.7
EWE	2020	5023	F043	EF	23	1	0	8	180	81.49	3.11523	3238.6
EWE	2020	5024	F159	EF	24	1	0	8	190	81.05	2.04003	3372.1
EWE	2020	5025	WALL.178	WA	25	1	0	8	170	68.65	1.29897	3589.1
EWE	2020	5026	SATU.237	SM	26	1	2	6	160	76.82	1.33769	3386.6
EWE	2020	5027	FV2	EF	27	1	-1	7	140	77.62	0.758606	3005
EWE	2020	5028	P060	ED	28	1	-2	7	145	82.57	2.52664	2876.4
EWE	2020	5029	STRE.214	SF	29	1	3	8	180	84.5	0.432077	3549.3
EWE	2020	5030	STRE.155	SF	30	1	4	5	130	85.56	0.204631	3518.7
EWE	2020	5031	WALL.309	WA	31	1	6	7	140	81.58	0.552569	3770.2
EWE	2020	5032	STRE.212	SF	32	1	10	6	115	NA	1.66667e-05	NA
EWE	2020	5033	GELB.166	GB	33	1	0	7	170	86.42	0.0423458	3215.1
EWE	2020	5034	F055	EF	34	1	-3	8	170	77.8	3.26514	3626.2
EWE	2020	5035	WALL.269	WA	35	1	3	8	170	78.98	1.66858	3349.6
EWE	2020	5036	GELB.A127	GB	35	2	12	9	190	86.24	0.0291779	3293.2
EWE	2020	5037	L007	EF	34	2	1	7	180	70.5	3.08955	2931.5
EWE	2020	5038	FV7	EF	33	2	1	7	115	85.1	1.56414	3224.4
EWE	2020	5039	F259	EF	32	2	-1	7	160	86.1	1.79461	3430.6
EWE	2020	5040	P102	ED	31	2	-4	7	160	76.85	3.31006	3177.8
EWE	2020	5041	SATU.245	SM	30	2	0	7	110	81.88	0.917738	3309.2
EWE	2020	5042	SATU.169	SM	29	2	2	6	140	72.68	2.38088	3864.2
EWE	2020	5043	P048	ED	28	2	3	6	150	83.61	2.1106	2990.2
EWE	2020	5044	SATU.152	SM	27	2	10	6	140	72.69	1.07363	3355.2
EWE	2020	5045	F121	EF	26	2	1	8	170	NA	1.66667e-05	NA
EWE	2020	5046	P074	ED	25	2	4	6	175	79.61	3.50284	3388.7
EWE	2020	5047	WALL.006	WA	24	2	6	7	150	80.58	0.697017	3411.7
EWE	2020	5048	SATU.013	SM	23	2	4	7	145	82.12	0.675163	3684.4
EWE	2020	5049	P063	ED	22	2	3	7	180	68	5.49281	2984.9
EWE	2020	5050	SATU.008	SM	21	2	4	6	120	77.83	0.30237	3184.9
EWE	2020	5051	F056	EF	20	2	2	7	140	78.49	2.13951	3882.1
EWE	2020	5052	STRE.208	SF	19	2	6	7	145	85.57	0.450811	3467.4
EWE	2020	5053	S028	ED	18	2	0	7	175	76.6	4.09925	2905.5
EWE	2020	5054	SATU.165	SM	17	2	7	2	105	78.67	0.0955841	3147
EWE	2020	5055	L047	EF	16	2	0	8	190	80.84	4.36523	2587
EWE	2020	5056	F137	EF	15	2	0	8	165	81.14	2.02377	3293.8
EWE	2020	5057	GELB.A217	GB	14	2	0	8	200	82.9	1.00668	3613.4
EWE	2020	5058	SATU.014	SM	13	2	0	6	140	75.38	0.280288	3925.4
EWE	2020	5059	WALL.317	WA	12	2	0	8	170	77.72	1.14507	3407.6
EWE	2020	5060	P127	ED	11	2	0	6	185	77.05	2.7711	2892.9
EWE	2020	5061	F047	EF	10	2	0	7	180	77.44	1.94258	3283.4
EWE	2020	5062	STGA.172	RT	9	2	1	8	175	80.57	1.43347	3557.9
EWE	2020	5063	STRE.219	SF	8	2	3	7	180	81.7	0.897338	3807.7
EWE	2020	5064	P352	ED	7	2	0	7	170	73.61	5.86353	2822.5
EWE	2020	5065	CAMP.141	CG	6	2	-1	7	180	79.4	0.032157	2992.8
EWE	2020	5066	CAMP.306	CG	5	2	0	6	145	75.25	0.513581	3294.3
EWE	2020	5067	D150	EF	4	2	1	7	175	76.4	2.49688	3486.6
EWE	2020	5068	L016	EF	3	2	4	8	150	74.37	1.71869	3201.7
EWE	2020	5069	CAMP.303	CG	2	2	1	6	140	81.04	0.559041	3949.5
EWE	2020	5070	WALL.010	WA	1	2	5	8	145	72.89	1.10574	3632
EWE	2020	5071	P342	ED	1	3	0	6	210	64.75	4.60707	2773.5
EWE	2020	5072	WALL.296	WA	2	3	6	9	160	83.79	0.673532	3502.4
EWE	2020	5073	STRE.163	SF	3	3	-2	7	190	75.19	1.36031	2937.3
EWE	2020	5074	SATU.248	SM	4	3	-1	6	125	77.84	0.395946	3358.4
EWE	2020	5075	SATU.277	SM	5	3	3	6	140	68.25	1.8167	3512
EWE	2020	5076	P122	ED	6	3	1	7	180	77.11	1.67007	2891.3
EWE	2020	5077	GELB.A220	GB	7	3	1	7	175	85.03	0.399499	3066.8
EWE	2020	5078	P223	ED	8	3	0	6	165	72.95	4.24095	3225.4
EWE	2020	5079	P040	ED	9	3	1	5	180	73.33	2.45668	2528.7
EWE	2020	5080	P120	ED	10	3	7	6	180	72.04	1.82874	3057.3
EWE	2020	5081	GELB.157	GB	11	3	2	7	190	74.93	2.76954	3162.9
EWE	2020	5082	F179	EF	12	3	3	8	205	82.69	2.7759	2886
EWE	2020	5083	GELB.A106	GB	13	3	0	8	180	83.4	1.30076	3425.4
EWE	2020	5084	P357	ED	14	3	0	8	190	81.57	4.2275	2759.6
EWE	2020	5085	P289	ED	15	3	0	7	210	70.9	4.69086	2908
EWE	2020	5086	L054	EF	16	3	0	6	175	84.6	1.72951	3169.3
EWE	2020	5087	WALL.222	WA	17	3	4	5	150	80.75	0.297295	2782.3
EWE	2020	5088	GELB.A125	GB	18	3	2	7	135	83.86	1.54736	3304.2
EWE	2020	5089	WALL.277	WA	19	3	0	8	145	78.8	1.5651	3575.8
EWE	2020	5090	WALL.184	WA	20	3	1	8	155	79.65	1.09651	3991.1
EWE	2020	5091	GELB.129	GB	21	3	4	8	200	83.86	0.317969	3040.1
EWE	2020	5092	F124	EF	22	3	-1	8	165	86.49	3.60461	3226.1
EWE	2020	5093	F147	EF	23	3	0	8	180	81.5	3.16573	3394.5
EWE	2020	5094	WALL.271	WA	24	3	2	8	165	79.48	0.827784	3248.7
EWE	2020	5095	L035	EF	25	3	0	7	160	82.9	1.0578	2878
EWE	2020	5096	GELB.109	GB	26	3	1	7	140	86.43	0.130077	3146.4
EWE	2020	5097	P087	ED	27	3	0	6	180	78.51	4.88568	2605.8
EWE	2020	5098	STRE.165	SF	28	3	1	8	175	82.95	0.331938	3463.6
EWE	2020	5099	GELB.A203	GB	29	3	1	8	190	82.83	1.13546	3168.4
EWE	2020	5100	CAMP.301	CG	30	3	0	7	160	84.88	0.325798	3836.9
EWE	2020	5101	F186	EF	31	3	0	8	165	81.92	1.87187	3372
EWE	2020	5102	WALL.150	WA	32	3	2	7	165	86.71	0.63096	3120
EWE	2020	5103	GELB.135	GB	33	3	2	8	160	80.66	1.14927	3348
EWE	2020	5104	L050	EF	34	3	-4	6	160	76.92	4.72109	2982.4
EWE	2020	5105	SATU.123	SM	35	3	5	6	90	77.16	0.104938	3607.3
EWE	2020	5106	WALL.108	WA	35	4	1	8	165	74.91	0.343338	3582.3
EWE	2020	5107	F136	EF	34	4	0	8	170	79.68	3.33222	3312.2
EWE	2020	5108	CAMP.137	CG	33	4	5	8	170	80.98	1.05301	4070.6
EWE	2020	5109	WALL.001	WA	32	4	1	7	150	85.5	1.87929	3363.4
EWE	2020	5110	SATU.263	SM	31	4	2	6	110	78.9	1.77052	3028.8
EWE	2020	5111	WALL.151	WA	30	4	5	6	170	77.56	1.51914	3435
EWE	2020	5112	P330	ED	29	4	1	7	185	72.22	4.66589	3043.1
EWE	2020	5113	WALL.122	WA	28	4	3	7	130	84.28	1.39146	3257.3
EWE	2020	5114	P075	ED	27	4	1	7	185	81.56	2.51857	3085.3
EWE	2020	5115	GELB.104	GB	26	4	1	8	170	85.5	2.29909	2973.6
EWE	2020	5116	F062	EF	25	4	1	7	160	82.52	0.567463	3151.9
EWE	2020	5117	P354	ED	24	4	2	6	210	76.81	3.41024	2688.1
EWE	2020	5118	STRE.156	SF	23	4	-2	7	160	84.98	1.58856	3448.3
EWE	2020	5119	GELB.A102	GB	22	4	-7	9	200	81.51	0.357829	2809.8
EWE	2020	5120	L059	EF	21	4	1	7	185	84.16	2.38776	2721.6
EWE	2020	5121	P001	ED	20	4	3	6	210	74.82	4.86904	2938.5
EWE	2020	5122	F090	EF	19	4	1	7	185	82.69	2.48497	3407.8
EWE	2020	5123	STRE.216	SF	18	4	2	6	165	83.09	1.47042	3577.6
EWE	2020	5124	STRE.205	SF	17	4	1	7	160	85.8	1.21693	3211.3
EWE	2020	5125	WALL.318	WA	16	4	1	6	165	79.81	0.414347	3484.9
EWE	2020	5126	S050	ED	15	4	2	6	210	81.42	4.47973	2848
EWE	2020	5127	F109	EF	14	4	0	7	180	78.21	4.54387	2810.8
EWE	2020	5128	F201	EF	13	4	-1	7	195	76.56	3.51678	3639.2
EWE	2020	5129	F195	EF	12	4	0	8	190	84.01	3.76841	2953.2
EWE	2020	5130	WALL.105	WA	11	4	3	7	150	82.86	0.754026	3686
EWE	2020	5131	P206	ED	10	4	0	7	160	85.68	2.09131	3159.1
EWE	2020	5132	SATU.149	SM	9	4	4	4	115	85.89	0.147874	2867.5
EWE	2020	5133	F217	EF	8	4	-1	7	170	82.9	1.54097	3522.8
EWE	2020	5134	F242	EF	7	4	0	7	210	73.15	1.1626	2856.8
EWE	2020	5135	P106	ED	6	4	2	6	175	74.4	3.41533	2767.2
EWE	2020	5136	CAMP.117	CG	5	4	1	7	140	85.11	1.26303	3909
EWE	2020	5137	F094	EF	4	4	0	7	170	79.49	2.14398	3264.9
EWE	2020	5138	WALL.168	WA	3	4	2	7	140	78.49	1.63024	3363.6
EWE	2020	5139	GELB.110	GB	2	4	0	7	130	85.91	0.612968	3441.4
EWE	2020	5140	SATU.004	SM	1	4	1	7	150	75.82	1.07551	3236.8
EWE	2020	5141	CAMP.104	CG	1	5	3	6	150	70.08	1.61254	3727.2
EWE	2020	5142	P105	ED	2	5	-1	7	165	84.14	3.32199	2915.4
EWE	2020	5143	S066	ED	3	5	1	7	200	73.48	5.22553	2891
EWE	2020	5144	P353	ED	4	5	-1	7	160	79.58	5.09789	2494.2
EWE	2020	5145	GELB.A213	GB	5	5	3	7	190	80.44	0.499398	3210.2
EWE	2020	5146	SATU.218	SM	6	5	9	4	95	77.26	0.0549834	3110.4
EWE	2020	5147	F054	EF	7	5	0	8	170	NA	1.66667e-05	NA
EWE	2020	5148	L041	EF	8	5	0	7	210	82.5	2.41175	2713.5
EWE	2020	5149	F066	EF	9	5	1	7	170	83.99	2.74185	2991.3
EWE	2020	5150	WALL.219	WA	10	5	4	8	170	85.4	1.51528	3337.5
EWE	2020	5151	F260	EF	11	5	-1	7	180	83.07	3.29276	3129.5
EWE	2020	5152	SATU.127	SM	12	5	0	6	150	77.83	1.58643	3302.5
EWE	2020	5153	D105	EF	13	5	1	7	165	71.81	1.72021	2891.7
EWE	2020	5154	STGA.158	RT	14	5	0	8	160	84.09	0.586668	3136.2
EWE	2020	5155	F110	EF	15	5	-1	7	160	85.17	2.80664	3679.8
EWE	2020	5156	GELB.138	GB	16	5	-4	6	150	77.3	0.435843	3216.1
EWE	2020	5157	P420	ED	17	5	-1	7	180	80.34	3.97549	3009.1
EWE	2020	5158	P213	ED	18	5	4	7	145	80.26	1.72934	2869.2
EWE	2020	5159	D102	EF	19	5	-1	7	155	77.52	1.5659	3186
EWE	2020	5160	P140	ED	20	5	-1	7	210	75.2	3.59067	3202.1
EWE	2020	5161	WALL.012	WA	21	5	6	7	180	79.55	1.14579	3270.6
EWE	2020	5162	P351	ED	22	5	-1	7	185	81.7	5.56785	2581.7
EWE	2020	5163	WALL.014	WA	23	5	1	7	175	85.21	0.774701	3175.4
EWE	2020	5164	STGA.108	RT	24	5	-1	8	145	82.7	0.744438	4251
EWE	2020	5165	P194	ED	25	5	0	7	170	79.38	4.03105	3055.2
EWE	2020	5166	P104	ED	26	5	0	6	180	86.28	3.08163	3149.6
EWE	2020	5167	L037	EF	27	5	0	7	170	82.55	3.1036	3092
EWE	2020	5168	P096	ED	28	5	0	6	160	79.55	3.45525	2782.5
EWE	2020	5169	F034	EF	29	5	3	8	185	84.4	2.2954	3542.3
EWE	2020	5170	P085	ED	30	5	0	7	160	76.99	1.73497	3484.6
EWE	2020	5171	P385	ED	31	5	4	8	170	82.67	1.5276	3282.7
EWE	2020	5172	STGA.161	RT	32	5	1	9	165	81.16	2.03346	3363.4
EWE	2020	5173	F198	EF	33	5	0	7	160	85.41	2.91476	2980
EWE	2020	5174	P272	ED	34	5	1	6	200	69.97	2.257	2962.7
EWE	2020	5175	S046	ED	35	5	-1	7	170	73.93	3.85188	3149.7
EWE	2020	5176	SATU.139	SM	35	6	1	9	195	81.62	2.54369	2984.7
EWE	2020	5177	STGA.101	RT	34	6	1	7	130	86.11	0.701366	3482.3
EWE	2020	5178	P024	ED	33	6	1	7	200	73.81	4.97762	3216.2
EWE	2020	5179	SATU.257	SM	32	6	0	6	115	80.01	0.679152	2750.5
EWE	2020	5180	P133	ED	31	6	0	7	180	82.45	3.55895	3255.3
EWE	2020	5181	P275	ED	30	6	0	7	220	73.32	4.8038	2691.6
EWE	2020	5182	P053	ED	29	6	1	7	195	79.11	3.86531	2586.6
EWE	2020	5183	F060	EF	28	6	2	8	160	86.18	2.94922	3009.6
EWE	2020	5184	P415	ED	27	6	3	7	180	75.43	2.12775	3264
EWE	2020	5185	F023	EF	26	6	1	9	180	81.35	4.39697	3339.8
EWE	2020	5186	WALL.189	WA	25	6	5	7	180	77.7	0.632478	3730.6
EWE	2020	5187	F103	EF	24	6	0	8	170	83.51	2.97031	3503.4
EWE	2020	5188	WALL.169	WA	23	6	7	8	170	83.12	0.0709291	3570.1
EWE	2020	5189	WALL.104	WA	22	6	8	7	170	79.1	0.250352	3493.3
EWE	2020	5190	P239	ED	21	6	1	8	195	81.81	3.5871	3035.2
EWE	2020	5191	GELB.A216	GB	20	6	2	8	170	85.19	1.08404	3245.8
EWE	2020	5192	S067	ED	19	6	0	8	170	78.9	5.10536	2924.3
EWE	2020	5193	F207	EF	18	6	0	8	190	78.16	3.28129	3235.5
EWE	2020	5194	WALL.251	WA	17	6	5	8	190	78.64	1.15758	3465.5
EWE	2020	5195	L056	EF	16	6	1	9	185	85.11	3.54327	3034.8
EWE	2020	5196	P115	ED	15	6	1	8	200	79.11	1.76877	3248.5
EWE	2020	5197	STRE.305	SF	14	6	3	9	180	83.73	0.135363	3067.4
EWE	2020	5198	SATU.256	SM	13	6	2	7	180	75.52	3.63641	3097.3
EWE	2020	5199	F048	EF	12	6	1	8	165	85.43	2.81449	3235.1
EWE	2020	5200	SATU.290	SM	11	6	0	7	150	83.84	2.01202	3810.9
EWE	2020	5201	WALL.215	WA	10	6	3	8	170	85.16	0.393013	3395.6
EWE	2020	5202	WALL.270	WA	9	6	1	6	135	82.68	0.552716	3262.4
EWE	2020	5203	VD03	ED	8	6	2	7	170	78.55	4.13448	3312.1
EWE	2020	5204	WALL.228	WA	7	6	1	7	170	NA	1.66667e-05	NA
EWE	2020	5205	F012	EF	6	6	-1	7	160	86.14	0.135383	3123.4
EWE	2020	5206	SATU.128	SM	5	6	2	6	180	73.2	1.8461	3247.2
EWE	2020	5207	SATU.196	SM	4	6	2	6	120	79.1	1.10186	2975.6
EWE	2020	5208	GELB.122	GB	3	6	1	8	175	80.84	1.72149	3179.8
EWE	2020	5209	WALL.175	WA	2	6	1	9	200	76.27	2.2806	3140.7
EWE	2020	5210	GELB.143	GB	1	6	0	8	190	75.61	1.04065	3553
EWE	2020	5211	STRE.146	SF	1	7	3	9	170	80.21	2.16273	3185.5
EWE	2020	5212	GELB.162	GB	2	7	2	9	170	77.67	0.817736	3158.7
EWE	2020	5213	WALL.260	WA	3	7	5	8	175	80.64	0.248371	3738.2
EWE	2020	5214	F162	EF	4	7	1	7	160	76.85	1.97415	3201.1
EWE	2020	5215	STRE.213	SF	5	7	9	8	150	84.7	0.105169	3178.5
EWE	2020	5216	STRE.176	SF	6	7	1	8	180	81.94	1.00909	3646.3
EWE	2020	5217	F142	EF	7	7	0	8	180	NA	1.66667e-05	NA
EWE	2020	5218	STRE.201	SF	8	7	0	7	185	85.72	2.01956	3358
EWE	2020	5219	WALL.128	WA	9	7	4	7	180	77.79	0.201735	3344.1
EWE	2020	5220	P110	ED	10	7	-1	7	170	85.32	2.28743	3112.5
EWE	2020	5221	F154	EF	11	7	0	8	185	86.63	4.00274	3332.7
EWE	2020	5222	CAMP.130	CG	12	7	1	7	150	84.53	0.635806	3292.2
EWE	2020	5223	STRE.190	SF	13	7	1	7	160	78.68	0.283248	3358.8
EWE	2020	5224	SATU.161	SM	14	7	2	4	120	79.98	0.211281	2705.2
EWE	2020	5225	STRE.174	SF	15	7	2	8	165	83.86	0.823505	3352.5
EWE	2020	5226	P362	ED	16	7	0	7	160	84.91	2.92331	3094.4
EWE	2020	5227	P182	ED	17	7	1	7	180	77.73	6.50587	2695.8
EWE	2020	5228	GELB.A219	GB	18	7	1	7	180	74.68	1.15405	3324.9
EWE	2020	5229	STGA.168	RT	19	7	4	8	160	84.67	0.508867	3304.2
EWE	2020	5230	CAMP.107	CG	20	7	1	6	150	79.96	1.2046	3768.8
EWE	2020	5231	P165	ED	21	7	0	7	180	76.64	3.42721	3145.2
EWE	2020	5232	P335	ED	22	7	0	7	190	74.72	0.274098	2994.6
EWE	2020	5233	F108	EF	23	7	0	7	125	83.16	1.50617	3052.8
EWE	2020	5234	WALL.316	WA	24	7	3	9	180	74.86	1.2695	3321.5
EWE	2020	5235	GELB.158	GB	25	7	9	8	185	84.13	0.889815	3310.4
EWE	2020	5236	SATU.258	SM	26	7	0	7	140	79.7	0.575036	3280
EWE	2020	5237	L012	EF	27	7	1	7	195	76.64	4.18442	3020.9
EWE	2020	5238	WALL.195	WA	28	7	8	8	180	70.98	1.86512	3471.8
EWE	2020	5239	SATU.268	SM	29	7	1	6	175	74.12	1.21619	3471.8
EWE	2020	5240	F030	EF	30	7	-1	8	170	78.04	4.58745	3099.2
EWE	2020	5241	F088	EF	31	7	0	8	195	81.33	3.1739	3004.4
EWE	2020	5242	P284	ED	32	7	1	7	220	71.08	4.16079	2726.1
EWE	2020	5243	F104	EF	33	7	0	6	165	77.96	2.66779	3237.8
EWE	2020	5244	P129	ED	34	7	2	6	165	81.24	2.18712	3005.4
EWE	2020	5245	P261	ED	35	7	-1	8	190	71.31	2.89245	3295.3
EWE	2020	5246	P083	ED	35	8	4	7	165	72.43	2.44113	2796.3
EWE	2020	5247	WALL.207	WA	34	8	4	8	140	85.06	1.39413	3621.4
EWE	2020	5248	WALL.172	WA	33	8	7	9	180	77.55	0.126536	3449.7
EWE	2020	5249	WALL.293	WA	32	8	5	7	145	78.41	0	3413
EWE	2020	5250	STGA.151	RT	31	8	4	8	140	85.76	0.566731	3752.6
EWE	2020	5251	S064	ED	30	8	-1	7	160	79.22	5.09451	2848
EWE	2020	5252	F105	EF	29	8	-1	8	165	75.34	2.36643	3248.8
EWE	2020	5253	GELB.148	GB	28	8	0	8	215	81.85	1.71721	3488.3
EWE	2020	5254	SATU.212	SM	27	8	0	7	180	74.45	1.11539	3782.1
EWE	2020	5255	P250	ED	26	8	1	7	195	77.34	2.79932	3328.7
EWE	2020	5256	STRE.215	SF	25	8	3	9	185	85.98	0.520895	3463.5
EWE	2020	5257	F077	EF	24	8	0	8	155	85.12	2.58524	3092.5
EWE	2020	5258	GELB.155	GB	23	8	1	7	150	78.12	0.205195	3419
EWE	2020	5259	L060	EF	22	8	1	7	190	83.7	2.63864	3038.3
EWE	2020	5260	P092	ED	21	8	0	6	170	76.65	1.35351	3163.6
EWE	2020	5261	S072	ED	20	8	-1	7	195	85.72	4.25628	2817.2
EWE	2020	5262	P422	ED	19	8	0	7	195	82.2	2.82508	2921.2
EWE	2020	5263	F173	EF	18	8	0	8	195	78.43	3.35144	3546.7
EWE	2020	5264	P159	ED	17	8	0	6	180	76.28	3.099	3533.7
EWE	2020	5265	P034	ED	16	8	3	7	220	79.59	3.19594	3088.4
EWE	2020	5266	P481	ED	15	8	0	7	210	81.32	3.37668	3230.8
EWE	2020	5267	P150	ED	14	8	1	6	195	72.57	5.57156	2785.6
EWE	2020	5268	WALL.185	WA	13	8	4	7	200	83.7	0.299925	3598.4
EWE	2020	5269	P135	ED	12	8	0	8	195	81.28	3.11221	3278.8
EWE	2020	5270	F182	EF	11	8	3	8	190	81.65	2.2002	3770
EWE	2020	5271	P360	ED	10	8	-2	8	180	84.97	3.2535	3242.4
EWE	2020	5272	SATU.282	SM	9	8	0	7	145	68.65	1.54073	3255.5
EWE	2020	5273	L051	EF	8	8	-1	8	170	83.73	3.71482	2895.1
EWE	2020	5274	GELB.133	GB	7	8	2	8	190	85.13	0.119324	3158
EWE	2020	5275	WALL.297	WA	6	8	0	8	165	77.12	1.31065	3361.2
EWE	2020	5276	SATU.235	SM	5	8	6	6	160	65.82	0.868495	3274.1
EWE	2020	5277	P184	ED	4	8	1	7	130	74.16	3.4985	2975.8
EWE	2020	5278	STGA.182	RT	3	8	3	8	120	84.27	0.955341	3647
EWE	2020	5279	P042	ED	2	8	0	7	185	75.39	4.49123	3285.5
EWE	2020	5280	GELB.130	GB	1	8	0	8	170	86.53	2.18301	3392.2
EWE	2020	5281	P081	ED	1	9	0	7	190	77.61	2.13997	3600.1
EWE	2020	5282	STGA.136	RT	2	9	3	7	130	76	0.75772	3313.9
EWE	2020	5283	STRE.109	SF	3	9	1	8	160	78.69	1.90745	3251.1
EWE	2020	5284	P484	ED	4	9	-1	8	220	85	5.46295	2754.4
EWE	2020	5285	STRE.158	SF	5	9	2	7	150	86.83	0.851513	3259.2
EWE	2020	5286	SATU.129	SM	6	9	0	7	175	64.46	2.55143	3211.4
EWE	2020	5287	P212	ED	7	9	0	7	190	81.39	2.74881	3190.4
EWE	2020	5288	P344	ED	8	9	0	6	210	63.24	2.98735	2865.4
EWE	2020	5289	P383	ED	9	9	-1	7	170	74.21	3.82008	2378.9
EWE	2020	5290	P072	ED	10	9	0	8	190	78.89	1.51811	3004.6
EWE	2020	5291	SATU.140	SM	11	9	5	6	145	84.93	0.64292	3315
EWE	2020	5292	WALL.174	WA	12	9	1	8	150	79.38	0.423889	3806.5
EWE	2020	5293	WALL.209	WA	13	9	0	8	170	81.45	1.06238	3894
EWE	2020	5294	L043	EF	14	9	-2	8	200	82.98	4.70967	3290.1
EWE	2020	5295	D142	EF	15	9	-1	8	210	75.04	1.86137	3419.5
EWE	2020	5296	F037	EF	16	9	0	7	190	83.32	4.43804	3378
EWE	2020	5297	GELB.A119	GB	17	9	0	6	180	84.29	0.362868	3627.8
EWE	2020	5298	SATU.182	SM	18	9	8	4	170	77.58	0.0771921	3263.3
EWE	2020	5299	P136	ED	19	9	0	6	190	79.53	6.43901	2821.8
[truncated: 501 more rows]

## Sheet: BLUEs_series
Name_pretty	ASI	EV	Final_PH	GDM	GY	P_conc
CAMP.001	1.24217	5.83175	147.54	80.3421	0.522404	3938.44
CAMP.004	3.11215	5.07067	110.433	80.9543	0.147673	3401.3
CAMP.104	4.52646	5.16272	127.863	70.385	1.59978	3603.39
CAMP.107	1.38813	4.37176	138.513	74.1881	0.632328	3745.53
CAMP.117	0.843614	5.47376	129.034	80.2018	1.1013	3825.56
CAMP.130	3.00019	4.79972	124.048	78.6145	0.850115	3149.41
CAMP.137	5.81771	4.88391	147.965	70.2669	0.518203	3896.78
CAMP.141	0.664821	5.42567	163.721	85.2397	0.576756	2934.57
CAMP.301	2.18023	5.11665	148.498	77.0599	0.193761	3449.74
CAMP.303	2.7001	4.45204	126.319	74.4682	0.330229	3661.24
CAMP.306	3.93413	3.62757	120.992	70.9804	0.640122	3211.46
D102	2.03669	5.77185	124.197	74.9012	0.958566	3193.69
D105	4.77567	6.05955	142.677	71.2196	2.39466	2970.23
D107	2.38141	6.19806	131.44	66.9029	1.78254	3320.79
D142	2.27573	7.19697	179.401	72.9087	1.64509	3246.21
D146	2.83114	5.35665	145.512	72.7722	1.56467	3556.35
D150	1.65321	5.62424	156.35	77.4423	2.60765	3232.03
D152	1.39052	4.72679	137.9	78.1133	1.99236	3600.67
D167	0.514192	5.77312	162.496	78.1399	2.5915	3610.11
D171	0.886435	6.5825	140.753	78.9942	2.66717	3130.71
EP1	5.28588	5.38948	137.155	68.5775	1.26571	4125.69
F005	2.50888	7.35531	170.633	75.9327	3.45085	3045.64
F012	0.040385	5.738	146.184	80.7307	1.52163	3119.55
F023	3.00432	6.82106	164.182	72.8726	3.14576	3152.83
F030	0.867333	6.10106	152.303	72.466	4.07586	3130.58
F034	4.9232	6.53961	165.388	78.2545	2.42145	3557.55
F037	1.19207	5.76129	170.366	79.1114	3.65619	3329.03
F040	-0.21479	6.68293	150.254	81.9107	3.09942	3159.06
F043	0.978559	6.02977	160.348	75.3381	3.1786	3281.17
F045	1.337	6.00238	157.675	77.9607	3.46425	3224.2
F047	1.36556	5.97996	151.027	76.2371	2.41406	3284.36
F048	2.32413	5.58323	150.2	81.7047	2.67115	3289.58
F050	0.880116	5.60464	155.886	77.8152	2.54575	3247.97
F052	0.893136	5.9782	149.46	77.3154	3.00269	3359.63
F054	1.14181	6.40305	158.592	81.3373	2.07174	3134.85
F055	-0.777646	6.90861	166.672	72.1633	4.06074	3249.57
F056	2.46404	5.72013	135.111	75.5728	2.40638	3721.57
F060	2.12771	6.18232	149.698	79.7327	3.02806	3037.1
F062	5.17336	4.98277	147.149	76.9123	1.35844	3298.05
F066	2.49101	4.94855	148.029	80.1172	1.86949	3163.48
F077	1.02571	4.87019	138.528	78.8809	1.84392	3272.79
F082	2.28329	5.55473	169.35	74.5975	2.61303	3303.29
F084	-0.0781173	6.42328	159.026	78.8741	2.81081	3212.54
F087	2.96165	6.01552	148.44	81.2733	1.7445	2977.16
F088	2.18086	7.18611	175.733	76.7264	3.15794	3026.83
F090	2.5105	5.10925	155.629	78.2352	1.88653	3264.22
F094	1.15109	5.18276	143.188	77.8833	1.69972	3326.87
F096	1.85572	5.40206	164	72.1934	3.22697	3222.83
F099	2.17279	6.56548	175.098	70.3006	3.98133	3217.76
F101	0.532595	5.97922	153.491	81.1395	2.90583	3219.41
F103	1.08887	5.28543	149.618	78.8436	1.91884	3639.72
F104	1.48078	5.27688	150.671	72.7642	2.58539	3228.78
F105	2.1412	6.50166	150.79	70.1047	2.7573	3223.17
F106	2.00079	4.73174	162.012	69.9404	2.90666	3292.68
F108	1.14869	5.05394	118.487	77.0767	2.37184	3181.19
F109	1.85985	5.08211	151.869	73.235	3.12336	2866.55
F110	0.570235	5.75263	140.663	80.2027	2.41993	3749.52
F117	5.24664	5.97322	151.75	69.944	0.642562	3401.01
F121	2.81506	6.05642	164.782	77.3288	2.0539	3401.61
F124	0.366614	5.51848	140.034	81.4395	2.86162	3163.18
F134	3.02418	5.5252	147.824	79.7823	1.82331	3139.46
F136	1.56587	6.98748	159.293	75.1368	2.85489	3383.82
F137	1.01972	6.18805	159.952	74.1816	1.97812	3180.07
F138	1.80072	5.6244	129.62	74.9667	2.25958	3297.24
F139.STRE	2.471	5.64702	131.783	75.669	1.10455	2967.73
F142	1.32772	5.33243	145.766	79.2652	2.44018	3213.8
F145	0.938199	5.96882	163.263	75.1093	3.59336	3390.7
F147	1.20036	6.00422	159.925	77.3707	2.87087	3324.63
F148	1.8123	5.45096	169.551	69.3821	0.924007	3445.16
F151	2.64702	4.81816	143.417	75.3834	2.61645	2999.44
F154	1.33339	5.96716	152.665	78.9397	3.49959	3204.7
F159	2.51936	6.32121	156.441	75.7472	2.21665	3216.49
F160	2.2117	5.84186	143.124	77.656	1.47954	3250.61
F161	1.77586	5.4321	168.2	68.1426	2.89178	2964.1
F162	1.03056	5.30384	163.497	71.1859	4.05308	3008.81
F169	0.385849	6.81223	154.668	78.4552	3.15138	3304.81
F173	2.09237	6.25884	163.459	75.9606	2.83904	3438.88
F179	3.76384	6.17653	172.314	79.9245	2.28093	3151.43
F182	2.64966	6.29206	164.622	78.7255	2.7469	3622.8
F186	2.82977	6.14016	146.782	78.6653	1.31323	3206.47
F195	0.783159	6.28208	163.857	79.2197	2.73121	3010.82
F198	2.55612	4.53115	141.137	79.345	1.61278	3007.09
F201	1.30524	5.60144	169.918	71.9364	2.99528	3511.53
F207	2.45622	5.78272	158.178	76.2089	2.62306	3238.51
F217	0.125077	6.15015	143.32	78.2927	1.49521	3385.01
F240	0.690513	5.54811	158.04	71.7302	1.98452	3138.88
F242	2.43641	5.85995	191.32	67.3463	2.02383	3012.18
F252	5.72911	5.75075	156.773	70.3	1.42762	3241.81
F259	1.36291	5.74527	146.133	80.222	1.67512	3401.14
F260	1.23625	5.27745	161.163	78.8193	2.43161	2979.62
F262	2.83617	6.00562	153.338	67.9942	3.15194	3324.59
F266	5.73108	5.86216	156.126	60.4006	1.35418	3245.48
FV2	0.703643	4.94703	132.18	74.7058	1.21607	3247.47
FV7	2.1252	4.76276	112.939	79.1626	1.60858	3206.23
GELB.104	2.34988	6.0837	138.512	76.5805	1.37624	3052.92
GELB.106	6.48185	6.65782	159.708	75.0085	0.174981	3433.41
GELB.109	5.17669	5.79203	121.691	78.253	0.212192	3034.83
GELB.110	2.99209	5.66107	113.201	80.8368	0.681511	3232.11
GELB.121	3.55746	8.44707	202.19	77.472	4.49223	3200.67
GELB.122	3.84269	5.53983	145.652	75.3078	0.759634	2900.58
GELB.129	6.28364	7.12193	176.178	73.218	0.299902	3051.54
GELB.130	1.4696	6.24103	134.645	78.9503	0.794857	3364.73
GELB.133	4.41174	6.66224	172.631	73.4914	1.30368	2930.44
GELB.135	5.418	6.70649	141.274	73.1247	0.721202	3301.11
GELB.138	1.45791	4.05148	140.498	70.4135	0.388016	3088.24
GELB.143	0.0661928	6.85798	152.909	73.2233	0.755202	3437.63
GELB.148	2.86665	5.99174	167.804	71.3529	0.946312	3192.14
GELB.149	3.814	5.42008	154.303	78.8043	0.320521	3344.17
GELB.155	5.23647	4.84185	126.229	71.7441	-0.153243	3135.09
GELB.157	5.01357	5.76253	162.04	68.9142	2.01465	3052.33
GELB.158	8.62322	7.28619	178.024	75.7354	0.87696	3238.94
GELB.162	7.47762	7.02319	153.098	65.5799	0.819157	2969.89
GELB.164	3.86028	7.0776	146.993	77.7235	1.03743	3457.82
GELB.166	4.83938	5.94528	155.825	73.997	0.424867	3154.11
GELB.A102	1.35799	7.90282	177.868	72.5437	1.1811	2902.57
GELB.A106	1.36777	6.35451	159.637	77.1895	1.63849	3400.38
GELB.A119	5.35774	5.62434	140.062	74.8846	0.606876	3586.69
GELB.A121	5.48787	5.8412	168.434	70.52	-0.215976	3093.32
GELB.A122	2.32914	6.11605	135.637	73.6632	0.401638	3691.73
GELB.A125	2.91043	5.59061	117.584	75.972	0.627281	3249.51
GELB.A127	9.51001	7.38077	190.771	79.5323	0.240366	3231.88
GELB.A203	0.676323	6.64344	163.83	75.1633	0.801142	2961.15
GELB.A213	7.11788	5.70622	158.711	74.4301	0.761884	3158.12
GELB.A216	3.50281	5.8672	151.443	77.8644	0.742947	3230.63
GELB.A217	2.86306	6.27414	163.749	73.9936	0.689806	3373.62
GELB.A219	5.45227	5.83619	160.13	68.4659	1.07784	3194.47
GELB.A220	1.80186	6.43036	156.981	77.2401	0.407802	3124.21
L007	4.0192	5.65635	163.514	66.1594	1.73815	2766.54
L012	3.95421	5.47154	179.659	68.3636	3.41853	3143.06
L016	4.32296	5.32234	141.19	69.9231	1.68439	3068.08
L023	5.16631	5.15425	163.097	70.8028	1.91814	3214.15
L035	2.19565	5.1043	140.981	75.6404	2.9524	3005.1
L037	1.3117	5.8388	162.865	75.2405	3.09623	3271.19
L041	0.130888	5.72087	177.017	78.9388	2.84527	3094.28
L043	-0.322439	5.83365	167.263	78.4571	3.61904	3293.47
L045	3.7999	5.90827	161.151	69.8199	2.59052	2819.15
L046	1.47823	5.73776	154.627	77.2207	3.02239	3032.26
L047	0.299826	5.47455	167.76	77.3365	3.49051	2725.82
L050	-0.841775	4.82607	157.55	68.5553	3.42456	3093.09
L051	-0.314672	5.8971	157.488	79.9898	3.55387	3058.45
L054	2.82891	4.69054	154.597	74.5316	1.46769	3331.31
L056	1.1535	6.21562	154.62	77.4817	3.06225	3094.73
L059	2.15076	5.1907	159.967	79.0361	2.30252	2923.03
L060	2.86403	5.54328	167.341	75.3735	2.18442	2946.61
P001	5.32748	5.16253	172.316	68.1961	3.65021	2828.62
P006	3.28524	5.98059	163.617	75.851	2.48371	2826.92
P024	2.84161	5.62532	169.228	68.1319	3.87899	3100.2
P033	2.31438	5.64627	149.988	73.7148	4.06275	3123.58
P034	4.00054	4.98928	186.962	75.3535	2.90742	2953.74
P040	1.6395	4.16745	158.161	68.7403	2.72986	2858.92
P042	1.50998	5.36505	156.368	70.8001	4.09768	3238.61
P048	3.46142	5.06699	142.593	76.1576	2.72792	2820.68
P053	1.33603	5.16417	159.375	72.1433	3.65775	2522.11
P060	4.53328	4.59851	139.648	70.787	2.22496	2880.49
P063	4.50318	5.10014	157.318	65.1781	4.64795	2809.07
P065	2.01618	4.95479	177.478	70.1288	3.38143	2920.68
P066	0.552927	4.90751	166.001	75.6671	3.01729	2841.09
P072	1.98582	5.59857	156.689	73.0487	1.83606	2942.16
P074	3.55071	4.44885	163.182	70.4644	2.61875	3251.56
P075	2.78841	5.39215	158.657	74.4968	3.2746	2966.62
P080	1.68314	5.63195	176.446	72.9661	4.20624	3071.92
P081	4.17337	5.50558	163.506	70.45	1.37653	3336.85
P083	6.35393	5.13817	145.854	63.1268	1.98934	2685.19
P085	2.02649	4.90841	148.106	70.8619	2.01235	3460.88
P087	3.15353	4.03659	152.048	72.9967	3.69352	2585.03
P092	2.1789	4.02807	150.201	70.6938	1.83778	3162.13
P096	1.54329	4.36466	133.509	71.6651	3.31342	2855.14
P102	-2.47466	5.69972	148.046	73.1633	2.86537	3183.98
P104	0.00759391	4.56895	154.682	79.2021	2.44654	2922.76
P105	0.108356	4.68275	151.345	79.6239	2.83848	3020.58
P106	1.55117	4.97572	152.272	72.1738	3.91588	2711.15
P108	1.99468	5.82689	149.263	72.8107	3.0065	2901.54
P110	1.16908	4.60753	147.526	79.1778	1.94315	3084.35
P115	2.59162	6.0143	166.255	73.7797	1.95204	2989.8
P120	6.82069	4.83912	163.536	65.4547	1.67873	2924.07
P122	3.05814	5.14601	165.679	72.0026	1.434	2779.01
P127	2.12525	4.79319	165.177	73.6126	2.35089	2794.18
P129	3.05997	4.04384	133.77	74.1256	2.029	3030.96
P130	0.138129	5.19545	167.187	73.8683	4.71872	2845.1
P133	0.844919	5.26511	162.488	76.3245	3.22004	3131.79
P135	1.2525	6.34407	162.971	74.9342	2.68658	3239.92
P136	2.01337	4.9332	154.07	71.2014	4.87069	2684.37
P140	0.527381	5.11243	178.286	61.8774	3.49086	3032.28
P150	2.29421	3.84914	156.107	69.7974	3.88032	2745.67
P154	0.343725	5.60489	142.55	74.3075	3.68735	2728.62
P159	3.67734	4.80198	141.409	71.2624	2.17824	3197.82
P165	3.64152	5.86529	156.679	73.5829	2.29874	3178.18
P167	2.18076	4.5392	193.301	56.4581	2.98852	2666.19
P182	1.541	5.31211	146.884	72.7956	4.52438	2729.1
P184	1.17834	4.95358	118.87	68.914	3.09275	2878.99
P188	1.31207	4.63774	149.384	71.3591	2.31668	3031.11
P194	1.65645	5.36047	144.673	75.2953	3.78974	2953.58
P206	1.6269	5.2519	136.582	79.5714	2.7472	3190.63
P209	-0.12185	5.58522	136.803	71.3463	2.96316	2862.41
P212	2.55995	5.72581	167.327	75.8967	2.37766	3142.48
P213	5.52023	4.88889	132.032	72.228	1.7913	2841.41
P219	2.62436	5.75784	166.417	69.7093	3.19408	2877
P223	1.16137	5.10798	148.115	68.3611	3.01133	3217.58
P239	1.63934	6.02309	180.6	73.7868	2.92537	3025.32
P245	1.20325	5.22992	157.876	75.3578	4.5637	2806.5
P250	1.48232	4.52848	156.136	66.7089	2.60789	3076.93
P261	1.66478	5.8131	169.449	70.8178	2.17585	3134.54
P271	1.70577	5.5627	183.508	66.7419	4.31536	2650.92
P272	0.849229	3.79784	187.055	59.8239	2.4406	2705.23
P275	3.14728	5.6584	193.243	65.1729	4.19796	2875.16
P284	2.14599	4.83916	189.455	61.6965	2.54125	2730.16
P289	1.57724	5.52495	172.287	62.4312	3.95493	3107.28
P290	0.563543	6.05171	182.745	68.7654	4.8019	3078.32
P299	3.02833	4.12982	130.99	68.7431	3.34932	3093.2
P304	1.67594	5.76586	153.84	79.2285	3.79845	3000.77
P312	1.35961	5.2621	151.276	66.5428	4.82332	2858.5
P317	2.64787	5.55011	146.882	75.5259	3.97212	3046.71
P330	2.70331	5.49232	169.658	64.2456	3.79953	2886.59
P335	1.73692	4.65836	158.95	68.1629	1.80353	2955.25
P342	2.86896	4.26959	172.71	61.8163	4.10817	2834.59
P344	4.67047	4.81685	181.061	54.2294	2.01804	2861.11
P351	1.62816	5.27697	173.125	70.154	4.11376	2569.12
P352	1.5174	5.34159	143.364	69.0455	5.14094	2814.52
P353	-0.0436956	5.73381	130.068	75.2756	5.18368	2626.58
P354	2.31922	5.10793	177.395	75.3585	3.31805	2742.51
P357	1.84422	6.01458	158.321	76.138	3.25711	2958.22
P360	1.77774	5.63652	159.373	76.536	3.10354	2992.31
P362	1.39416	5.55642	125.802	81.7408	2.50937	3138.34
P383	1.85165	5.21954	151.665	68.4293	3.70095	2369.23
P385	5.14158	6.04058	157.758	76.3411	1.54021	3236.15
P396	2.32986	4.34057	161.564	66.4147	3.32863	2823.28
P409	2.49082	5.12202	161.615	67.6496	4.29241	2672.84
P410	2.50282	3.32536	178.004	53.6919	1.02561	3166.71
P415	5.8484	5.39951	159.14	66.2316	1.76554	2941.02
P420	2.64729	4.94833	155.614	73.4521	3.18765	2794.53
P422	2.98131	5.29535	157.411	73.8602	3.00813	2799.7
P481	1.81826	5.7684	176.388	73.9977	2.19264	3179.14
P484	0.515563	6.10566	184.638	80.5406	5.02687	2669.68
S018	1.90722	5.10475	170.79	60.2503	2.31435	3235.68
S028	2.11682	5.38966	163.254	71.1751	2.85799	2910.64
S036	2.15529	4.77071	148.345	77.6913	3.35722	2987.17
S046	0.821814	5.50151	151.405	70.9141	3.44891	3033.56
S050	2.86383	4.82295	173.583	75.1666	4.12563	2662.36
S058	0.328469	4.90732	146.716	73.525	4.37154	2729.94
S064	1.64439	5.54507	142.473	68.589	3.63776	2685.56
S066	1.65933	5.0368	159.726	69.9436	3.57748	2854.11
S067	1.45038	5.26707	147.752	74.6461	2.93274	2972.11
S072	-0.833123	5.58658	161.817	78.9448	3.50814	2915.09
SATU.004	1.64895	4.99391	126.875	74.8444	1.74676	3175.67
SATU.008	4.30003	4.17497	117.365	73.4224	0.261522	3277.86
SATU.013	7.64481	4.53671	131.567	73.5997	1.12786	3484.61
SATU.014	1.33673	3.79757	117.271	70.0922	0.615812	3651.61
SATU.106	2.34022	4.80952	122.153	76.8717	0.658643	3309.22
SATU.123	5.87072	3.99045	88.5332	70.183	0.155915	3209.27
SATU.126	3.33329	5.04454	120.393	73.7243	0.905745	3276
SATU.127	0.530574	5.25319	138.183	72.125	2.35848	3322.38
SATU.128	8.49438	3.61963	154.858	71.7617	0.952353	3134.8
SATU.129	1.82764	5.1414	151.49	63.0956	1.90847	3183.52
SATU.130	6.36207	5.3956	146.986	71.341	1.57184	2956.16
SATU.134	0.782037	3.65276	137.9	81.6203	1.36131	2850.36
SATU.135	2.85325	6.07224	161.941	71.1458	3.34553	3328.21
SATU.137	7.36371	4.04279	147.185	69.8442	0.137017	3429.61
SATU.139	3.30787	7.01583	178.283	76.3653	3.03585	3205.92
SATU.140	6.51011	4.00332	115.813	78.1812	0.433878	3159.94
SATU.141	7.10581	4.14906	137.908	66.9286	0.65697	2776.85
SATU.149	8.01942	2.38991	117.983	79.5141	0.230264	3172.68
SATU.152	10.0229	3.62692	132.336	64.6311	1.38265	3316.67
SATU.161	5.52353	2.96933	110.951	73.1673	0.630039	2843.9
SATU.162	1.38577	4.53096	113.086	73.7386	1.48142	2866.53
SATU.163	7.31587	4.95305	169.581	63.8603	0.972546	3378.47
SATU.165	6.78678	1.55234	104.335	72.6644	-0.192815	3281.63
SATU.167	6.56097	2.89607	117.912	73.4353	0.440808	3136.31
SATU.169	2.14302	4.72913	128.293	69.0973	2.19729	3743.68
SATU.176	2.80628	6.00019	139.3	70.7582	2.60348	2996.61
SATU.182	8.5608	3.65087	158.384	73.3813	-0.301342	3118.65
SATU.183	4.86792	3.63211	157.898	62.187	1.13604	3416.22
SATU.186	5.29983	4.70897	121.796	78.7927	0.666278	3241.28
SATU.196	2.80507	4.08714	112.291	76.6257	1.4541	2925.07
SATU.212	5.80473	4.30179	148.734	68.3665	0.876779	3636.61
SATU.218	7.78339	2.94863	92.0661	72.9581	0.305446	3173.66
SATU.224	6.31923	4.54175	142.431	73.9513	0.801174	3263.76
SATU.228	3.28216	3.47028	109.618	77.3029	0.26677	2964.89
SATU.235	11.0934	4.48416	139.237	63.955	0.639986	3050
SATU.237	5.52579	5.12049	145.718	70.2471	1.11662	3306.74
SATU.240	5.84262	4.29163	125.119	68.1403	2.3885	2997.51
SATU.243	2.77964	5.27746	151.618	69.2091	1.68618	3475.61
SATU.245	-0.038587	4.96723	101.099	75.0011	0.645177	3159.66
SATU.248	1.53719	4.71732	114.903	74.4973	0.940484	3168.2
SATU.256	2.57198	5.42863	150.161	72.6933	3.44734	3183.57
SATU.257	0.49015	3.53849	97.874	79.6081	0.753477	2868.42
SATU.258	5.71074	3.93552	122.989	71.5012	0.493169	3279.4
SATU.263	3.33828	4.70664	104.594	74.8702	1.3916	3041.84
SATU.264	4.4629	4.3176	152.311	74.9599	1.33834	3453.82
SATU.268	4.17615	3.91481	139.097	69.8367	1.40133	3140.61
SATU.269	9.69578	3.68246	114.771	74.9947	0.357124	2935.57
SATU.270	1.65405	5.81353	162.328	69.6002	3.74183	3099.99
SATU.277	6.35112	3.63182	109.342	64.5308	0.706026	3320.87
SATU.278	3.16712	5.31205	147.345	78.1371	2.11376	3358.62
SATU.281	3.48715	5.27106	129.563	71.3088	1.44011	3167.3
SATU.282	1.51583	3.81923	127.303	65.31	1.61961	3295.02
SATU.290	3.31747	4.17343	131.998	76.2109	1.10843	3505.28
STGA.101	3.34767	5.58876	121.6	79.1608	0.582396	3462.4
STGA.104	0.602349	5.9435	102.684	78.4993	0.546668	3365.89
STGA.108	0.525048	5.95568	119.988	76.5355	0.403984	3894.62
STGA.115	2.80047	6.34826	139.979	76.9157	0.684874	3373.56
STGA.136	4.68848	5.34311	119.607	74.3603	0.457544	3118.77
STGA.150	2.89162	6.15848	138.552	79.2643	0.265666	3504.45
STGA.151	3.51591	6.89931	121.675	79.7972	0.695337	3565.95
STGA.158	4.48545	5.71829	131.138	77.3678	0.492398	3202.35
STGA.161	3.15093	7.3058	137.783	76.4506	1.58496	3267.23
STGA.168	3.24931	6.57563	125.939	79.4572	0.403251	3305.05
STGA.172	2.66185	7.3541	136.238	78.4764	1.19401	3483.84
STGA.173	2.67609	5.49401	122.94	77.6268	0.833528	3441.62
STGA.182	3.62328	6.97215	110.069	79.9106	0.718641	3556.37
STGA.303	3.9591	7.31147	127.705	79.8343	0.869972	3474.25
STRE.109	2.81236	6.62558	151.665	73.4499	1.17324	3208.29
STRE.127	4.05009	6.56786	148.905	76.4087	1.01972	3028.77
STRE.130	4.33345	5.9282	139.842	78.3619	1.52871	3036.72
STRE.138	1.70134	5.14832	149.382	75.6523	0.5104	3268.12
STRE.146	4.51174	7.0402	143.328	73.4566	2.14124	3128.26
STRE.155	4.17527	4.94027	129.902	78.9218	0.336173	3413.27
STRE.156	0.555214	5.8105	132.28	76.8806	0.90971	3362.61
STRE.158	1.83337	5.36401	140.654	81.6441	0.91731	3200.72
STRE.163	2.13811	5.66329	138.869	69.0691	1.42094	3065.71
STRE.165	2.67082	6.28774	150.433	75.0136	0.38944	3351.93
STRE.167	1.83511	5.93262	146.02	77.7221	0.518685	3232.88
STRE.172	2.27587	6.11873	138.323	81.0729	1.65084	2946.75
STRE.174	2.53533	6.29871	137.67	77.4434	0.484789	3269.17
STRE.176	1.7603	5.95126	146.067	74.0517	1.18975	3426
STRE.190	4.4806	5.68923	128.133	73.2703	0.333358	3347.41
STRE.197	-0.511856	5.0036	151.73	79.7742	1.66822	3292.09
STRE.201	-0.865165	4.65071	141.18	79.3245	1.16781	3128.93
STRE.205	3.3668	6.2909	135.373	80.2547	1.53984	3209.16
STRE.208	2.8033	4.79731	139.062	75.9295	0.449148	3192.12
STRE.211	5.37636	3.85188	131.035	60.5491	0.334701	3446.25
STRE.212	9.62314	4.12727	107.074	76.4398	-0.245091	2909.27
STRE.213	6.0936	6.23729	125.598	77.3797	0.511998	3206.53
STRE.214	3.85383	5.98469	165.078	77.5302	0.483151	3174.59
STRE.215	1.91944	6.62445	162.317	79.1077	0.940679	3333.26
STRE.216	4.3645	5.57754	143.673	75.8516	0.841227	3520.21
STRE.219	7.15695	5.33209	147.069	73.5768	0.583254	3731.15
STRE.303	3.70677	7.04401	147.953	79.076	2.00137	3236.18
STRE.305	3.20323	7.67563	152.417	78.0804	0.386587	3081.73
STRE.306	-0.198941	4.20443	111.299	75.4922	0.466766	3185.88
STRE.307	3.62594	6.41376	150.908	75.4241	0.969988	3254.93
VD03	1.97303	5.35038	146.316	70.5168	3.50309	2911.01
WALL.001	3.56159	4.62978	131.3	76.2822	1.75737	3499.21
WALL.006	3.94168	5.47495	140.592	75.5532	0.622904	3354.54
WALL.010	6.97153	5.55357	128.579	69.0168	0.7062	3451.86
WALL.012	5.84674	5.05976	141.819	72.3241	0.540257	3342.36
WALL.014	2.52796	4.0707	148.142	77.0509	0.75125	3210.97
WALL.104	10.6951	4.46525	153.182	69.0558	0.344624	3393.03
WALL.105	3.87414	5.72757	126.307	77.6975	0.501936	3574.2
WALL.108	5.29638	6.31955	144.034	72.5008	0.673611	3519.08
WALL.113	2.15369	4.2695	122.414	75.2028	0.602645	3357.48
WALL.122	2.69361	4.31093	123.123	79.0808	0.703316	3390.79
WALL.128	8.46345	5.01722	150.923	70.9972	0.532567	3484.68
WALL.134	3.82646	5.18491	132.718	75.5787	0.58994	3536.03
WALL.143	9.01495	5.96528	133.12	63.9486	0.329874	3447.75
WALL.149	8.96174	5.81923	128.251	64.9661	0.428129	3441.74
WALL.150	7.02988	5.1969	132.844	76.6966	0.218613	3205.15
WALL.151	5.26142	4.02449	132.772	73.9641	0.603286	3282.94
WALL.154	1.42562	5.44702	154.555	78.5895	1.17958	3173.24
WALL.165	3.70221	4.235	144.641	71.6205	0.413408	3501.58
WALL.168	5.41343	5.53104	123.962	75.1058	1.70885	3163.55
WALL.169	9.0903	5.48038	150.43	76.6675	0.145315	3341.04
WALL.172	7.29909	6.87939	152.791	64.293	0.247454	3384.89
WALL.174	2.6324	6.41331	125.071	75.5916	0.511522	3555.51
WALL.175	6.14177	7.16076	151.781	71.2747	1.39876	3357.34
WALL.178	5.61932	6.25495	151.938	63.0769	0.945602	3277.47
WALL.179	6.66463	6.61156	144.758	66.8486	0.728547	3320.1
WALL.184	5.9934	6.12992	128.088	70.7286	0.68986	3944.2
WALL.185	6.5432	4.78417	146.637	77.1109	0.281347	3304.71
WALL.189	5.64852	4.22805	153.438	69.8988	0.721888	3566.99
WALL.191	5.62902	5.31416	154.226	67.9596	0.810543	3248.17
WALL.195	9.82148	6.54077	162.385	66.4232	1.10208	3313.93
WALL.197	1.84511	5.83676	115.237	78.8176	0.308973	3505.62
WALL.207	4.31477	5.88076	136.149	78.3965	1.13271	3441.06
WALL.209	1.16703	5.77287	145.618	73.2545	1.18902	3605.76
WALL.213	6.64455	3.88423	122.201	74.9324	0.635765	3097.65
WALL.215	5.39548	4.76359	146.606	78.7185	0.34101	3313.23
WALL.216	9.64828	4.05105	154.595	66.8355	0.0281497	3297.75
WALL.218	4.7843	5.36563	142.897	77.1984	0.307776	3332.37
WALL.219	4.32282	6.37919	142.545	81.8613	1.34519	3423.59
WALL.222	4.76578	3.57722	122.685	73.824	-0.0992912	2962.77
WALL.225	4.65777	4.93983	138.791	53.1165	0.474242	3535.57
WALL.228	5.4826	4.40924	143.796	76.2872	0.631103	3088.52
WALL.251	6.6435	5.69908	162.015	70.0694	1.29304	3520.34
WALL.254	3.68878	6.38379	133.602	76.024	0.781352	3414.28
WALL.257	4.69803	4.89681	133.502	78.8306	0.630923	3192.13
WALL.260	10.6667	4.88361	144.352	68.9889	0.24141	3257.12
WALL.269	3.54456	6.14172	147.109	77.0981	1.3886	3296
WALL.270	6.49127	3.61964	113.865	77.0711	0.239389	3151.96
WALL.271	2.19046	5.6758	144.961	74.366	0.561655	3234.11
WALL.277	4.35293	6.17754	121.777	72.4406	1.41448	3595.79
WALL.285	4.21099	6.54913	113.583	76.283	1.41114	3207.86
WALL.293	9.89171	5.03116	127.767	69.8518	0.719628	3239.35
WALL.296	5.56072	6.74572	138.371	73.7041	1.03833	3423.25
WALL.297	2.71454	6.14485	135.95	71.8171	1.3747	3215.14
WALL.301	5.82005	5.95985	159.82	45.2533	0.936605	3199.88
WALL.303	6.68998	6.16995	144.791	66.044	0.932636	3154.74
WALL.309	9.1576	5.29307	130.982	74.5739	0.137228	3378.14
WALL.316	7.04254	7.16471	169.842	67.8938	1.29885	3135.55
WALL.317	3.40551	6.50429	148.874	73.3388	1.58609	3232.25
WALL.318	5.51956	3.92219	140.53	73.9012	0.374802	3455.41

## Sheet: BLUEs_EWE
Name_pretty	ASI_EWE	EV_EWE	Final_PH_EWE	GDM_EWE	GY_EWE	P_conc_EWE
CAMP.001	0.534961	7.06865	159.891	85.3938	0.416436	4249.94
CAMP.004	0.419928	7.02816	126.321	86.4555	0.610712	3520.82
CAMP.104	2.00433	6.54679	151.372	70.6391	1.88375	3743.08
CAMP.107	1.02222	6.11012	146.657	80.3795	1.08939	3777.1
CAMP.117	0.00911962	7.02066	142.862	85.5484	1.20505	3910.73
CAMP.130	1.53984	6.95655	148.095	83.3366	0.831571	3305.75
CAMP.137	4.99579	7.80396	166.802	80.1912	1.26059	4077.82
CAMP.141	-0.499324	7.07705	179.748	83.071	0.409	2991.81
CAMP.301	0.508971	6.97898	162.823	84.9563	0.235395	3546.09
CAMP.303	1.4869	6.59402	139.446	82.5974	0.451859	3937.69
CAMP.306	-0.0263469	5.44691	140.157	77.6085	0.943269	3379.64
D102	-0.481752	7.00121	149.206	79.8909	1.16016	3261.06
D105	3.52262	7.47617	160.716	72.5415	1.72595	2889.17
D107	0.447067	7.94437	142.742	70.8151	2.23739	3420.44
D142	-1.04008	7.98593	198.856	75.0453	2.24027	3334.78
D146	3.00465	7.34489	163.028	80.5448	1.67401	3767.9
D150	1.50422	7.83998	178.436	79.4468	2.49322	3494.67
D152	0.521695	6.65306	158.23	84.7957	2.4164	3470.75
D167	-0.504672	7.36987	174.897	83.8054	3.49131	3533.3
D171	0.53624	8.02926	154.603	81.1451	2.23131	3121.45
EP1	5.03118	7.11542	143.039	73.782	1.2344	4322.94
F005	1.96491	8.43904	184.31	79.5334	3.93292	3050.98
F012	-0.500564	7.42929	163.097	86.2523	1.27765	3119.62
F023	0.499669	8.32283	177.604	81.3076	3.5309	3337.78
F030	0.00396521	7.91223	169.404	78.0442	4.50445	3061.63
F034	4.45571	7.9532	188.438	83.3953	1.69149	3581.17
F037	-0.00889416	7.05049	188.847	83.0932	4.32718	3383.97
F040	-1.00491	7.75606	163.602	85.9972	3.09801	3088.71
F043	-0.000792049	7.97154	182.145	82.2722	3.54798	3211.13
F045	0.504141	7.33769	174.85	83.648	2.72556	3190.04
F047	-0.463684	7.40411	179.349	79.5197	2.58297	3282.41
F048	0.992337	7.81916	159.568	86.4549	2.7693	3187.26
F050	0.00900737	7.00613	177.615	83.4692	2.16494	3262.84
F052	0.526438	7.23477	173.493	81.4317	3.05677	3407.49
F054	-0.0135774	7.97976	179.469	86.7946	1.08478	3255.02
F055	-2.49488	8.14377	180.565	76.84	3.4585	3287.98
F056	1.45087	7.01243	146.413	78.4377	2.31606	3889.92
F060	1.49076	7.60428	162.431	86.3642	3.02654	2973.23
F062	2.54468	7.62839	165.464	82.5179	1.5258	3164.98
F066	0.486783	7.36889	164.401	84.7865	2.59258	3015
F077	-0.00475791	7.60779	153.739	83.2946	2.85077	3226.69
F082	0.00840278	7.84371	184.379	81.3934	3.01315	3217.02
F084	-2.03131	8.08638	177.506	84.2068	2.87506	3345.65
F087	2.98681	7.94388	171.962	85.5678	1.88836	3051.72
F088	0.517504	8.53896	196.94	81.5022	3.31063	3012.59
F090	1.0052	7.08939	177.016	83.6702	2.44057	3399.43
F094	-0.487302	7.45474	165.571	80.9481	2.77397	3255.17
F096	0.544734	7.59536	189.319	76.3818	3.88802	3139.91
F099	1.43361	7.86004	193.242	73.3405	4.03736	3184.01
F101	0.0704832	7.46419	163.167	84.5749	3.16982	3214.72
F103	0.451903	7.87592	166.651	82.7117	3.04542	3491.61
F104	-0.513723	6.17564	163.732	76.3158	2.77796	3236.07
F105	-0.500542	8.3174	159.831	74.9486	2.50043	3132.95
F106	-0.0480605	7.17253	187.095	74.6109	3.82719	3371.22
F108	-0.495669	6.97316	113.242	81.969	2.05607	3058.66
F109	-0.472814	7.44315	174.675	78.2228	4.58852	2783.52
F110	-0.454993	7.0359	159.93	85.3908	2.77818	3771.12
F117	5.54001	7.77193	171.458	77.912	0.370683	3564.97
F121	0.942653	8.09364	177.499	82.3392	2.82988	3352.09
F124	-0.481942	7.48431	157.343	85.6121	3.21914	3201.88
F134	1.5266	7.89046	174.757	84.4613	2.45226	3481.29
F136	0.522031	7.81005	181.127	79.4451	2.90194	3319.42
F137	1.02708	7.86889	171.957	79.7559	1.77076	3261.08
F138	0.481666	7.84479	144.372	81.2871	2.42416	3213.35
F139.STRE	0.491144	7.69297	149.237	81.9454	1.99985	2950.55
F142	-0.0264835	7.94329	172.34	82.1546	3.03685	3183.32
F145	0.0131322	8.00917	172.404	80.7532	3.8414	3346.55
F147	0.0092798	7.91597	181.005	81.5067	3.05925	3319.48
F148	0.0319855	8.32595	189.106	78.1263	1.42634	3526.53
F151	-0.00893225	7.80742	155.137	81.7831	3.0744	3001.98
F154	0.513415	7.89455	175.674	87.0714	3.80133	3346.25
F159	0.94678	8.01826	187.475	79.8758	2.49037	3225.56
F160	0.0135263	7.9923	165.116	81.0749	2.1803	3272.84
F161	-0.526788	6.46815	176.512	73.8228	2.78014	2978.55
F162	0.499057	6.60663	168.476	76.7981	2.40176	3022.11
F169	0.531402	8.5746	173.861	85.0034	3.00904	3404.35
F173	-0.0265116	8.23419	187.303	78.0148	3.53715	3420.82
F179	3.00426	7.93381	201.209	83.5817	2.75005	2882.22
F182	1.49115	8.05992	187.18	81.2809	2.69912	3757.7
F186	0.0259676	7.80928	165.536	82.0281	1.6167	3354.49
F195	0.00456428	8.12111	195.025	82.7701	3.41141	3015.32
F198	-0.0529451	6.96023	152.715	84.4892	2.92225	2969.48
F201	0.504638	7.11746	191.254	75.2817	3.40669	3614.15
F207	0.47816	7.39142	183.328	77.9153	3.17263	3246.5
F217	-1.00901	7.55968	169.49	82.7537	1.95239	3481.6
F240	-0.981981	6.65781	174.702	75.4859	2.4753	3087.61
F242	-0.0307621	7.56395	212.513	72.7317	1.45502	2904.08
F252	2.50437	7.37959	170.636	75.8652	1.91489	3472.25
F259	-0.527184	7.05416	164.784	85.176	1.79326	3441.97
F260	-0.946702	7.0846	179.523	84.2873	3.2329	3063.47
F262	1.49218	7.99599	170.612	75.0057	4.00585	3246.74
F266	2.01746	7.16496	173.216	65.221	1.46721	3295.6
FV2	-0.504928	6.94015	153.575	79.4129	1.02576	3226.72
FV7	0.428877	6.92999	121.822	83.7809	1.67259	3225.91
GELB.104	0.995242	7.76702	169.542	83.8937	2.30513	3008.19
GELB.106	3.47313	8.11718	177.417	81.8377	0.155982	3456.18
GELB.109	2.48243	6.89861	140.769	85.7988	0.106051	3100.44
GELB.110	2.96386	7.10435	126.582	86.0654	0.508626	3443.13
GELB.121	0.973693	8.14565	223.591	81.7909	3.14266	3098.73
GELB.122	0.543567	7.23278	171.942	78.914	1.42628	3078.13
GELB.129	3.00465	7.89093	200.967	82.8609	0.310291	3022.92
GELB.130	-0.0315504	8.1608	162.843	86.6451	1.96228	3387.78
GELB.133	1.00445	7.82346	184.371	81.3937	1.06553	3043.52
GELB.135	2.46043	8.01179	152.056	81.086	0.661546	3365.04
GELB.138	-1.97337	5.71003	142.98	79.0698	0.215767	3221.9
GELB.143	-0.964379	7.47965	183.911	76.7725	0.680471	3584.67
GELB.148	0.486866	8.02283	203.7	80.5781	1.93481	3367.26
GELB.149	4.48235	7.11021	166.819	85.5378	0.572327	3455.42
GELB.155	3.99119	6.89961	149.51	76.6336	0.312221	3438.48
GELB.157	1.50472	6.97313	186.696	74.5908	2.43603	3159.12
GELB.158	7.01321	8.24553	191.49	80.4814	0.957565	3365.88
GELB.162	2.46837	8.35808	169.418	76.9369	0.681244	3129.08
GELB.164	2.9959	8.24688	167.837	81.4449	0.755774	3513.27
GELB.166	-0.00865423	7.51534	174.358	83.1395	0.211806	3104.71
GELB.A102	-3.95622	9.21418	213.426	81.1128	1.83355	2885.99
GELB.A106	0.508189	8.04143	184.563	84.5551	1.17452	3421.62
GELB.A119	0.500429	6.39323	178.436	81.7747	0.239784	3633.77
GELB.A121	1.99968	7.91965	188.945	78.8552	0.191239	3343.07
GELB.A122	1.01799	7.95439	158.035	83.6135	0.801019	3787.99
GELB.A125	2.53501	7.08545	134.1	84.4629	1.10211	3226.79
GELB.A127	8.49991	8.39253	199.736	82.2118	0.0573151	3273.4
GELB.A203	-1.51786	7.46134	188.413	80.9988	0.578021	3136.52
GELB.A213	5.00397	7.25845	190.331	79.9245	0.873357	3226.08
GELB.A216	1.50429	7.27874	174.35	85.0233	0.999804	3328.35
GELB.A217	0.045321	8.35895	200.261	82.263	1.35319	3479.83
GELB.A219	1.96	7.56407	179.723	76.1274	1.47331	3333.2
GELB.A220	0.98273	7.56087	182.821	82.8589	0.195693	3104.35
L007	0.460024	7.1984	182.222	69.0642	2.90304	2933.01
L012	1.48221	6.97748	199.67	76.09	4.51035	2983.33
L016	2.03587	8.19518	149.24	74.7984	1.39505	3209.77
L023	3.02239	6.41487	176.521	80.7955	2.18149	3399.46
L035	1.4864	6.47256	159.808	81.985	2.33505	2860.82
L037	0.0216654	6.95782	174.725	81.6594	3.12154	3238.79
L041	-0.505079	7.10068	205.803	81.6896	3.33229	2913.47
L043	-2.04453	7.91555	193.295	82.1476	4.52151	3272.46
L045	2.00917	7.60154	168.61	73.8552	2.73809	2879.73
L046	0.0273106	6.90724	175.21	82.6211	3.482	3089.25
L047	-0.0402111	7.89594	190.208	81.3282	4.58627	2582.83
L050	-2.97309	6.39231	163.91	74.5655	3.74781	2964.89
L051	-0.990753	7.32877	173.865	82.8981	3.40525	2859.04
L054	0.0309141	6.06628	173.05	83.4119	1.44894	3236.91
L056	1.49544	8.54714	177.803	84.1327	3.71797	3045.8
L059	1.0397	7.60183	179.873	84.2629	2.96901	2734.68
L060	-0.000239105	7.32551	194.664	81.9053	2.59788	3057.78
P001	2.0489	6.54775	209.333	76.1962	5.05027	2930.13
P006	0.437533	7.99286	197.803	82.2783	2.92253	2671.04
P024	1.50932	6.91527	197.563	73.1868	5.25926	3250.35
P033	0.469167	7.03378	183.779	81.9666	5.00795	3135.54
P034	3.00452	6.53725	213.974	79.575	3.01236	3071.33
P040	0.486699	5.40497	180.373	73.4793	2.54721	2784.6
P042	-0.0134525	7.07597	183.192	77.0115	4.44954	3283.98
P048	2.92	6.0458	163.202	80.7504	2.2455	3023.61
P053	0.495858	6.87624	194.089	79.7661	4.15416	2590.86
P060	-3.01386	7.02148	143.266	81.7003	2.4854	2911.23
P063	1.4598	7.16361	186.477	67.7557	5.7326	2979.79
P065	-0.530866	7.30469	207.221	74.7242	4.93447	3163.72
P066	-1.01751	6.93898	188.292	81.3751	3.56185	2849.58
P072	0.00440316	7.46251	180.416	79.4007	1.78133	2932.85
P074	2.46923	6.40323	183.805	80.1883	3.78797	3325.24
P075	0.465311	6.90024	182.557	80.0721	2.91616	3095.14
P080	0.0131011	6.9863	198.568	77.3657	4.45532	3239.23
P081	-0.469203	6.97888	187.945	77.9324	2.34495	3588.74
P083	4.00838	6.26452	164.142	68.0022	2.85681	2660.04
P085	1.01772	7.01132	169.54	75.3161	1.92051	3502.86
P087	0.977662	5.86832	182.653	79.793	4.92201	2559.84
P092	-0.499653	5.49255	167.5	74.5975	1.78987	3183.08
P096	0.530287	6.10298	150.105	78.5868	3.22856	2818.32
P102	-4.02706	7.0784	168.83	75.4746	3.03448	3216.35
P104	-0.451242	5.97131	180.225	85.5943	2.22719	3107.83
P105	-0.996218	6.73725	166.089	82.7469	3.38386	3026.44
P106	0.517778	6.60249	174.796	73.5495	4.22338	2814.48
P108	-1.00461	6.95607	165.705	77.5667	3.60776	3181.87
P110	-0.509031	6.48332	167.09	85.1756	2.4396	3263.91
P115	1.00013	7.47432	184.789	79.2022	2.48573	3212.89
P120	6.02292	6.21433	185.727	71.6963	1.3953	3094.85
P122	0.486621	6.67416	189.491	75.5877	0.888648	2910.59
P127	0.535802	6.06225	184.123	76.5588	2.22658	2830.76
P129	0.474037	6.03698	162.263	81.5412	2.17178	3003.67
P130	-0.496037	6.20222	190.195	79.1888	3.98241	2760.78
P133	-0.981476	7.02511	180.4	82.0854	3.5564	3293.91
P135	-0.00907905	8.06635	195.142	81.8207	3.15417	3310.25
P136	0.4952	6.537	184.961	78.0969	6.36973	2827.77
P140	-1.44607	7.02695	203.484	76.17	3.78954	3219.12
P150	1.47811	6.04098	186.005	73.468	5.08471	2773.3
P154	-1.53135	6.93167	174.151	80.6973	4.00194	2861.04
P159	0.00396598	6.47371	176.685	75.231	3.05424	3516.63
P165	-0.0126294	6.78703	168.13	78.5192	2.88501	3151.68
P167	-0.482448	6.91429	220.041	62.1142	4.5066	2793.57
P182	0.49999	7.06713	175.059	78.1864	5.9371	2704.1
P184	-0.00432866	7.08218	133.103	72.8281	3.35165	2971.38
P188	0.495833	7.09099	172.251	76.6085	3.94274	3115.74
P194	-0.0269369	6.90057	167.969	78.7319	4.5411	3042.06
P206	-0.5044	7.06731	161.655	84.4088	2.63105	3206.38
P209	-1.46435	7.13154	161.354	79.5224	3.77256	2676.69
P212	0.0221797	7.03055	187.626	82.97	2.69296	3140.94
P213	5.04893	6.79025	135.629	81.3117	1.09665	2940.11
P219	0.986613	6.91294	187.462	72.9849	3.57708	2985.73
P223	-0.522066	6.47462	168.148	74.3034	3.69365	3262.95
P239	0.473618	7.7801	201.351	80.9284	3.71379	3023.41
P245	0.548619	7.06131	187.025	79.5095	5.7948	2846.6
P250	-1.00869	7.13126	181.592	74.468	1.99822	3222.33
P261	-0.0450302	8.02223	187.314	71.386	2.93986	3293.57
P271	0.00446948	7.16208	198.445	73.9777	4.55592	2550.73
P272	0.51746	5.99564	199.639	67.4245	2.75407	2860.32
P275	0.477662	6.74247	225.72	73.5677	4.98277	2726.14
P284	0.468298	7.16745	217.178	68.476	4.23249	2724.37
P289	-0.0173377	6.96075	210.184	72.2355	4.72727	2904.22
P290	-0.473058	7.80406	228.082	76.7689	5.39132	3047.91
P299	1.03084	6.23442	162.66	74.2411	4.58888	3042.73
P304	0.0219425	7.8235	187.151	83.9353	4.04217	3064.92
P312	-0.487336	6.85774	175.546	76.2725	5.41676	2723.36
P317	2.01727	7.19003	175.135	82.0974	4.65452	3053.09
P330	0.504676	6.9591	187.536	71.7823		2981.45
P335	0.990759	6.63463	180.675	72.1848		3002.34
P342	0.021612	5.99624	201.063	66.414	5.14225	2776.9
P344	0.995671	6.36088	204.015	64.364	3.22262	2865.62
P351	-0.522384	6.96971	187.428	82.3435	5.69821	2571.08
P352	1.0452	7.10676	174.911	74.0556	5.75499	2821.51
P353	-1.00436	6.94465	154.582	79.6999	5.74852	2510.08
P354	2.55318	6.51324	209.129	78.2228	4.3808	2701.18
P357	-0.0130939	7.6459	186.821	82.0185	4.30565	2755.82
P360	-2.03064	7.32608	177.07	85.1183	3.27006	3206.34
P362	-0.512621	7.2239	159.383	85.7415	3.05911	3161.17
P383	-0.977188	7.44317	166.144	74.6439	3.96084	2317.86
P385	3.5169	7.99187	174.179	81.738	1.31217	3302.31
P396	0.540127	6.56394	181.799	70.0587	3.21916	3140.96
P409	-0.0136215	6.95545	185.221	73.9056	6.02272	2815.97
P410	2.50334	4.57281	199.858	59.7672	1.53054	3396.4
P415	3.48623	6.66128	183.335	75.0301	2.73633	3261.98
P420	-0.481787	7.1551	178.059		3.9169	3026.12
P422	-0.0224201	7.00205	189.802	82.4056	3.25121	2904.13
P481	-0.504075	7.49642	207.524	82.3343	3.10197	3241.61
P484	-0.557624	7.53126	217.181	85.3326	6.24041	2743.04
S018	-0.464006	6.04054	194.731	67.7134	3.06542	3228.89
S028	-0.0179385	6.49174	180.353	75.8371	4.01221	2999.78
S036	0.464232	6.34407	177.438	83.242	3.98688	3177.04
S046	-1.02211	7.01368	174.969	72.8951	3.95552	3135.47
S050	2.48647	6.16714	204.598	81.1192	4.54007	2822.95
S058	0.00421077	6.94635	175.62	77.7115	6.05604	2734.87
S064	-0.504044	7.01262	162.767	77.0823	5.08701	2798.04
S066	0.991893	7.00479	197.38	73.0314	5.40082	2906.88
S067	-0.0265565	7.07289	169.639	78.7818	4.74174	2935.3
S072	-1.00059	6.9739	190.477	84.9233	4.18422	2844.62
SATU.004	1.51231	6.99585	153.994	75.2293	1.55211	3276.69
SATU.008	2.95989	6.19353	133.838	77.2747	0.35185	3210.69
SATU.013	3.96876	6.91643	139.683	81.9349	0.653511	3700.27
SATU.014	0.0275454	5.96976	137.184	72.3603	0.398477	3882.85
SATU.106	1.03118	6.10251	138.284	83.0757	0.457635	3650.65
SATU.123	4.53489	6.15589	91.9197	76.7508	0.0501996	3448.51
SATU.126	1.98626	6.52401	134.66	78.1469	0.548085	3307.02
SATU.127	0.0356489	6.42992	149.245	79.4639	1.76556	3299.97
SATU.128	3.99063	5.86148	174.09	73.41	1.65323	3234.29
SATU.129	0.521633	6.5633	171.046	64.9048	2.37425	3188.74
SATU.130	4.51382	6.94197	166.417	76.2513	1.22387	2832.34
SATU.134	-0.0225698	5.7946	150.377	85.6828	2.03915	2844.06
SATU.135	0.995523	7.00843	177.912	74.5076	3.34263	3425.14
SATU.137	5.004	6.19654	181.879	68.5934	0.0245631	3453.13
SATU.139	1.5094	8.57577	196.183	81.3441	2.75515	3223.54
SATU.140	4.46409	5.42875	138.584	81.2325	0.503797	3297.36
SATU.141	4.0533	5.45346	161.155	69.7551	0.887304	2599.95
SATU.149	4.99587	3.62544	114.896	82.2056	0.183113	3250.44
SATU.152	8.99914	5.81867	147.384	70.0671	1.04622	3498.43
SATU.161	2.52206	3.97542	114.367	80.5976	0.173662	2802.62
SATU.162	0.0226981	6.48095	145.689	78.172	1.61593	3046.99
SATU.163	5.50872	6.32084	187.727	68.1784	0.903688	3754.8
SATU.165	6.9688	1.96919	113.531	77.2299	0.14578	3220.21
SATU.167	4.99571	3.3862	141.347	77.7696	0.734225	2972.13
SATU.169	0.999646	5.99442	143.87	71.2886	2.40571	3967.79
SATU.176	1.00818	6.80341	148.914	76.2738	1.42941	3162.62
SATU.182	8.01291	4.00451	171.114	79.3959	0.0372598	3269.27
SATU.183	5.02215	5.55789	175.895	67.1976	0.864003	3372.67
SATU.186	3.4642	6.8507	138.275	83.7473	0.423558	3457.54
SATU.196	2.01722	6.19636	119.319	79.9512	1.33524	2962.69
SATU.212	-0.517176	6.62226	173.147	73.3308	1.35102	3702
SATU.218	8.98194	3.72372	99.0002	78.8802	0.121741	3090.85
SATU.224	5.00401	6.69999	153.871	81.5043	0.267326	3291.35
SATU.228	1.00385	2.88763	105.455	81.2606	0.123922	3053.77
SATU.235	6.47738	6.00551	161.56	64.6862	0.956588	3256.01
SATU.237	3.98611	5.99884	160.567	74.6272	1.05043	3421.43
SATU.240	3.00481	6.01258	134.964	74.459	2.71832	3089.02
SATU.243	1.99167	6.34947	173.018	71.7658	1.98694	3544.5
SATU.245	0.00834929	6.94353	114.616	80.6392	0.850057	3342.61
SATU.248	-0.491508	6.03884	128.494	79.185	0.623536	3361.8
SATU.256	1.0135	6.86665	167.722	77.5162	3.76254	3069.59
SATU.257	0.000436847	5.44596	115.008	81.7626	1.0656	2802.56
SATU.258	0.000224612	6.54817	140.351	79.1244	0.889981	3242.43
SATU.263	1.50413	5.64321	118.097	78.712	1.83598	3089.25
SATU.264	2.49683	5.94415	168.577	80.4541	1.54193	3461.31
SATU.268	1.01243	6.07148	162.782	73.6878	1.59107	3270.63
SATU.269	6.00413	4.55682	139.225	79.4774	0.449853	2918.44
SATU.270	0.000678958	7.39052	178.688	74.4836	3.13086	3161.04
SATU.277	3.0044	6.45442	138.716	70.859	1.7593	3515.4
SATU.278	1.03071	7.06483	144.657	85.6017	1.02648	3360.68
SATU.281	-0.0131738	6.96294	154.795	74.9101	1.3051	3336.43
SATU.282	-0.0342949	6.37368	142.16	67.3909	1.72781	3211.44
SATU.290	0.0182197	6.32208	145.366	84.3545	1.79698	3794.39
STGA.101	2.04457	7.36948	138.492	86.1188	0.91327	3649.28
STGA.104	-0.00877803	7.71365	116.179	82.9578	0.537097	3597.9
STGA.108	-0.509046	7.42592	143.459	81.7513	0.877156	4237.86
STGA.115	1.97778	8.14169	164.179	80.8914	0.980859	3568.53
STGA.136	3.49127	7.15578	137.917	78.0385	0.677961	3302.54
STGA.150	3.01774	8.05787	168.274	83.333	0.255336	3439.77
STGA.151	3.97345	8.30928	146.404	83.4571	0.711358	3658.51
STGA.158	1.01853	8.1285	165.414	82.9918	0.871534	3109.36
STGA.161	2.004	8.95165	165.638	79.3031	2.40697	3349.17
STGA.168	3.52215	8.56024	159.808	84.5634	0.502606	3312.5
STGA.172	1.02734	8.07856	172.706	81.953	1.55577	3556.91
STGA.173	-8.00285e-05	6.86973	162.386	82.5823	1.0505	3700.53
STGA.182	2.49091	8.5239	129.963	84.2491	1.06471	3650.26
STGA.303	2.51299	8.182	141.406	84.7922	0.847687	3508.68
STRE.109	1.02146	7.97611	162.389	80.3893	1.99746	3234.84
STRE.127	2.522	8.59193	181.25	81.1459	1.69296	3118.24
STRE.130	3.50437	8.25867	165.768	84.5466	2.63503	2999.14
STRE.138	-6.96019	6.99179	174.336	80.99	0.993469	3158.89
STRE.146	2.46893	8.31675	161.799	79.4523	2.38876	3155.88
STRE.155	3.01298	5.55792	131.041	85.5109	0.465527	3553.53
STRE.156	0.0220741	7.25991	153.481	85.9063	1.3731	3479.89
STRE.158	2.01357	7.051	160.833	85.3229	0.874237	3216.05
STRE.163	-0.0446101	7.09825	170.234	77.3175	1.55593	2940.7
STRE.165	0.508306	7.48017	176.462	82.4096	0.32328	3444.2
STRE.167	-1.02636	7.37152	169.345	81.4126	0.457577	3271.47
STRE.172	0.589096	8.53377	154.141	84.3548	1.06141	3017.95
STRE.174	1.02624	7.94538	155.745	84.1259	0.735813	3366.05
STRE.176	0.482057	8.05852	172.859	83.8214	1.23133	3681.47
STRE.190	4.51266	6.55158	158.68	79.5611	0.273814	3372.35
STRE.197	-2.48702	6.57932	177.273	85.6241	1.33328	3278.57
STRE.201	-3.01334	7.24917	169.106	85.7339	1.83462	3393.17
STRE.205	2.04928	7.06832	158.875	86.7314	1.33074	3199.82
STRE.208	3.49043	6.94929	153.004	84.5961	0.395964	3391.48
STRE.211	2.99119	5.92017	159.684	66.8349	0.582516	3488.68
STRE.212	10.0619	5.76182	100.232	84.1027	-0.0232406	2859.78
STRE.213	8.48615	7.52954	141.458	80.0717	0.144888	3173.13
STRE.214	3.47243	7.99132	180.916	83.9629	0.501712	3584.13
STRE.215	1.50945	8.35894	182.325	84.2977	0.607064	3480.88
STRE.216	3.01833	6.57638	167.694	83.0265	1.45295	3569.23
STRE.219	4.53112	7.13132	176.042	84.3359	1.07725	3820.24
STRE.303	1.5085	8.07843	181.464	84.8476	3.70992	3343.98
STRE.305	3.00559	8.71807	169.55	84.4431	0.200644	3050.89
STRE.306	-4.96536	6.82633	104.985
STRE.307	2.48243	7.53576	167.062	81.0465	1.14783	3444.03
VD03	0.499519	6.98271	167.155	78.9085	4.10518	3308.32
WALL.001	0.553258	6.52966	150.469	85.6655	2.06061	3370.62
WALL.006	4.44273	7.58415	158.76	82.2657	0.792227	3406.59
WALL.010	4.97844	7.98545	144.694	74.9683	0.754021	3640.07
WALL.012	3.99119	6.97003	170.048	80.1851	0.833711	3257.46
WALL.014	1.49533	6.538	172.622	83.1396	0.86456	3114.44
WALL.104	6.48215	6.5071	165.752	77.6973	0.448179	3458.54
WALL.105	2.51345	7.62972	151.845	82.6769	0.728785	3473.07
WALL.108	2.44682	7.96376	169.941	75.4289	0.384511	3589.52
WALL.113	0.0357209	7.19059	138.327	83.1111	1.12199	3383.54
WALL.122	2.52226	6.87459	133.612	84.4078	1.3682	3393.56
WALL.128	3.98241	7.05941	174.173	79.5926	0.373628	3451.57
WALL.134	2.99202	6.93171	146.102	80.6574	0.647749	3552.79
WALL.143	5.99968	7.52572	156.036	70.6868	0.359904	3517.99
WALL.149	3.02792	7.88418	154.893	71.7263	0.913629	3639.15
WALL.150	2.4869	7.26369	155.595	85.5087	0.539809	3142.75
WALL.151	4.97348	5.90199	176.78	77.143	1.12896	3431.04
WALL.154	0.0141221	7.82768	170.642	82.5486	1.48216	3239.29
WALL.165	0.450957	6.36533	171.955	80.3489	0.354562	3664.46
WALL.168	3.02611	7.13788	145.331	78.0019	1.74289	3365.33
WALL.169	7.49525	7.92846	167.232	82.8842	0.0654003	3542.5
WALL.172	6.983	8.79281	184.903	73.8883	0.106487	3405.12
WALL.174	1.46834	8.22027	143.674	79.8265	0.389291	3788.86
WALL.175	3.50451	8.92657	193.756	75.826	2.45169	3127.79
WALL.178	0.00376083	8.00305	169.561	67.6944	1.50358	3561.63
WALL.179	1.51365	7.75357	167.17	75.3729	1.01345	3506.13
WALL.184	1.51338	8.1074	147.296	79.5946	1.00032	4015.92
WALL.185	4.99544	7.0115	175.222	83.6619	0.451306	3477.97
WALL.189	2.98226	6.97176	176.004	76.5855	0.794409	3718.81
WALL.191	0.974025	7.00639	181.4	73.223	0.983116	3415.84
WALL.195	6.99126	8.38594	180.351	71.9522	1.94441	3434.23
WALL.197	-0.00511926	7.77502	127.962	83.984	0.52664	3623.57
WALL.207	3.49945	8.24819	147.633	82.94	1.58929	3520.54
WALL.209	-2.49983	7.48019	165.774	79.8008	1.35542	3876.36
WALL.213	2.01351	5.58145	149.395	77.6282	1.10791	3216.87
WALL.215	3.49995	7.37798	165.046	84.3558	0.332301	3391.82
WALL.216	5.01832	6.46627	179.501	75.8457	0.744188	3474.52
WALL.218	3.46445	7.56422	164.896	83.8021	0.579829	3378.81
WALL.219	3.48229	8.12993	169.26	86.1193	2.09059	3361.2
WALL.222	4.47774	5.52809	146.981	81.5998	0.168032	2984.39
WALL.225	0.50036	7.01686	163.584	63.0193	0.356637	3389.96
WALL.228	2.49079	6.97075	167.968	84.1891	0.782679
WALL.251	2.49587	7.68272	184.265	78.8639	1.13079	3476.5
WALL.254	1.98258	7.94749	152.632	82.644	1.32598	3470.13
WALL.257	2.99103	6.87416	143.994	84.9454	1.004	3229.44
WALL.260	4.98677	7.35251	172.663	79.0131	0.251054	3708.58
WALL.269	2.51805	8.05294	170.439	79.1591	1.83725	3196.5
WALL.270	1.52163	6.02338	128.227	81.7503	0.478305	3258.62
WALL.271	2.00912	7.9981	167.441	78.1432	0.945307	3231.52
WALL.277	2.01294	8.0733	146.092	78.3733	1.64293	3598.29
WALL.285	3.03635	8.03832	136.572	81.2677	1.89357	3281.59
WALL.293	4.4915	6.52518	148.708	77.1619	1.42288	3368.42
WALL.296	5.53902	9.04055	164.005	85.388	0.941322	3540.55
WALL.297	-0.981943	7.74526	157.345	76.9469	1.41846	3255.26
WALL.301	0.991282	8.41863	178.188	67.1343	2.01047	3225.64
WALL.303	6.98249	8.0133	162.667	75.8741	1.07786	3316.57
WALL.309	7.50038	6.93276	153.564	79.5058	0.292103	3414.26
WALL.316	3.97341	8.41883	192.968	73.8726	1.42732	3327.98
WALL.317	1.53182	8.04312	170.522	76.7669	1.30297	3374.88
WALL.318	2.5135	6.06927	153.265	80.4108	0.338779	3457.4
